# Supplementary material for: Hexokinase regulates Mondo-mediated longevity via the PPP and organellar dynamics
Source: eLife. 2025 Aug 11;12:RP89225. doi: 10.7554/eLife.89225 (PMC12339002; doi:10.7554/eLife.89225)
Supplement: Figure 1—figure supplement 1—source data 3. [file elife-89225-fig1-figsupp1-data3.xlsx]

## Sheet: Figure S1A
Figure 1 - figure supplement 1A. MML-1 nuclear localization under hexokinase knockdown in the wgIs198 background.
luci	hxk-1i	hxk-2i
1.611	1.531	1.397
1.39	1.242	1.672
1.131	1.507	1.666
1.044	1.034	1.176
1.175	1.423	1.177
0.962	0.759	1.397
1.467	0.996	1.084
1.588	1.043	0.964
1.131	1.203	1.269
1.829	1.133	1.394
1.565	1.993	1.266
1.899	1.784	1.337
1.575	0.983	1.449
1.189	1.023	1.419
1.601	0.988	1.246
1.581	1.096	1.058
1.714	0.765	0.956
1.542	1.099	0.763
1.477	0.968	1.155
1.561	1.133	1.305
2.195	0.84	1.944
1.552	0.899	1.093
1.856	0.875	0.94
1.866	1.067	1.557
1.329	1.555	1.563
1.582	1.498	1.413
1.49	1.432	1.22
1.593	1.135	1.195
1.595	1.192	1.079
1.947	1.425	1.064
1.421	0.925	0.933
1.843	1.123	0.846
1.6	1.129	1.779
1.367	1.208	1.551
1.874	0.992	2.015
1.397	1.512	1.596
1.414	1.225	0.855
1.311	1.058	1.221
1.67	1.288	0.99
1.084	0.846	1.108
1.56	0.893	1.392
	0.962	1.381
	0.843	1.398
	0.925	1.361
	1.191	1.151
	1.687	1.344
	2.004	1.233
	1.173	0.694
	1.448	0.678
	1.435	0.97
	1.321	1.442
		1.281
		1.322
		1.223
		1.014
		1.1
		1.183
		1.472
		1.304
		0.924
		1.152
		0.745

## Sheet: Figure S1B
Figure 1 - figure supplement 1B. MML-1 nuclear localization under 3-BrP supplementation.
N2; 0 mM	N2; 5 mM	N2; 10 mM	N2; 20 mM	glp-1; 0 mM	glp-1; 5 mM	glp-1; 10 mM	glp-1; 20 mM
5.334	1.218	1.764	3.43	1.824	2.351	3.536	1.953
1.183	4.356	1.162	4.292	1.6	5.288	0.748	1.821
2.307	2.32	3.129	2.702	2.984	3.044	0.688	3.48
1.447	2.3	1.076	3.189	3.236	2.395	1.581	5.842
5.047	2.467	1.086	2.807	3.802	2.186	0.902	3.538
4.289	0.984	2.658	1.966	3.407	1.466	3.897	6.835
4.372	0.691	1.289	2.384	2.654	4.824	2.499	2.101
2.921	0.587	2.372	2.489	2.668	2.176	1.834	1.897
2.24	0.654	1.313	1.044	2.585	1.227	1.612	4.583
2.431	5.706	1.582	0.868	5.249	4.623	1.426	2.654
4.076	2.819	1.706	2.669	4.035	6.399	6.203	1.689
1.641	2.109	6.826	1.558	4.96	6.459	3.987	3.131
2.142	2.063	1.561	1.244	4.505	3.344	1.72	2.557
2.616	2.166	1.949	1.549	3.297	4.345	1.736	2.317
2.349	2.242	0.971	0.905	4.62	3.409	3.626	5.055
3.13	1.744	5.138	0.986	3.531	5.389	2.535	2.087
1.457	2.29	6.057	1.876	4.456	4.044	2.56	1.817
2.81	0.966	1.809	0.914	2.167	3.972	4.487	2.046
5.832	3.693	1.686	0.996	1.631	4.485	3.504	1.923
3.837	4.614	1.261	1.017	1.237	1.126	5.105	1.896
4.149	0.744	1.756	1.485	1.692	1.261	5.287	2.214
2.411	0.592	0.681	1.776	2.591	1.254	4.118	1.887
4.634	0.591	5.415	2.121	4.401	4.585	1.602	1.781
1.987	1.036	2.882	0.956	2.938	3.714	1.949	1.884
1.972	2.235	3.226	1.375	3.628	3.947		2.816
1.799	3.263	0.829	1.522	3.212	5.522		1.546
3.747	1.983	0.674	2.154	5.59	1.968		1.288
7.648	0.74	0.483	4.178	7.173	1.93		1.353
5.258	1.796	2.438	3.951	1.529	3.477		1.981
5.563	1.958	1.063	5.759	2.374	3.545		1.763
7.756	2.226	3.217	5.751	1.349	2.3		2.816
4.968	2.064	3.269	1.373	5.896	3.329		2.339
2.457	7.862	3.812	1.195	4.952	5.678		4.645
1.727	1.893	3.003	1.352	3.006	5.956		3.14
1.697	2.355	1.555	0.888	5.011	2.898		2.291
3.932	2.419	1.372	0.712	4.415	4.191		2.369
3.078	2.983	1.226	1.606	2.273	3.082		3.29
2.27	2.711	1.748	0.984	3.897	2.644		2.7
2.191	1.313	1.441	0.968	3.691	6.338		1.831
1.885	0.969	7.323	1.081	5.845	4.224		1.458
1.792	1.079	3.564	1.123	3.249	2.51		2.594
0.969	1.044	7.35	1.108	5.872	4.576		2.394
3.224	1.358	5.498	0.876	4.138	3.168		2.706
2.885	1.687	1.037	0.502	2.634			2.512
8.926	3.943	2.169	1.208	3.66			2.9
5.929	4.657	1.623	3.488	3.492			3.896
3.707	5.23	1.347	2.375	2.775			3.192
3.877	3.98	1.521	2.161	2.756			2.664
2.786	2.088	1.563	1.384	2.218			2.429
	1.382	2.004	1.36	1.622			1.899
	1.206	5.783	1.454	7.685			2.277
	1.072	3.756	1.24	4.704			2.045
	0.931	4.329	1.386	4.908			1.928
	2.393	0.948	1.019	3.689			3.504
	1.806	4.141	1.2	4.434			1.899
	1.465	5.442	2.381				2.155
	1.625	5.94	1.264				1.637
	0.64	1.556	1.112				1.775
	2.961	6.328	1.302				2.073
		4.587	0.965
		1.118	0.912
		0.969	0.88
		1.052	0.531
		1.147	0.533
		4.2	1.285
		1.477	1.038
		1.137
		1.339
		1.86
		2.712
		2.082
		1.656
		1.361

## Sheet: Figure S1C
Figure 1 - figure supplement 1C. MML-1 nuclear localization under 2-DG supplementation.
glp-1; 0 mM	glp-1; 50 mM
3.315	0.948
2.174	0.683
4.18	1.15
3.043	1.085
5.415	0.938
5.082	2.329
4.313	2.007
3.585	1.596
3.941	2.257
1.995	1.698
1.497	6.013
1.206	4.602
2.93	4.441
2.533	3.755
2.805	1.012
3.297	1.268
1.932	1.29
1.387	1.837
2.977	1.24
5.247	1.219
2.285	0.577
1.57	0.819
1.88	1.069
1.216	1.538
2.967	1.019
2.009	1.009
8.469	0.956
3.834	1.052
3.047	9.836
2.247	4.471
3.175	6.06
4.289	1.604
1.805	1.674
1.751	3.325
3.059	1.724
2.851	1.433
3.293	1.856
5.524	1.563
3.536	1.527
2.116	4.988
1.31	2.271
4.879	3.142
1.456
3.137
5.558
5.759
2.862
2.291
6.969
11.098
4.229
1.174
1.552
2.045
4.631
4.611
2.438
4.42
5.19
5.12
8.132
3.847
2.043
2.367

## Sheet: Figure S1E
Figure 1 - figure supplement 1E. Densitometry analysis of HXK-1::mKate2.
luci	hxk-1i	hxk-2i	hxk-3i	mml-1i
0.853456	0.177811	0.92106	0.752596	1.0038
1.176	0.062	0.595	1.02786	0.58
Figure 1 - figure supplement 1E. Densitometry analysis of HXK-2::mKate2.
luci	hxk-1i	hxk-2i	hxk-3i	mml-1i
1.61863	0.730509	0.178909	0.671725	0.858422
0.734	1.239	0.084	1.25486	0.655
1.25475	0.857453	0.25478	0.98745	1.26589
Figure 1 - figure supplement 1E. Densitometry analysis of HXK-3::mKate2.
luci	hxk-1i	hxk-2i	hxk-3i	mml-1i
1.44026	1.58349	0.713184	0.0965826	0.586765
0.821	0.778	1.522	0.083548	1.442
0.985471	0.87524	1.25478	0.12447	0.87541

## Sheet: Figure S1F
Figure 1 - figure supplement 1F. Body size area under hexokinase knockdown.
luci	hxk-1i	hxk-2i	hxk-3i
325.6	357.6	363.7	319.2
326.4	342.9	319	293.4
331.2	341	313.8	295.5
328.9	289	338.9	307
328.6	314.3	344.3	264.6
317.4	320.1	345.7	298.9
314	332.6	346.6	265.6
323.4	322.5	336.8	299.3
366.2	332.3	352.3	278.1
337.4	281.2	358.5	286.4
341.9	313	327	295.9
334.6	326.8	316.6	310.4
313.4	322.9	332.2	335.1
307.1	286.5	331.2	303.1
288.3	321.3	321	287.6
302.2	320.1	329.6	329.9
320.8	310.3	350.9	289.4
320.6	318.7	336.5	270.9
321.5	286.1	319	303.4
369.5	310	320.6	316.5
283.9	323.9	320.1	305.9
323.7	306.3	348.3	330
311.1	313.4	328.4	283.6
354.4	328.5	282.2	347.4
323.1	316.3	311.5	316.4
329.6	332.1	318.4	311.5
352.8	295.2	348.2	334.8
401.7	287.3	279.9	300.7
345.1	329.9	301.1	325.3
351.4	332.7	307.6	272.5
	337.8	339.9	336.8

## Sheet: Figure S1G
Figure 1 - figure supplement 1G. Body length under hexokinase knockdown.
luci	hxk-1i	hxk-2i	hxk-3i
2.68	2.83	2.8	2.68
2.78	2.82	2.56	2.46
2.76	2.67	2.53	2.55
2.66	2.75	2.69	2.63
2.78	2.68	2.62	2.36
2.7	2.62	2.73	2.52
2.6	2.55	2.71	2.35
2.67	2.63	2.64	2.5
2.83	2.73	2.7	2.42
2.62	2.56	2.7	2.43
2.82	2.65	2.61	2.46
2.67	2.66	2.65	2.58
2.61	2.64	2.71	2.57
2.62	2.61	2.72	2.61
2.55	2.69	2.7	2.5
2.66	2.73	2.66	2.69
2.6	2.68	2.79	2.44
2.74	2.61	2.63	2.42
2.66	2.57	2.57	2.44
2.81	2.69	2.64	2.56
2.55	2.64	2.61	2.48
2.64	2.69	2.8	2.72
2.71	2.69	2.66	2.48
2.72	2.6	2.39	2.67
2.69	2.57	2.52	2.61
2.6	2.79	2.66	2.62
2.69	2.66	2.74	2.56
3.18	2.67	2.58	2.5
2.65	2.67	2.51	2.61
2.68	2.69	2.52	2.43
	2.79	2.62	2.56

## Sheet: Figure S1H
Figure 1 - figure supplement 1H. Pharyngeal pumping rate under hexokinase knockdown.
N2	hxk-1i	hxk-2i	hxk-3i
96	117	54	63
102	66	90	93
117	84	87	69
51	105	90	63
87	69	72	93
99	81	102	138
105	72	48	69
69	111	51	102
123	66	66	102
75	75	30	75
60	108	51	60
93	96	93	48
99	72	69	63
99	60	105	36
129	93	63	93
108	27	48	51
87	114	51	75
87	117	96	90
63	108	87	75
60	60	45	84
93	123	66	114
63	90	84	102
66	81	111	87
96	108	81	93
99	117	66	126
81	120	105	111
84	93	111	105
51	87	102	69
84	81	90	105
69	102	111	96
81	78	90	84
105	111	108	87
60	87	105	75
111	96	96	78
63	78	69	42
72	87	102	87
96	108	72	75
99	105	84	93
93	108	81	81
90	96	90	117
87	69	84	96
96	78	63	57
78	63	90	90
90	84	93	96
81	105	75	66
93	90	93	114
81	84	96	93
93	81	90	81
57	81	87	87
87	72	90	114
75	48	72	84
81	81	69	99
108	54	75	105
135	54	120	72
87	30	72	66
81	90	108	90
54	75	63	96
75	69	51	84
81	90	87	87
54		93	75

## Sheet: Figure S1I
Figure 1 - figure supplement 1I. Thrashing assay under hexokinase knockdown.
luci	hxk-1i	hxk-2i	mml-1i
17	8	6	11
8	8	4	9
8	1	10	7
16	14	0	27
0	4	1	5
2	5	5	20
1	4	24	4
21	6	5	6
6	12	9	15
2	5	12	6

## Sheet: Figure S1J
Figure 1 - figure supplement 1J. mml-1 expression under hexokinase knockdown.
N2; luci	N2; hxk-1i	N2; hxk-2i	N2; hxk-3i	N2; mml-1i
1	1.158	1.241	1.001	0.368
1	1.3	1.369	0.897	0.258
1	0.87	0.789	1.287	0.268

## Sheet: Figure S1K
Figure 1 - figure supplement 1K. lgg-2 expression normalized to cdc-42
N2; luci	N2; hxk-1i	N2; hxk-2i	N2; hxk-3i	N2; mml-1i	glp-1; luci	glp-1; hxk-1i	glp-1; hxk-2i	glp-1; hxk-3i	glp-1; mml-1i
1	1.478	0.855	0.753	0.821	2.105	0.189	1.155	2.076	1.224
1	1.146	0.803	0.896	1.103	2.221	1.036	0.667	1.273	1.354
1	1.044	1.095	1.516	1.102	2.272	1.105	1.137	2.132	0.817
Figure 1 - figure supplement 1K. swt-1 expression normalized to cdc-42
N2; luci	N2; hxk-1i	N2; hxk-2i	N2; hxk-3i	N2; mml-1i	glp-1; luci	glp-1; hxk-1i	glp-1; hxk-2i	glp-1; hxk-3i	glp-1; mml-1i
1	1	1.017	1.089	1.005	3.275	2.143	2.415	3.079	1.578
1	2.19	0.965	1.405	1.203	4.843	1.779	2.073	3.661	1.306
1	0.725	1.49	1.14	1.08	4.739	2.212	2.965	4.187	1.187
Figure 1 - figure supplement 1K. fat-5 expression normalized to cdc-42
N2; luci	N2; hxk-1i	N2; hxk-2i	N2; hxk-3i	N2; mml-1i	glp-1; luci	glp-1; hxk-1i	glp-1; hxk-2i	glp-1; hxk-3i	glp-1; mml-1i
1	1.024	0.188	1.394	0.192	9.448	4.304	5.779	5.188	5.819
1	1.768	0.117	2.381	0.157	10.217	6.011	3.925	10.713	4.982
1	1.153	0.199	1.628	0.142	8.822	5.389	4.606	8.513	5.68

[truncated: 5 more sheets: Figure S1L, Figure S1M, Figure S1N, Figure S1O, Figure S1P]
