# Supplementary material for: Hexokinase regulates Mondo-mediated longevity via the PPP and organellar dynamics
Source: eLife. 2025 Aug 11;12:RP89225. doi: 10.7554/eLife.89225 (PMC12339002; doi:10.7554/eLife.89225)
Supplement: Figure 1—source data 1. [file elife-89225-fig1-data1.xlsx]

## Sheet: Figure 1B
Figure 1B. Screening for MML-1 nuclear localization regulators.
	Mean	SD
fgt-1	0.406	0.135
hxk-1	0.368	0.062
hxk-2	0.207	0.057
hxk-3	0.713	0.21
gpi-1	0.459	0.073
pfk-1.1	0.498	0.182
dlat-1	0.837	0.283
aldo-1	0.465	0.105
aldo-2	0.487	0.114
gpd-2	0.811	0.162
gpd-4	0.571	0.137
pgk-1	0.487	0.082
tpi-1	0.481	0.073
ipgm-1	0.471	0.083
enol-1	0.541	0.129
pyk-1	0.568	0.176
pyk-2	0.64	0.495
ldh-1	0.39	0.105
pdhk-2	0.836	0.248
aco-1	0.627	0.208
aco-2	0.76	0.206
idh-1	0.49	0.156
idh-2	0.828	0.217
ogdh-1	1.19	0.398
dld-1	1.587	0.531
rml-1	0.7	0.22
sucl-1	0.632	0.154
sucl-2	0.695	0.19
suca-1	1.057	0.528
sucg-1	1.791	0.603
sdha-1	1.145	0.352
sdha-2	0.485	0.086
sdhb-1	0.621	0.161
sdhd-1	0.468	0.075
gyg-1	0.653	0.151
fum-1	0.514	0.117
mdh-1	0.474	0.071
mdh-2	0.61	0.199
cts-1	0.794	0.218
acly-1	0.464	0.109
agl-1	0.785	0.295
Y57G11C.3	0.454	0.087
F26D11.1	0.468	0.171
T25B9.9	1.693	0.658
rpia-1	0.469	0.108
R151.2	0.845	0.221
F07A11.5	0.851	0.206
tkt-1	2.032	0.743
gfat-1	0.798	0.254
gfat-2	0.52	0.095
gna-1	0.566	0.221
gna-2	0.521	0.147
gale-1	0.636	0.196
pck-1	0.549	0.109
gsk-3	0.502	0.089
T04A8.7	0.82	0.24
gsy-1	0.502	0.073
gpd-3	1.227	0.528
tps-1	0.61	0.23
gob-1	0.569	0.164
cco-1	0.845	0.304

## Sheet: Figure 1D
Figure 1D. MML-1 nuclear localization under hexokinase knockdown in wildtype and glp-1.
N2; luci	N2; hxk-1i	N2; hxk-2i	glp-1; luci	glp-1; hxk-1i	glp-1; hxk-2i
1.89	1.46	1.33	4.22	1.33742	0.89
1.68	1.38	0.82	3.59	0.748716	1.45
1.93	0.95	1.05	4.15	1.24834	0.84
2.65	1.18	0.77	4.59	0.444371	0.2
2.03	1.23	0.9	3.67	1.34863	0.89
1.48	0.73	1.09	4.03	0.502405	1.3
2.43	1.13	0.38	2.74	1.11118	0.83
2.17	1.21	1.23	3.96	1.20973	1.1
2.18	0.88	0.88	3.89	1.12486	0.87
2.15	1.22	0.83	5.06	0.97297	1.01
2.17	1	0.53	3.81	1.47503	1.08
1.87	1.24	0.97	4.61	1.52106	0.77
2.27	0.89	1.21	4.14	0.71528	0.55
1.46	0.97	1.3	4.86	1.22004	0.28
2.63	0.84	0.43	4.07	0.869048	0.63
1.8	1.13	0.87	3.22	1.00804	1.11
2.08	0.66	0.85	3.5	1.53586	1.62
2.67	1.14	1.08	3.43	0.710303	0.94
1.51	0.92	1.32	4.98	1.4571	0.3
2.04	0.92	0.73	3.35	1.04041	1.13
2.3	0.84	1.12	2.8	1.27696	0.44
2.31	1.19	0.61	3.47	1.70798	0.83
1.85	1.36	0.7	2.38	1.29187	1.05
1.53	1.02	1.39	4.25	0.992753	1.09
2.31	0.84	0.85	5.02	1.54849	0.97
1.57	1.44	0.37	4.71	1.03563	0.76
2.02	0.75	0.92	5.2	1.71112	0.59
2.13	1.09	1.02	3.55	1.63371	1.27
2.12	1.04	0.54	4.35	1.3934	0.65
2.11	1.28	1.62	2.96	1.34616	0.33
2.16	1.09	0.98	3.59	1.15866	0.94
2.13	1.34	0.81	3.79	0.652484	0.67
2.32	1.46	0.61	3.19	1.67708	0.93
1.34	1.26	0.67	4.17	1.27556	1.33
2.3	0.9	1.2	3.79	0.995708	0.92
2.66	1.33	0.82	3.66	1.08779	0.95
1.8	1.07	1.45	4.09	0.924376	0.64
1.93	1.08	0.56	4.05	1.25954	1.21
1.02	1.11	0.9	4	0.984829	0.88
1.1	1.36	0.44	3.11	0.33835	1.51
2.7	1.67	0.84	3.94	1.19422	0.77
2.27	1.25	1.33	3.01	0.652567	1.41
2.33	0.98	0.87	4.18	1.17556	0.42
2.45	1.13	1.2	2.3	0.952456	0.56
1.9	1.17	1.22	5.81	1.45118	1.02

## Sheet: Figure 1E
Figure 1E. mdl-1 expression normalized to cdc-42
N2; luci	N2; hxk-1i	N2; hxk-2i	N2; hxk-3i	N2; mml-1i	glp-1; luci	glp-1; hxk-1i	glp-1; hxk-2i	glp-1; hxk-3i	glp-1; mml-1i
1	1.032	1.091	1.864	1.169	5.161	2.233	2.653	4.724	1.909
1	0.377	0.765	1.8	0.23	4.89	2.584	1.794	3.694	1.653
1	0.416	1.352	1.993	0.406	10.953	1.597	2.688	5.776	1.576

## Sheet: Figure 1F
Figure 1F. Lifespan of glp-1 under hexokokinase knockdown.
Day	N2; luci	N2; hxk-1i	N2; hxk-2i	N2; mml-1i	glp-1; luci	glp-1; hxk-1i	glp-1; hxk-2i	glp-1; mml-1i
2	0
3	0
3	0
3	0
3	0
3	0
5	0
5	0
5	0
5	0
5	0
5	0
5	0
5	0
7	0
7	0
7	0
7	0
7	0
7	0
7	0
7	0
7	0
7	0
7	0
7	0
9	1
9	1
9	1
9	1
9	1
9	1
9	1
9	1
9	0
9	0
9	0
9	0
9	0
9	0
9	0
9	0
9	0
12	1
12	1
12	1
12	1
12	1
12	1
12	1
12	1
12	1
12	1
12	1
12	1
12	1
12	1
12	1
12	1
12	1
12	1
12	0
12	0
12	0
12	0
12	0
12	0
12	0
12	0
12	0
12	0
12	0
12	0
12	0
12	0
12	0
12	0
12	0
12	0
14	1
14	1
14	1
14	1
14	1
14	1
14	1
14	1
14	1
14	1
16	1
16	1
16	1
16	1
16	1
16	1
16	1
16	1
16	1
20	1
20	1
20	1
20	1
20	1
20	1
20	1
20	1
20	1
20	1
20	1
20	1
20	1
20	1
20	1
20	1
20	1
20	1
20	1
20	1
22	1
3		0
3		0
5		0
5		0
5		0
5		0
5		0
5		0
5		0
5		0
7		1
7		0
7		0
7		0
7		0
7		0
7		0
7		0
7		0
7		0
7		0
9		0
9		0
9		0
9		0
9		0
9		0
9		0
9		0
12		1
12		1
12		1
12		1
12		1
12		1
12		1
12		1
12		1
12		1
12		0
12		0
12		0
12		0
12		0
12		0
14		1
14		1
14		1
14		1
14		1
14		1
14		1
14		1
14		1
14		0
14		0
14		0
16		1
16		1
16		1
16		1
16		1
16		1
16		1
16		1
16		1
16		1
16		1
16		1
16		1
16		1
16		1
16		1
16		1
16		1
16		1
16		0
16		0
16		0
16		0
20		1
20		1
20		1
20		1
20		1
20		1
20		1
20		1
20		1
20		1
20		1
20		1
20		1
20		1
20		1
20		1
20		1
20		1
20		0
20		0
22		1
22		1
22		1
22		1
22		1
23		1
27		1
27		1
27		1
27		1
27		1
27		1
27		1
27		1
27		1
2			0
3			0
3			0
3			0
3			0
3			0
3			0
3			0
5			1
5			0
5			0
5			0
5			0
5			0
5			0
5			0
5			0
5			0
5			0
5			0
5			0
5			0
5			0
5			0
5			0
5			0
7			1
7			0
7			0
7			0
7			0
7			0
7			0
7			0
7			0
7			0
7			0
7			0
7			0
7			0
7			0
7			0
7			0
7			0
7			0
7			0
7			0
7			0
7			0
7			0
7			0
7			0
7			0
9			1
9			1
9			1
9			1
9			1
9			1
9			0
9			0
9			0
9			0
9			0
9			0
9			0
9			0
9			0
9			0
9			0
12			1
12			1
12			1
12			1
12			1
12			1
12			1
12			1
12			1
12			1
12			1
12			1
12			1
12			1
12			1
12			1
12			1
12			0
14			1
14			1
14			1
14			1
14			1
14			1
14			1
14			1
14			1
14			1
14			1
16			1
16			1
16			1
16			1
16			1
16			1
16			1
16			1
16			0
16			0
16			0
20			1
20			1
20			1
20			1
20			1
20			1
22			1
22			1
22			1
3				0
3				0
3				0
3				0
3				0
3				0
3				0
3				0
3				0
3				0
3				0
3				0
3				0
3				0
3				0
3				0
3				0
3				0
3				0
3				0
5				0
5				0
5				0
5				0
7				1
7				0
7				0
7				0
7				0
7				0
7				0
7				0
7				0
7				0
7				0
7				0
9				1
9				1
9				1
9				1
9				1
9				1
9				0
9				0
9				0
9				0
9				0
12				1
12				1
12				1
12				1
12				1
12				1
12				1
12				1
12				1
12				1
12				1
12				1
12				1
12				1
12				1
12				1
12				1
12				1
12				1
12				1
12				0
14				1
14				1
14				1
14				1
14				1
14				1
14				1
14				1
14				1
14				1
14				0
16				1
16				1
16				1
16				1
16				1
16				1
16				1
16				1
16				1
16				1
20				1
20				1
20				1
20				1
20				1
20				1
20				1
20				1
20				1
20				1
20				1
20				1
20				1
20				1
20				0
22				1
22				1
22				1
22				1
22				1
27				1
27				1
27				1
27				1
27				1
2					0
7					0
7					0
7					0
7					0
7					0
7					0
7					0
9					1
9					0
12					1
12					1
12					1
12					1
12					1
12					1
12					0
12					0
12					0
12					0
12					0
14					1
14					1
14					1
14					1
14					0
14					0
14					0
14					0
16					1
16					1
16					1
16					1
16					1
16					1
16					1
16					1
16					1
16					1
16					1
16					1
16					0
16					0
16					0
16					0
16					0
16					0
20					1
20					1
20					1
20					1
20					0
20					0
20					0
20					0
20					0
22					1
22					1
22					1
22					1
22					1
22					0
22					0
22					0
22					0
22					0
22					0
22					0
27					1
27					1
27					1
27					1
27					1
27					0
27					0
27					0
27					0
29					1
29					0
30					1
30					1
30					1
30					1
30					1
30					1
30					1
30					0
30					0
33					1
33					1
33					1
33					1
33					1
33					1
33					1
40					1
40					1
40					1
40					1
40					1
40					1
40					1
40					1
40					1
40					1
40					1
40					1
40					1
40					1
40					1
40					1
40					1
40					1
40					1
40					1
40					1
40					1
2						0
5						0
5						0
5						0
5						0
5						0
5						0
5						0
7						1
7						1
7						0
7						0
7						0
7						0
7						0
7						0
7						0
7						0
7						0
7						0
7						0
7						0
9						0
9						0
9						0
9						0
9						0
9						0
12						1
12						1
12						1
12						1
12						0
12						0
14						0
14						0
14						0
14						0
14						0
14						0
14						0
14						0
14						0
15						1
15						0
16						1
16						1
16						1
16						1
16						1
20						1
20						1
20						1
20						1
20						1
20						1
20						1
20						1
20						1
20						1
20						1
20						1
20						0
20						0
22						1
22						1
22						1
22						1
22						1
22						1
22						1
22						1
22						1
22						1
22						1
22						1
22						1
22						1
22						1
22						1
22						1
22						1
22						0
27						1
27						1
27						1
27						1
27						1
27						1
27						1
27						1
27						1
27						1
27						1
27						1
27						1
27						1
27						1
27						1
29						1
29						1
29						1
29						1
29						1
29						1
29						1
33						1
33						1
33						1
33						1
33						1
40						1
40						1
40						1
40						1
40						1
40						1
5							1
5							0
5							0
5							0
5							0
5							0
7							1
7							0
7							0
7							0
7							0
7							0
9							1
9							0
9							0
9							0
9							0
9							0
9							0
9							0
9							0
10							1
12							1
12							1
12							1
12							1
12							1
12							1
12							1
12							1
12							1
12							1
12							1
14							1
14							1
14							1
16							1
16							1
20							1
20							1
20							1
20							1
20							1
20							1
20							1
20							1
22							1
27							1
29							1
29							1
29							1
5								0
5								0
5								0
5								0
5								0
7								0
9								0
9								0
12								1
12								1
12								1
12								1
12								1
12								1
12								1
12								1
12								1
12								1
14								1
14								1
14								1
16								1
16								1
16								1
20								1
20								1
20								1
20								1
20								1
20								1
20								1
22								1
22								1
22								1
22								1
22								1
22								1
22								1
22								1
22								1
27								1
27								1
27								1
27								1
27								1
27								1
27								1
27								1

## Sheet: Figure 1G
Figure 1G. MML-1 nuclear localization under hexokinase knockdown in wildtype and isp-1.
N2; luci	N2; hxk-1i	N2; hxk-2i	isp-1; luci	isp-1; hxk-1i	isp-1; hxk-2i
1.53	0.7	1.38	4.17	1.07	0.8
2.17	1.03	1.21	4.1	1.07	1.39
2.28	0.63	0.86	3.86	1.31	1.16
1.77	1.1	1.32	4.22	1.13	0.8
2.41	0.95	0.96	3.85	0.35	1.47
2.61	1.13	1.56	3.87	0.98	1.06
1.84	1	1.12	2.03	1.13	0.84
2.3	0.6	1.04	3.16	1.45	0.63
1.7	0.9	1.41	4.07	1.06	1.86
2.35	1.12	1.19	3.42	0.96	1.67
2.16	1.1	0.91	3.52	1.54	1.12
2.62	1.23	1.51	3.79	1.46	1.72
1.86	1.16	0.73	3.46	0.89	1.24
2.58	0.78	0.81	3.11	1.27	0.78
2.01	0.89	0.93	2.88	0.76	1.29
2.19	1.29	1.16	2.25	1.44	1.02
2.36	1.08	1.07	3.4	0.75	1.44
2.8	1.05	1.2	3.78	1.04	1.01
2.02	1.33	1.31	3.17	1.41	1.53
2.52	1.11	0.99	3.81	0.96	1.44
1.52	0.85	1.76	3.94	1.34	1.04
1.76	1.34	0.38	3.72	1.4	1.35
2.19	1.55	0.69	2.22	1.06	0.5
2.38	1	1.33	3.38	1.3	0.91
2.39	1.26	1.14	3.65	1.39	1.31
1.7	0.8	1.17	3.56	1.09	0.85
2.05	0.66	1.24	3.86	1.28	0.31
2.3	0.95	0.93	3.4	0.95	1.02
1.67	0.65	0.89	3.84	1.31	1.03
2.47	1.45	1.1	3.07	1.01	0.92
2.27	1.14	0.96	3.87	1.25	0.55
2.36	0.79	1.22	3.48	1.14	1.28
2.42	1.48	0.66	3.38	1.02	1.5
1.82	0.91	0.62	4.94	1.66	1.28
2.48	1.01	1.42	3.13	1.28	1.35
2.42	0.97	0.38	4.78	1.59	1.53
2.85	1.01	0.57	3.78	1.19	1.2
0.97	1.11	1.2	3.61	1.02	1.42
2.54	0.75	1.1	3.78	1.12	1.12
1.14	1.08	1.04	2.71	1.25	0.64
1.63	0.71	1.35	4.54	1.76	1.08
2.01	0.88	0.91	4.73	1.16	1.08
2	0.98	1.28	3.43	1.52	1.88
1.99	0.62	0.78	2.97	1.13	0.91
1.69	1	1.68	2.86	1.47	1.34

## Sheet: Figure 1H
Figure 1F. Lifespan of isp-1 under hexokokinase knockdown.
Day	isp-1; luci	isp-1; hxk-1i	isp-1; hxk-2i	isp-1; mml-1i	N2; luci	N2; hxk-1i	N2; hxk-2i	N2; mml-1i
2	0
2	0
2	0
2	0
3	0
3	0
3	0
3	0
3	0
3	0
3	0
3	0
3	0
3	0
3	0
3	0
3	0
3	0
3	0
3	0
3	0
3	0
3	0
3	0
3	0
3	0
3	0
3	0
3	0
6	0
6	0
6	0
6	0
6	0
6	0
6	0
6	0
6	0
6	0
6	0
6	0
6	0
6	0
6	0
6	0
6	0
6	0
6	0
6	0
6	0
6	0
6	0
6	0
6	0
6	0
6	0
6	0
6	0
6	0
6	0
6	0
6	0
6	0
6	0
6	0
6	0
6	0
6	0
6	0
6	0
6	0
6	0
6	0
6	0
6	0
6	0
6	0
6	0
6	0
6	0
6	0
6	0
6	0
6	0
6	0
6	0
6	0
6	0
6	0
6	0
6	0
6	0
6	0
6	0
6	0
6	0
6	0
6	0
6	0
6	0
6	0
6	0
6	0
6	0
6	0
6	0
6	0
6	0
6	0
6	0
6	0
6	0
6	0
6	0
6	0
6	0
6	0
6	0
6	0
6	0
6	0
6	0
6	0
6	0
6	0
6	0
6	0
8	0
8	0
8	0
8	0
8	0
8	0
8	0
8	0
8	0
8	0
8	0
8	0
8	0
8	0
8	0
8	0
10	0
10	0
10	0
10	0
10	0
10	0
10	0
10	0
10	0
10	0
14	1
14	0
14	0
14	0
14	0
21	1
21	1
21	1
21	1
21	1
21	1
21	1
28	1
28	1
28	1
28	1
30	1
30	1
30	1
30	1
30	1
33	1
33	1
33	1
33	1
33	1
33	1
3		0
3		0
3		0
3		0
3		0
3		0
3		0
3		0
3		0
3		0
3		0
3		0
3		0
3		0
3		0
3		0
3		0
3		0
3		0
3		0
3		0
3		0
3		0
3		0
3		0
3		0
3		0
3		0
6		0
6		0
6		0
6		0
6		0
6		0
6		0
6		0
6		0
6		0
6		0
6		0
6		0
6		0
6		0
6		0
6		0
6		0
6		0
6		0
6		0
6		0
6		0
6		0
6		0
6		0
6		0
6		0
6		0
6		0
6		0
6		0
6		0
6		0
6		0
6		0
6		0
6		0
6		0
6		0
6		0
6		0
6		0
6		0
6		0
6		0
6		0
6		0
6		0
6		0
6		0
6		0
6		0
6		0
6		0
6		0
6		0
6		0
6		0
6		0
6		0
6		0
6		0
6		0
6		0
6		0
6		0
6		0
6		0
6		0
6		0
6		0
6		0
6		0
6		0
6		0
6		0
6		0
6		0
6		0
6		0
6		0
6		0
6		0
6		0
6		0
6		0
6		0
6		0
6		0
6		0
6		0
6		0
6		0
6		0
6		0
6		0
6		0
6		0
8		0
8		0
8		0
8		0
8		0
8		0
8		0
8		0
8		0
8		1
8		0
8		1
8		0
8		0
8		1
8		1
8		0
8		1
8		1
10		1
10		1
10		1
10		0
10		0
10		1
10		1
10		1
10		0
14		1
14		1
18		1
18		1
21		1
21		1
21		1
21		1
21		1
21		1
21		1
21		1
21		1
21		1
21		1
21		1
21		1
21		1
21		1
21		1
21		1
21		1
21		1
21		1
21		1
3			0
3			0
3			0
3			0
3			0
3			0
3			0
3			0
3			0
3			0
3			0
3			0
3			0
3			0
3			0
3			0
3			0
3			0
3			0
3			0
3			0
3			0
3			0
3			0
3			0
3			0
3			0
3			0
3			0
6			0
6			0
6			0
6			0
6			0
6			0
6			0
6			0
6			0
6			0
6			0
6			0
6			0
6			0
6			0
6			0
6			0
6			0
6			0
6			0
6			0
6			0
6			0
6			0
6			0
6			0
6			0
6			0
6			0
6			0
6			0
6			0
6			0
6			0
6			0
6			0
6			0
6			0
6			0
6			0
6			0
6			0
6			0
6			0
6			0
6			0
6			0
6			0
6			0
6			0
6			0
6			0
6			0
6			0
6			0
6			0
6			0
6			0
6			0
6			0
6			0
6			0
6			0
6			0
6			0
6			0
6			0
6			0
6			0
6			0
6			0
6			0
6			0
6			0
6			0
6			0
6			0
6			0
8			0
8			0
8			0
8			0
8			0
8			0
8			0
8			0
8			0
8			0
8			0
8			0
8			0
8			0
8			0
8			0
8			0
8			0
8			0
8			0
8			0
8			0
8			0
9			0
9			0
9			0
9			0
9			0
9			0
10			1
10			1
10			0
10			0
10			0
10			0
10			0
10			0
10			0
11			0
14			1
14			1
14			1
21			1
21			1
21			1
21			1
21			1
21			1
21			1
21			1
21			1
21			1
21			1
21			1
21			1
21			1
21			1
21			1
21			1
21			1
21			1
21			1
21			1
21			1
21			1
21			1
21			1
21			1
21			1
21			1
21			1
23			1
23			1
3				0
3				0
3				0
3				0
3				0
3				0
3				0
3				0
3				0
3				0
3				0
3				0
3				0
3				0
3				0
3				0
3				0
3				0
3				0
3				0
3				0
3				0
3				0
3				0
3				0
3				0
3				0
6				0
6				0
6				0
6				0
6				0
6				0
6				0
6				0
6				0
6				0
6				0
6				0
6				0
6				0
6				0
6				0
6				0
6				0
6				0
6				0
6				0
6				0
6				0
6				0
6				0
6				0
6				0
6				0
6				0
6				0
6				0
6				0
6				0
6				0
6				0
6				0
6				0
6				0
6				0
6				0
6				0
6				0
6				0
6				0
6				0
6				0
6				0
6				0
6				0
6				0
6				0
6				0
6				0
6				0
6				0
6				0
6				0
6				0
6				0
6				0
6				0
6				0
6				0
6				0
6				0
6				0
6				0
6				0
6				0
6				0
6				0
6				0
6				0
6				0
6				0
6				0
6				0
6				0
6				0
6				0
6				0
6				0
6				0
6				0
6				0
6				0
6				0
6				0
6				0
6				0
8				0
8				0
8				0
8				0
8				0
8				0
8				0
8				0
8				0
8				0
8				0
8				0
8				0
8				0
8				0
8				0
8				0
8				0
8				0
8				0
10				0
10				0
10				0
10				0
10				0
10				0
10				0
10				0
10				0
14				1
14				1
14				1
14				1
14				1
14				1
14				1
14				1
14				1
14				1
14				1
17				1
17				1
17				1
17				1
17				1
17				1
17				1
17				1
17				1
19				1
19				1
19				1
19				1
21				1
21				1
21				1
21				1
21				1
21				1
21				1
21				1
21				1
21				1
3					0
3					0
3					0
3					0
3					0
3					0
3					0
3					0
3					0
3					0
3					0
3					0
3					0
3					0
5					0
5					0
5					0
5					0
5					0
5					0
5					0
5					0
5					0
5					0
5					0
5					0
5					0
5					0
8					0
8					0
8					0
8					0
8					0
8					0
10					1
10					1
10					1
10					1
10					0
10					0
13					1
13					1
13					1
13					1
13					1
13					1
13					1
13					1
13					1
13					1
13					1
13					1
13					1
13					1
16					1
16					1
16					1
16					1
16					1
16					1
16					1
16					1
16					1
16					1
16					1
16					1
16					1
16					1
16					1
16					0
18					1
18					1
18					1
18					1
18					1
18					1
18					1
20					1
20					1
20					1
20					1
20					1
20					1
20					1
20					1
20					1
20					1
20					1
20					1
22					1
22					1
22					1
22					1
22					1
22					1
22					1
22					1
22					1
22					1
24					1
24					1
3						0
3						0
3						0
3						0
3						0
3						0
3						0
3						0
3						0
3						0
3						0
3						0
3						0
3						0
5						0
5						0
5						0
5						0
5						0
5						0
5						0
5						0
5						0
5						0
5						0
5						0
5						1
5						1
8						1
8						1
8						1
8						1
8						1
8						1
10						1
10						1
10						1
10						1
10						1
10						1
13						1
13						1
13						1
13						1
13						1
13						1
13						1
13						1
13						1
13						1
13						1
13						1
13						1
13						1
16						1
16						1
16						1
16						1
16						0
16						0
16						0
16						1
16						1
16						1
16						1
16						1
16						1
16						1
16						1
16						1
18						1
18						1
18						1
18						1
18						1
18						1
18						1
20						1
20						1
20						1
20						1
20						1
20						1
20						1
20						1
20						1
20						1
20						1
20						1
22						1
22						1
22						1
22						1
22						1
22						1
22						1
22						1
22						1
22						1
24						1
24						1
3							0
3							0
3							0
3							0
3							0
3							0
3							0
3							0
3							0
3							1
3							1
3							1
3							1
3							1
5							1
5							1
5							1
5							1
5							1
5							1
5							1
5							1
5							1
5							1
5							1
5							1
5							1
5							1
8							1
8							1
8							1
8							1
8							1
8							1
10							1
10							1
10							1
10							1
10							1
10							1
13							1
13							1
13							1
13							1
13							1
13							1
13							1
13							1
13							1
13							1
13							1
13							1
13							1
13							1
16							1
16							1
16							1
16							1
16							1
16							1
16							1
16							1
16							1
16							1
16							1
16							1
16							1
16							1
16							1
16							1
18							1
18							1
18							1
18							1
18							1
18							1
18							1
20							1
20							1
20							1
20							1
20							1
20							1
20							1
20							1
20							1
20							1
20							1
20							1
22							1
22							1
22							1
22							1
22							1
22							1
22							1
22							1
22							1
22							1
24							1
24							1
3								0
3								0
3								0
3								0
3								0
3								0
3								0
3								0
3								0
3								0
3								0
3								0
3								0
3								0
5								0
5								0
5								0
5								0
5								0
5								0
5								0
5								0
5								0
5								0
5								0
5								0
5								0
5								1
8								1
8								1
8								1
8								1
8								1
8								1
10								1
10								0
10								0
10								0
10								0
10								0
13								0
13								0
13								0
13								1
13								1
13								1
13								1
13								1
13								1
13								1
13								1
13								1
13								0
13								1
16								1
16								1
16								1
16								1
16								1
16								1
16								1
16								1
16								1
16								1
16								1
16								1
16								1
16								1
16								1
16								1
18								1
18								1
18								1
18								1
18								1
18								1
18								1
20								1
20								1
20								1
20								1
20								1
20								1
20								1
20								1
20								1
20								1
20								1
20								1
22								1
22								1
22								1
22								1
22								1
22								1
22								1
22								1
22								1
22								1
24								1
24								1
