# Supplementary material for: Hexokinase regulates Mondo-mediated longevity via the PPP and organellar dynamics
Source: eLife. 2025 Aug 11;12:RP89225. doi: 10.7554/eLife.89225 (PMC12339002; doi:10.7554/eLife.89225)
Supplement: Figure 2—figure supplement 1—source data 1. [file elife-89225-fig2-figsupp1-data1.xlsx]

## Sheet: Figure S2C
Figure 2-figure supplement 1C. Intensity plots of ROIs from Figure S2B.
luci					hxk-2i
Distance (microns)	MML-1::GFP	LMP-1::mKate2			Distance (microns)	MML-1::GFP	LMP-1::mKate2
0	0.6666	8.33335			0	0	13.6667
0.02332	0.349	7.7451			0.03544	0	13.2498
0.04664	0.0314	6.90195			0.07088	0	12.5574
0.06995	0	6.16275			0.10633	0	11.909
0.09327	0.0332	5.79215			0.14177	0	11.4387
0.11659	0	5.7941			0.17721	0	11.166
0.13991	0.196	6.051			0.21265	0.06935	11.2821
0.16322	0.6666	6.6157			0.24809	0.1734	11.5465
0.18654	0.6666	7.1956			0.28354	0.2951	12.0054
0.20986	0.6666	7.2061			0.31898	0.53005	12.5306
0.23318	0.6666	7.08995			0.35442	0.8893	12.7377
0.25649	0.6666	6.6902			0.38986	1.0492	12.7995
0.27981	0.6666	6.4196			0.42531	1.1025	12.959
0.30313	0.6666	6.21375			0.46075	0.8579	12.957
0.32645	0.5892	5.9843			0.49619	0.6143	12.7714
0.34977	0.6666	5.48845			0.53163	0.44535	12.6612
0.37308	0.6666	4.5677			0.56707	0.33335	12.4972
0.3964	0.7334	3.36665			0.60252	0.33335	12.1366
0.41972	1.051	2.349			0.63796	0.3344	11.9311
0.44304	0.8506	2.11375			0.6734	0.3566	11.4944
0.46635	0.7912	2.6828			0.70884	0.6612	11.0056
0.48967	0.6706	3.8706			0.74428	1.249	10.5144
0.51299	0.9882	5.251			0.77973	2.3897	9.90165
0.53631	1.3058	6.28245			0.81517	4.52295	9.41035
0.55962	1.2668	6.3608			0.85061	7.4533	9.21295
0.58294	1.2422	5.93135			0.88605	10.9602	9.33565
0.60626	0.7058	5.38015			0.92149	14.504	9.55995
0.62958	0.6666	4.7843			0.95694	17.4371	10.1804
0.6529	0.9768	4.7001			0.99238	20.1366	10.9836
0.67621	1.1088	4.827			1.02782	22.7487	11.9235
0.69953	1.3334	5.09805			1.06326	25.975	12.8634
0.72285	1.5686	5.1662			1.09871	29.0999	13.5628
0.74617	2.1568	5.26645			1.13415	31.5328	13.9572
0.76948	2.745	5.9931			1.16959	32.5354	13.898
0.7928	3.3334	7.06665			1.20503	32.4123	13.7869
0.81612	3.9216	8.31375			1.24047	31.7757	13.5355
0.83944	3.4662	9.5608			1.27592	31.2506	13.2842
0.86276	3.3334	10.105			1.31136	31.1607	12.7652
0.88607	2.9472	9.5548			1.3468	32.1298	12.0054
0.90939	2.6666	8.0142			1.38224	34.2499	11.2951
0.93271	2.8628	5.8039			1.41768	37.0281	10.7384
0.95603	3.4592	3.43335			1.45313	39.3494	10.5193
0.97934	4.7142	1.5961			1.48857	40.0938	10.7377
1.00266	5.926	0.73725			1.52401	38.5388	11.2043
1.02598	8.2472	0.97645			1.55945	35.297	11.3333
1.0493	10.4902	1.7803			1.59489	32.0605	11.4863
1.07261	13.0118	2.96515			1.63034	30.0218	11.2787
1.09593	15.6058	4.0157			1.66578	29.5779	11.1804
1.11925	17.8666	4.8427			1.70122	30.2302	11.1913
1.14257	19.9808	5.1257			1.73666	30.2337	11.2022
1.16589	21.504	4.86275			1.77211	29.1917	11.2131
1.1892	22.6666	4.33335			1.80755	26.8032	11.2705
1.21252	23.3864	3.5167			1.84299	24.2323	11.5028
1.23584	23.4226	2.5488			1.87843	22.6111	11.7431
1.25916	24.449	1.90195			1.91387	22.5258	11.9265
1.28247	26.7336	1.52655			1.94932	24.6765	11.9345
1.30579	30.407	1.69805			1.98476	27.9293	12.2439
1.32911	35.1764	2.30195			2.0202	30.7063	12.4535
1.35243	40.3958	3.26665			2.05564	31.473	12.9235
1.37574	43.807	4.4272			2.09108	30.1473	13.4854
1.39906	44.7128	5.28605			2.12653	27.8962	14.0312
1.42238	44.4468	5.843			2.16197	25.6667	14.6667
1.4457	43.5258	5.8745			2.19741	24.7642	14.7416
1.46902	43.7138	5.83575			2.23285	24.922	14.7586
1.49233	45.2392	5.0971			2.26829	25.7606	14.5938
1.51565	48.804	4.248			2.30374	27.3009	14.3428
1.53897	54.4622	3.43115			2.33918	28.6215	14.3914
1.56229	61.5388	2.6362			2.37462	29.5038	14.5595
1.5856	70.2666	2			2.41006	30.2404	15.2131
1.60892	77.9096	1.66955			2.44551	31.1056	15.6722
1.63224	84.4152	1.45445			2.48095	32.103	16.1644
1.65556	88.3912	1.57695			2.51639	33.2445	16.5902
1.67887	89.296	1.7421			2.55183	33.5164	16.8579
1.70219	87.8214	1.71765			2.58727	32.9044	17.0573
1.72551	84.208	1.62955			2.62272	31.7408	17.3169
1.74883	79.6898	1.33335			2.65816	30.0114	17.5465
1.77215	74.2652	1.188			2.6936	28.8153	17.647
1.79546	69.1476	0.6586			2.72904	27.9809	17.4783
1.81878	64.4346	0.50775			2.76448	27.6292	16.9235
1.8421	60.0042	0.3901			2.79993	27.665	16.3421
1.86542	57.398	0.5294			2.83537	27.6707	15.6669
1.88873	56.7156	0.9167			2.87081	27.5572	15.7049
1.91205	58.4304	1.624			2.90625	26.9535	16.0765
1.93537	63.1564	2.74685			2.94169	26.152	16.5673
1.95869	69.9668	4.1029			2.97714	25.7164	17.3159
1.98201	78	5.33335			3.01258	25.6692	17.1916
2.00532	85.445	6.26965			3.04802	25.7681	16.1452
2.02864	91.4114	6.9257			3.08346	24.828	14.5001
2.05196	95.4372	7.3015			3.11891	22.1684	12.4207
2.07528	97.9042	7.58145			3.15435	18.2723	10.4773
2.09859	99.6286	8.3887			3.18979	13.5542	9.1047
2.12191	100.215	9.70785			3.22523	9.4524	8.1421
2.14523	99.965	11.7096			3.26067	6.33605	7.42625
2.16855	97.9764	13.9544			3.29612	4.1093	6.91805
2.19186	93.2236	16.5721			3.33156	3.07105	6.1967
2.21518	86.2746	18.9764			3.367	2.36095	5.82515
2.2385	77.635	20.9414			3.40244	1.91385	5.69945
2.26182	68.7246	22.2921			3.43788	1.5722	5.92895
2.28514	61.0238	23.5324			3.47333	1.2268	6.2676
2.30845	55.7988	24.6734			3.50877	0.90435	6.7213
2.33177	53.7324	25.9446			3.54421	0.6726	6.9071
2.35509	54.8292	27.8264			3.57965	0.43445	6.74245
2.37841	58.6666	29.3333			3.61509	0.2951	6.28415
2.40172	62.9746	31.0725			3.65054	0.18035	5.81135
2.42504	65.1386	32.6784			3.68598	0.06555	5.1257
2.44836	65.4198	33.8495			3.72142	0	4.7799
2.47168	63.941	34.7834			3.75686	0	4.66665
2.49499	63.2274	35.6054			3.79231	0	4.9508
2.51831	64.561	35.992			3.82775	0	5.6612
2.54163	68.0234	36.1023			3.86319	0	6.8204
2.56495	70.932	35.7497			3.89863	0	8.12845
2.58827	72.0144	34.8439			3.93407	0.01095	9.10545
2.61158	68.1408	33.063			3.96952	0.13115	9.63655
2.6349	61.1608	30.4959			4.00496	0.16665	9.3656
2.65822	52.907	27.3172
2.68154	45.8536	24.0911
2.70485	41.5644	21.0666
2.72817	39.5516	18.702
2.75149	39.1764	17.0755
2.77481	38	16.6
2.79812	35.557	17.5744
2.82144	30.9966	19.774
2.84476	25.3648	22.997
2.86808	20.1058	26.6686
2.8914	15.7412	30.1965
2.91471	12.9216	32.5628
2.93803	11.1216	33.594
2.96135	10.322	32.8941
2.98467	10.6514	31.1059
3.00798	10.9764	28.5864
3.0313	12.2352	26.2999
3.05462	13.451	23.876
3.07794	14.5942	21.657
3.10125	15.0862	19.3867
3.12457	14.6118	17.1451
3.14789	13.4372	15.0392
3.17121	12.1334	12.9334
3.19453	11.39	10.9087
3.21784	11.3334	9.22745
3.24116	11.3334	7.70045
3.26448	11.2296	6.5167
3.2878	11.0088	5.9593
3.31111	9.8352	5.78825
3.33443	8.5332	5.74095
3.35775	7.553	5.64705
3.38107	6.7024	5.35465
3.40439	7.2156	5.0588
3.4277	7.8232	4.5294
3.45102	9.1294	3.9412
3.47434	10.3098	3.5098
3.49766	11.5294	3.4902
3.52097	12.596	3.72745
3.54429	12.8254	4.1804
3.56761	12.5334	4.63335
3.59093	11.153	5.10105
3.61424	9.7058	5.3218
3.63756	8.0392	5.2623
3.66088	6.559	5.03045
3.6842	5.5284	4.94465
3.70752	4.9764	5.0744
3.73083	4.7058	5.406
3.75415	4.4352	5.94315
3.77747	4.2902	6.6865
3.80079	4.3372	7.43725
3.8241	4.3178	8.1843
3.84742	3.8696	8.5392
3.87074	3.4352	8.88625
3.89406	2.8118	9.6157
3.91737	2.5412	10.5059
3.94069	2.349	11.253
3.96401	2.6666	12

## Sheet: Figure S2D
Figure 2-figure supplement 1D. hsp-6::GFP expression.
luci	luci;AA	hxk-1i	hxk-2i	hxk-3i	ogdh-1i	sucl-1i	suca-1i	sucl-2i	sucg-1i
0.5	4.28	2.86	2.16	6.3	4.28	4.14	1.37	4.72	0.346
0.12	4.72	1.15	2.12	2.35	3.72	4.11	2.59	5.6	1.103
2.33	6.62	1.38	2.69	3.79	5.53	4.17	2.43	3.88	1.47
3.55	7.78	3.68	2.33	4.4	4.39	5.45	3.97	6.54	2.618
2.05	5.71	2.36	2.07	3.86	4.4	7.14	3.16	2.99	1.598
2.81	11.86	2.92	2.66	12.25	3.86	6.35	4.55	6.06	1.818
2.19	12.29	2.35	2.63	3.45	14.71	4.92	4.12	6.64	2.465
2.64	14.28	1.56	3.38	3.64	5.17	4.92	3.87	5.13	1.869
3.63	12.21	3.65	4.2	4.91	4.58	4.39	5.05	4.4	2.573
2.09	12.2		3.59	4.69	7.51	5.28	6.09	3.76	2.24
3.07	16.23		4.5	4.45	4.41	4.34	6.75	8.23	5.059
3.42	8.22		4.87	4.14	4.62	4.72	4.86	8.5	3.184
4.46	5.6		4.35	6.8	9.2	6.29	4.27	4.56	3.135
3.76	7.79		4.11	6.96	5.65	4.41	5.24	5.39	7.321
3.45	7.67		5.71	5.84	4.33	9.36	4.55	7.17	3.463
3.41	7.98		5.02	4.94	3.73	8.94	5.41	5.77	4.61
4.2	13.24		3.94	6.38	4.01	6.67	3.86	6.17	3.56
3.4	10.43		4.4	3.95	4.16	4.41	4.83	7	3.783
4.96	9.94		4.6	6.85	3.81	7.16	3.17	4.76	2.201
4.16	4.66		4.03	4.39	3.47	5.45	4.26	5.14	2.927
	6.07		3.17				2.78	6.6	2.233
	7.89								2.496

## Sheet: Figure S2E
Figure 2-figure supplement 1E. MML-1::GFP nuclear localization under hxk-2 knockdown and Antimycin A.
luci; Control	luci; AA	hxk-2i; Control	hxk-2i; AA
1.798	1.6	1.564	1.182
1.562	1.187	0.814	0.914
3.133	1.63	0.923	1.074
1.432	1.617	0.905	1.963
3.836	1.702	1.041	1.156
2.704	2.302	1.439	1.755
2.455	2.389	0.878	1.149
2.079	1.457	0.721	0.746
2.973	2.052	1.449	0.803
3.598	1.412	0.687	1.615
2.206	1.792	1.208	1.218
7.523	1.604	1.533	1.615
2.608	1.62	0.933	1.144
2.699	1.874	0.724	0.789
1.946	2.874	0.818	0.918
2.189	3.005	1.162	1.185
1.592	1.703	0.823	0.785
1.491	1.084	0.779	0.862
1.737	1.324	1.077	1.527
2.089	1.161	1.417	1.667
1.404	1.842	1.924	0.449
2.454	1.827	1.581	0.833
1.567	1.885	1.164	0.547
1.462	1.972	1.117	1.207
1.355	1.323	1.054	0.961
1.956	1.307	1.123	1.195
2.084	1.647	1.176	0.995
1.185	1.521	1.724	1.197
1.778	1.854	2.504	1.108
1.817	1.421	1.591	1.218
2.1	1.272	1.273	0.887
1.565	1.065	1.519	0.801
2.137	1.979	1.107	1.161
1.735	2.072	0.82	0.713
1.869	1.56	0.756	2.343
2.532	1.735	1.084	2.349
1.126	3.32	1.656	1.073
1.702	2.471	0.994	2.11
1.757	2.408	1.057	1.396
1.824	1.563	1.786	1.615
1.76	2.176	0.739	1.568
1.233	3.016	0.778	0.975
1.962	3.037	0.801	1.566
1.987	2.651	0.657	0.682
1.219	3.07	1.03	1.357
1.578	1.678	0.708	0.948
1.724	2.42	0.879	0.707
1.817	1.843	0.51	0.725
1.902	1.474	1.275	1.661
1.864	1.276	0.699	1.527
1.806	2.913	1.098	1.238
1.76	2.512	0.995	1.159
2.212	1.678	0.896	1.023
2.732	2.737	0.725	1.067
1.873	2.493	1.03	0.734
3.109	2.816	0.962	1.136
2.239	2.432	1.137	1.287
1.355	2.237	1.206	0.87
1.995	2.401	1.171	1.085
2.676	2.619	1.222	0.715
3.005	2.49	1.97	1.171
4.553	2.453	0.816
2.181	2.32	1.102
3.529	2.502
	2.454
	3.553
	2.572
	2.284
	2.911
	2.542
	2.645
	2.946
	3.703
	2.147
	3.319
	2.853
	1.77

## Sheet: Figure S2F
Figure 2-figure supplement 1F. gst-4p::GFP expression under paraquat treatment.
CL2166 0 mM for 6h	CL2166 15 mM for 6h	CL2166 35 mM for 6h
478071	839933	982957
493303	1061260	880452
549257	1061464	1137520
526865	1429289	1352828
644317	1370424	1052905
525982	1607888	1382294
486280	1172420	1367498
534152	1101512	1432449
609569	1155380	1484399
496230	979041	1310083

## Sheet: Figure S2G
Figure 2-figure supplement 1G. MML-1::GFP nuclear localization under paraquat treatment.
Paraquat, 0 mM	Paraquat, 15 mM	Paraquat, 30 mM
3.39	3.79	3.62
2.05	6.15	1.68
2.74	6.33	1.71
2.18	2.86	2.18
3.61	1.93	3.11
3.36	2.43	2.1
1.59	5.95	1.83
2.69	7.02	2.23
2.5	5.25	4.4
2.57	3.72	1.41
3.28	3.93	1.2
2.9	0.93	2.33
0.97	5.01	1.87
0.8	4.58	3.62
1.74	0.9	2.51
2.62	1.89	2.71
2.26	3.48	2.73
2.46	1.51	1.87
1.29	1.25	5.49
1.69	1.94	3.72
1.82	1.56	2.85
1.72	0.99	5.86
1.64	1.9	4.3
1.65	1.61	0.89
1.35	3.53	0.97
2.62	3.79	6.35
1.82	4.81	5.36
1.8	1.39	2.69
2.09	1.64	3.07
1.24	3.15	2.43
5.44	1.26	3.08
2.92	2.1	1.59
2.54	1.44	3.01
1.07	2.76	1.12
1.19	1.86	1.73
1.83	1.58	1.65
2.12	3.93	4.78
3.29	3.29	1.88
1.57	1.1	2.76
1.34	2.82	1.87
2.46	1.68	2
1.05	2.01	2.69
2.51	3.43	3.63
3.17	2.58	4.72
1.78	2.64	2.04
1.43	2.97	1.89
1.97	3.43	2.89
3.3	1.26	1.69
2.23	1.52	2.9
2.13	2.26	1.4
2.46	1.53	3.26
2.92	1.32	2.68
1.7	1.33	1.45
2.34	2.22	1.5
1.65	2.32	1.92
2.91	3.42	2.28
3.29	3.07	1.54
1.77	2.63	4.32
1.87	1.48	2.52
2.42	2.47	2.47
2.06	2.25	2.64
2.03	2.09	2.85
2.26	2.03	2.54
1.87	1.24	2.98
2.74	1.24	1.15
6.44	1.47	1.29
2.25	1.89	0.79
2.23	1.47	2.78
2.02	1.44	3.08
1.96	1.85	2.43
1.83	2.59	2.01
4.4	2.04	2.55
1.84	1.92	2.86
2.69	1.81	1.61
3.72	3.08	1.23
1.44	2.83	1.32
1.33	3.35	2.11
3.1	1.75	3.1
2.23	2.71	2.92
2.22	1.94	5.03
1.38	1.5	6.31
1.61	1.37	4.23
2.83	2.51	4.3
1.79	2.7	2.93
1.76	3.18	3.08
1.84	2.52	4.9
2.13	3.75	2.73
1.39	3.29	1.94
1.63	2.61	1.92
1.29	4.09	1.46
1.35	4.49	1.95
2.81	2.95	2.64
1.31	4.32	2.37
1.07	4.89	2.15
4.17	4.56	1.82
3.52	3.56	1.96
1.86	4.94	3.79
3.82	1.7	2.82
4.72	1.15	3.23
3.27	1.36	1.85
3.33	1.38	2.03
2.25	2	2.18
4.58	4.28	1.91
3.28	4.1	2.97
2.58	1.81	2.92
3.17	1.91	2.46
1.91	2.25	1.99
5.72	1.73
6.52	1.75
5.03	2.83
4.23	5.04
7.78	1.93
2.62	0.9
5.51	5.34
4.95	4.92
2.32	3.65
3.79	6.49
2.66	3.99
1.98	3.7
1.49	1.56
1.52	1.59
3.44	3.05
1.9	3.49
3.17	3.95
1.63	2.55
2.96	2.96
0.86	6.36
0.91	1.3
2.55	2.38
1.44	4.48
1.13	1.61
1.59	2.02
	1.27

## Sheet: Figure S2H
Figure 2-figure supplement 1H. BODIPY intensity in wiltype and glp-1 under hexokinase knockdown.
N2; luci	N2; hxk-1i	N2; hxk-2i	N2; hxk-3i	glp-1; luci	glp-1; hxk-1i	glp-1; hxk-2i	glp-1; hxk-3i
13.562	20.141	25.999	19.439	20.277	22.478	23.46	31.752
23.225	18.018	24.752	20.687	20.567	19.768	29.083	30.606
17.647	18.081	30.389	19.204	16.909	19.627	29.436	26.599
22.929	21.902	27.074	27.379	23.89	20.914	31.682	37.829
24.671	24.85	33.186	25.558	22.544	16.942	36.258	28.744
20.589	23.204	26.111	30.536	26.988	20.529	24.981	33.681
25.549	24.785	29.155	30.209	19.235	23.97	33.28	36.324
23.203	24.91	34.121	25.223	22.199	25.938	33.014	30.34
21.893	30.385	39.251	27.344	21.8	25.066	38.891	31.293
19.086	31.046	32.207	28.834	20.132	27.125	34.198	37.228
28.557	28.259	34.901	30.685	23.639	33.842	35.247	38.667
25.017	36.272	35.285	35.03	24.376	28.26	37.053	43.227
20.108	33.101	34.38	32.644	22.398	30.976	38.967	40.676
30.646	32.015	36.728	40.198	23.353	20.442	37.132	45.23
23.707	28.964	43.258	37.381	21.883	25.098	35.138	42.315
29.607	37.559	37.166	31.656	24.548	24.897	42.178	45.284
34.473	32.458	45.602	26.665	22.488	25.859	33.267	38.035
34.034	36.564	29.19	28.311	18.484	23.13	35.24	32.66
32.735	43.525	40.227	40.287	26.711	32.42	39.921	32.965
31.361	39.461	35.89	38.914	21.345	31.288	36.458	27.53
26.334	33.415	32.802	28.46	20.459	31.677	29.879	38.671
19.905	30.582	33.399	30.832	18.37	38.514	34.925	36.379
23.986	33.203	28.858	34.45	17.191	35.172	33.594	37.051
24.202	34.192	24.987	31.136	16.479	27.921	32.477	38.931
17.821	37.364	27.184	31.475	20.075	29.046		45.347
28.177	31.467	30.884	25.911	20.472	31.312		40.775
19.369	23.001	26.252			32.736		34.847
19.869	28.78				33.036		32.976
19.568	28.001				24.767
22.819	31.82				28.183
	29.792				26.844
					23.877
					22.098
					24.146

## Sheet: Figure S2I
Figure 2-figure supplement 1I. acs-2p::GFP expression under hexokinase knockdown.
luci	hxk-1i	hxk-2i
0.9	3.53	2.87
1.59	2.79	2.61
1.73	2.79	3.23
1.83	2.33	2.5
0.76	4.29	4.2
2.88	3.29	2.63
2.07	2.25	5.07
1.69	5.09	5.43
1.79	2.83	3.19
2.8	2.82	1.29
3.6	2.4	2.91
2.08	1.62	2.77
1.78	2.8	3.52
1.39	3.11	1.92
3.09	2.96	4.61
2.64	2.33	1.64
3.39	2.15	2.52
5.39	3.69	4.5
2.81	3.09	5.92
3.7	2.95	2.87
	4.15	5.86
