# Supplementary material for: Hexokinase regulates Mondo-mediated longevity via the PPP and organellar dynamics
Source: eLife. 2025 Aug 11;12:RP89225. doi: 10.7554/eLife.89225 (PMC12339002; doi:10.7554/eLife.89225)
Supplement: Figure 2—source data 1. [file elife-89225-fig2-data1.xlsx]

## Sheet: Figure 2E
Figure 2E. Intensity plot of ROI from Figure 2D
Distance (microns)	MML-1::GFP	TOMM-20::mCherry
0	115	0
0.00929	98.405	26.136
0.01858	79.487	81.27
0.02787	65.259	142.536
0.03717	68.599	190.926
0.04646	90.337	209.318
0.05575	128.67	204.558
0.06504	179.077	181.614
0.07433	232.612	170.954
0.08362	278.066	190.046
0.09291	308.161	235.148
0.1022	320.882	308.942
0.1115	330.119	395.334
0.12079	353.681	466.832
0.13008	411.194	511.784
0.13937	521.886	522.578
0.14866	694.211	516.002
0.15795	924.521	514.414
0.16724	1204.12	530.578
0.17654	1519.89	571.708
0.18583	1852.21	621.056
0.19512	2183.58	677.996
0.20441	2487.47	736.236
0.2137	2727.43	811.404
0.22299	2920.46	897.108
0.23228	3071.62	981.612
0.24157	3190.32	1055.87
0.25087	3309.35	1110.29
0.26016	3464.12	1122.15
0.26945	3678.59	1103.43
0.27874	3986.43	1075.39
0.28803	4360.58	1072
0.29732	4748.68	1138.24
0.30661	5128	1300.94
0.31591	5416.55	1490.25
0.3252	5630.56	1676.93
0.33449	5806.98	1806.63
0.34378	5976.95	1867.69
0.35307	6148.77	1939
0.36236	6355.14	2056.3
0.37165	6540.95	2267.52
0.38094	6692.65	2576.55
0.39024	6791.44	2903.91
0.39953	6822.21	3183.22
0.40882	6764.59	3385.29
0.41811	6605.16	3548.64
0.4274	6411.88	3708.66
0.43669	6230.33	3891.09
0.44598	6128.09	4105.92
0.45528	6111.48	4280.32
0.46457	6123.05	4392.41
0.47386	6158.48	4420.08
0.48315	6147.23	4353.1
0.49244	6100.99	4277.83
0.50173	6060.58	4230.92
0.51102	6046.88	4232.71
0.52031	6101.98	4271.86
0.52961	6235.84	4328.16
0.5389	6426.54	4381.66
0.54819	6627.19	4423.43
0.55748	6789.35	4434.67
0.56677	6857.71	4441.84
0.57606	6842.95	4436.07
0.58535	6713.29	4395.96
0.59465	6476.46	4319.21
0.60394	6178.67	4214.31
0.61323	5855.82	4068.82
0.62252	5554.67	3837.96
0.63181	5304.88	3621.82
0.6411	5130.51	3455.5
0.65039	5011.23	3379.32
0.65968	4924.88	3395.35
0.66898	4830.59	3424.6
0.67827	4702.72	3412.92
0.68756	4538.54	3340.12
0.69685	4322.11	3240.44
0.70614	4084.95	3151.58
0.71543	3854.53	3091.76
0.72472	3662.69	3089.11
0.73401	3515.66	3084.24
0.74331	3411.95	3099.05
0.7526	3379.7	3152.95
0.76189	3410.56	3226.73
0.77118	3516.31	3323.01
0.78047	3672.94	3393.88
0.78976	3810.17	3405.64
0.79905	3898.58	3318.93
0.80835	3893.19	3137.27
0.81764	3780	2874.82
0.82693	3622.89	2584.51
0.83622	3475.83	2340.49
0.84551	3376.57	2172.77
0.8548	3367.25	2114.49
0.86409	3452.03	2177.36
0.87338	3568.92	2275.28
0.88268	3703.49	2393.38
0.89197	3846.04	2522.66
0.90126	3961.37	2656.28
0.91055	4031.92	2804.86
0.91984	4051.82	2936
0.92913	4054.92	3032.16
0.93842	4035.98	3077.23
0.94772	4009.84	3061.75
0.95701	3994.52	3011.71
0.9663	4011.87	2944.02
0.97559	4080.73	2885.98
0.98488	4224.37	2868.99
0.99417	4427.42	2922
1.00346	4639.08	3055.41
1.01275	4854.48	3210.81
1.02205	5064.94	3338.12
1.03134	5218.26	3355.38
1.04063	5323.89	3242.21
1.04992	5374.45	3073.97
1.05921	5375.38	2896.71
1.0685	5372.95	2746.83
1.07779	5429.87	2663.7
1.08709	5555.41	2618.5
1.09638	5719.77	2633.18
1.10567	5853.41	2713.7
1.11496	5917.49	2847.95
1.12425	5902.35	3057.53
1.13354	5820.85	3335.26
1.14283	5709.26	3626.06
1.15212	5579.17	3935.54
1.16142	5447.72	4259.62
1.17071	5365.81	4561.65
1.18	5328.48	4796.32
1.18929	5383.83	4834.02
1.19858	5520.75	4641.51
1.20787	5726.01	4287.05
1.21716	5983.41	3824.77
1.22646	6253	3436
1.23575	6527.71	3228.21
1.24504	6764.03	3136.39
1.25433	6962.61	3146.91
1.26362	7142.68	3198.2
1.27291	7296.27	3229.41
1.2822	7425.05	3256.03
1.29149	7508.31	3272.42
1.30079	7491.28	3229.81
1.31008	7391.77	3121.54
1.31937	7243.48	2971.32
1.32866	7068.94	2775.88
1.33795	6889.3	2545.81
1.34724	6716	2328.05
1.35653	6551.04	2135.43
1.36583	6417.26	1984.43
1.37512	6330.33	1915.29
1.38441	6339.22	1907.05
1.3937	6434.82	1926.93
1.40299	6599.17	1945.5
1.41228	6743.32	1931.09
1.42157	6737.26	1851.17
1.43086	6597.06	1749.29
1.44016	6356.46	1654.72
1.44945	6151.2	1591.04
1.45874	6068.31	1555.95
1.46803	6106.24	1522.17
1.47732	6248.62	1464.02
1.48661	6369.08	1366.72
1.4959	6395.41	1215.93
1.5052	6205.32	1062.32
1.51449	5842.8	952.598
1.52378	5403.22	889.676
1.53307	4944.88	878
1.54236	4594.56	903.684
1.55165	4324.44	892.406
1.56094	4100.99	834.128
1.57023	3870.04	723.13
1.57953	3626.37	603.206
1.58882	3381.04	503.098
1.59811	3192.71	439.482
1.6074	3073.53	414.05
1.61669	2999.8	413.518
1.62598	2945.95	451.102
1.63527	2865.24	531.648
1.64457	2753.87	639.108
1.65386	2606.48	741.92
1.66315	2436.78	776.202
1.67244	2246.73	751.75
1.68173	2023.42	687.046
1.69102	1762.04	615.742
1.70031	1489.93	590.618
1.7096	1234.25	623.66
1.7189	1036.74	685.236
1.72819	911.175	732.59
1.73748	847	744

## Sheet: Figure 2F
Figure 2F. Manders' Colocalization Coefficient of MML-1::GFP colocalization with TOMM-20::mCherry.
tM1	tM2	tM1	tM2
34.6	4.2	99.9	18.9
9.2	2	47.3	9
39.6	16.9	93.9	16
11.6	2.5	99.2	2.8
12	1.3	94.6	4
60.9	7.3	99.4	6.2
14.1	5.5	0.1	0
14.5	2.4	99.9	12.2
0.1	0	72.6	8.1
2.3	0.6	93.6	2.6
14	3.2	100	5.2
11.3	2	65.5	1.9
4.1	1.8	43	1.1
26.5	2.7	0.7	0.3
9.8	2.7	60.3	6.3
3.5	3.1	27	1.1
19.6	1.9	28.5	2.7
2.2	0.9	27	1.1
0.2	0.2	28.3	3.9

## Sheet: Figure 2H
Figure 2H. OCR of wildtype and glp-1 under hexokinase knockdown.
N2; luci	N2; hxk-1i	N2; hxk-2i	N2; mml-1i	glp-1; luci	glp-1; hxk-1i	glp-1; hxk-2i	glp-1; mml-1i
20.24	21.57	20.32	20.77	12.93	17.2	15.17	19.61
21.47	22.24	21.7	21.44	13.82	16.89	15.71	16.49
22.03	21.96	23.21	22.46	14.32	16.39	16.12	17.59

## Sheet: Figure 2I
Figure 2I. Mitochondrial b-oxidation of wildtype and glp-1 under hexokinase knockdown.
N2; luci	N2; hxk-1i	N2; hxk-2i	N2; mml-1i	glp-1; luci	glp-1; hxk-1i	glp-1; hxk-2i	glp-1; mml-1i
13.53	31.15	18.63	10.72	-5	5.41	7.71	12.44
13.93	32.22	18.95	10.53	-5.43	5.43	7.79	14.26
14.62	35.12	16.98	9.87	-4.98	5.86	7.02	13.65

## Sheet: Figure 2J
Figure 2J. MML-1::GFP nuclear localization with hexokinase double knockdown with acs-2i.
luci	hxk-1i luci	hxk-2i luci	acs-2i luci	hxk-1i acs-2i	hxk-2i acs-2i
1.22	0.65	1.04	1.2	2.12	0.98
0.92	1.91	0.82	1.2	1.11	1.05
1.56	0.91	0.85	1.18	1.13	0.97
1.31	1.68	1.06	2.56	1.08	0.94
1.88	1.41	1.26	2.04	1.13	1.25
1.79	1.4	1.17	1.2	1.3	0.86
1.78	1.63	0.92	1.58	1.21	1.13
1.64	1.63	1.33	1.62	1.44	1.11
2.13	1.07	1.39	1.83	1.18	0.69
1.72	1.51	1.03	1.24	2.24	0.76
1.33	1.82	1	1.19	2.4	1.13
1.19	0.83	1.32	2.3	1.71	0.92
1.83	0.98	1.13	2.16	1.33	1.27
2.79	1	0.89	2.15	1.64	0.99
2.03	0.72	0.97	2.08	1.53	1.34
2.21	1.46	0.87	2.06	1.56	1.12
1.31	1.35	0.88	1.16	1.22	0.91
1.6	0.61	1.01	2.07	2.9	1.15
1.63	0.8	0.76		1.08	0.9
1.6	1.43	1.04		2.01	0.96
2.52	1.58	1.11		1.18	1.06
2.07	1.72	0.97		1.16	0.98
1.55	1.51	0.87		1.81	1
1.68	0.59	1.07		1.71	0.76
1.33	1.96	0.78		1.3	0.84
1.67	0.85	0.97		2.03	1.38
1.77	1.5	1.24		1.05	1.01
1.57		1.37		1.07	1.05
1.32		1.23		1.02	0.86
1.01		1.01		1.42	1.01
1.25		0.89		1.27	1.1
1.18		1.05		1.3	1.05
1.97		1.17		2.89	0.82
1.66		1.19		1.55	1.07
1.86		1.07		2.08	1.03
1.93		1.09		2.18	1.16
1.47		1.04		1.24
1.37		0.61		1.17
1.33		0.83		1.01
1.45		0.86		2.91
1.91		0.89		2.5
1.74		0.99		2.6
1.72		0.97		2.17
2.03		1.05
1.7
1.16
2.24
2.1
1.6
2.22
1.83
1.85
1.65
1.57
2
2.24
2.47
3.07
1.96
1.9
2.12

## Sheet: Figure 2K
Figure 2K. MML-1::GFP nuclear localization with hexokinase knockdown and etomoxir.
luci; Control	luci; Etomoxir	hxk-1i; Control	hxk-1i; Etomoxir	hxk-2i; Control	hxk-2i; Etomoxir
1.782	1.791	1.053	2.528	1.233	0.964
1.515	1.203	1.037	1.823	1.556	0.956
1.402	2.165	1.043	1.872	0.763	0.924
1.68	1.577	1.189	1.82	1.153	0.879
1.62	1.932	0.962	1.513	1.237	0.792
1.537	1.834	1.29	1.889	0.654	0.992
2.007	1.904	1.29	0.999	1.323	1.206
3.235	1.891	1.441	1.414	0.949	1.328
3.097	2.182	0.913	1.619	1.159	1.29
2.094	1.143	0.846	3.004	1.036	0.916
1.586	2.174	1.068	3.44	1.081	0.936
1.095	1.992	0.962	1.407	1.062	1.168
1.898	1.684	0.984	1.568	0.867	1.143
2.651	2.14	0.872	1.814	1.059	0.867
1.278	2.24	1.436	2.303	2.267	0.945
2.089	1.607	1.175	2.139	1.205	1.466
3.16	2.897	1.052	2.055	1.133	0.715
2.63	2.059	1.221	0.704	0.803	0.892
1.616	1.871	0.789	0.948	0.836	1.235
1.379	1.412	0.549	2.279	1.014	0.904
1.794	1.601	1.037	1.358	0.94	0.899
0.821	2.558	1.228	0.789	0.971	1.048
1.532	1.68	1.196	1.115	1.11	1.003
2.566	4.063	1.174	1.365	1.334	0.865
1.569	4.414	0.781	1.349	1.441	0.928
0.894	2.375	1.315	1.178	0.866	1.102
1.391	2.12	1.407	1.868	1.107	0.824
1.423	1.636	1.387	1.86	1.069	0.72
1.353	1.496	1.152	1.492	0.956	0.983
2.715	1.571	1.504	1.515	0.998	1.236
0.597	1.103	1.435	2.275	1.009	1.098
1.39	1.119	1.572	2.632	1.331	1.233
1.412	1.501	1.293	2.455	1.163	0.829
2.201	1.255	1.899	0.964	1.466	0.799
2.06	1.485	1.78	1.186	1.324	1.569
2.56	1.418	1.795	0.881	1.388	0.963
1.31	1.257	1.228	0.77	0.865	1.01
3.163	1.024	1.192	0.97		1.097
1.271	2.08	1.501	1.75		1.013
1.468	1.314	1.294	2.748		0.811
1.921	1.762	0.787	1.894		0.61
1.739	2.151	1.01	1.532		0.867
1.738	1.527	1.511	2.042		1.094
1.429	1.226	1.343			1.073
1.346	3.035	0.696			1.011
1.559	1.764	1.479			1.04
1.795	2.686				0.755
	1.973				1.031
	2.291
	2.745
	1.331
	0.913
	1.076
	1.573
	1.135
	1.727
	1.614
	1.333
	1.304
	1.295
	1.514
	1.293
	1.222
	1.987
	1.598
	1.573
	1.527
