# Supplementary material for: Hexokinase regulates Mondo-mediated longevity via the PPP and organellar dynamics
Source: eLife. 2025 Aug 11;12:RP89225. doi: 10.7554/eLife.89225 (PMC12339002; doi:10.7554/eLife.89225)
Supplement: Figure 3—figure supplement 1—source data 1. [file elife-89225-fig3-figsupp1-data1.xlsx]

## Sheet: Figure S3A
Figure 3-figure supplement 1A. MML-1::GFP nuclear localization under PPP and hxk-1 knockdown.
luci	hxk-1i luci	T25B9.9i luci	tkt-1i luci	hxk-1i T25B9.9i	hxk-1i tkt-1i
2.32	0.86	3.221	4.765	1.181	1.402
2.67	0.59	4.849	4.721	1.173	1.748
3.61	1.06	5.958	5.335	1.617	1.717
3.1	0.55	3.94	5.65	1.32	1.53
2.63	0.82	5.67	4.87	1.78	1.17
2.76	1.03	3.39	4.72	1.93	1.2
2.44	0.62	4.93	5.38	1.87	1.6
1.39	0.4	4.57	5.92	1.08	1.61
3.8	0.5	4.65	5.66	1.49	1.59
3.28	1.25	4.4	5.52	1.9	1.7
3.27	0.58	4.59	5.97	0.66	1.84
2.13	1.01	5.86	4.21	0.64	2.37
2.87	0.799	5.78	4.89	1.27	2.76
2.81	0.68	4.98	5.62	0.23	1.85
1.41	0.18	4.35	4.5	2.13	1.21
2.36	0.88	5.54	5.46	1.74	1.94
2.73	0.46	3.64	5	1.28	1.09
2.75	0.53	4.62	5.69	1.014	2.29
2.05	0.48	4.81	3.59	0.88	1.23
3.76	1.23	5.2	5.18	0.72	1.75
3.74	0.27	4.39	5.68	0.99	2.48
2.95	0.2	6.38	5.34	0.56	1.93
2.04	0.83	4.03	5.99	0.93	1.62
1.84	0.9	3.92	4.88	1.6	1.9
1.59	0.59	6.73	4.85	0.89	2.36
2.03	0.58	5.07	5.56	1.61	1.23
1.23	1.17	4.34	4.8	1.35	1.98
2.81	0.34	3.99	5.98	1.38	2.22
1.48	0.31	5.01	6.45	1.86	1.37
1.66	0.89	4.84	4.52	1.2	1.85
2.94	0.78	3.7	4.14	0.72	1.58
2.75	1.07	4.59	5.9	1.15	1.66
3.25	0.79	5.08	5.46	1.16	2.11
2.82	0.25	4.99	5.46	0.85	1.55
2.43	1.37	3.81	4.23	0.53	1.54
2.77	0.76	6.09	5.06	1.27	1.44
1.44	0.63	3.89	5.71	0.56	1.23
2.55	0.42	4.8	4.67	1.01	0.64
2.6	0.28	5.45	5.18	0.83	1.29
3.01	0.21	4.72	3.24	0.73	2.38
2.44	0.11	5.72	5.8	0.99	1.58
2.54	0.32	6.62	3.92	1	1.58
1.57	0.72	5.47	3.78		1.04
2.85	0.97	5.38	5.89		1.36
1.18	1.15	3.93	5.47		0.99
2.61	0.25	5.89	4.52		0.94
2.75	0.68	4.63	4.63		2.03
3.45	0.69	4.75	5.59		1.48
3.11		4.54	5.73		1.92
3.17		6.16	4.9		1.33
1.25		6.14	4.45		0.97
3.56			4.64		1.5
			5.25		1.26
					1.2
					1.61
					2.06
					1.63

## Sheet: Figure S3B
Figure 3-figure supplement 1B. lgg-2 expression in glp-1 under PPP and hxk-2 knockdown.
N2; luci	glp-1; luci	glp-1; hxk-2i luci	glp-1; T25B9.9i luci	glp-1; hxk-2i T25B9.9i	glp-1; tkt-1i luci	glp-1; hxk-2i tkt-1i	glp-1; mml-1i luci
1	3.014	1.325	3.59	2.587	4.874	3.254	1.138
1	2.785	0.879	3.245	2.047	3.478	2.847	1.041
1	2.631	1.111	3.611	3.574	3.981	4.149	1.141

## Sheet: Figure S3C
Figure 3-figure supplement 1C. swt-1 expression in glp-1 under PPP and hxk-2 knockdown.
N2; luci	glp-1; luci	glp-1; hxk-2i luci	glp-1; T25B9.9i luci	glp-1; hxk-2i T25B9.9i	glp-1; tkt-1i luci	glp-1; hxk-2i tkt-1i	glp-1; mml-1i luci
1	4.245	0.974	4.314	5.369	6.489	5.555	1.138
1	3.589	1.132	3.458	5.324	6.471	4.254	1.041
1	2.487	0.887	4.974	4.114	4.75	5.991	1.141

## Sheet: Figure S3D
Figure 3-figure supplement 1D. fat-5 expression in glp-1 under PPP and hxk-2 knockdown.
N2; luci	glp-1; luci	glp-1; hxk-2i luci	glp-1; T25B9.9i luci	glp-1; hxk-2i T25B9.9i	glp-1; tkt-1i luci	glp-1; hxk-2i tkt-1i	glp-1; mml-1i luci
1	8.547	4.354	9.398	8.365	11.201	10.254	6.314
1	10.69	5.324	7.584	9.658	8.475	7.258	5.102
1	8.14	6.47	9.85	8.111	8.423	7.251	4.571

## Sheet: Figure S3E
Figure 3-figure supplement 1E. mdl-1 expression in glp-1 under PPP and hxk-1 knockdown.
N2; luci	glp-1; luci	glp-1; hxk-1i luci	glp-1; T25B9.9i luci	glp-1; hxk-1i T25B9.9i	glp-1; tkt-1i luci	glp-1; hxk-1i tkt-1i	glp-1; mml-1i luci
1	6.014	1.258	8.59	3.174	7.874	2.687	1.138
1	5.785	0.687	6.245	2.301	6.478	1.258	1.041
1	5.431	0.574	6.611	2.787	8.281	1.017	1.141

## Sheet: Figure S3F
Figure 3-figure supplement 1F. lgg-2 expression in glp-1 under PPP and hxk-1 knockdown.
N2; luci	glp-1; luci	glp-1; hxk-1i luci	glp-1; T25B9.9i luci	glp-1; hxk-1i T25B9.9i	glp-1; tkt-1i luci	glp-1; hxk-1i tkt-1i	glp-1; mml-1i luci
1	3.014	1.274	3.59	2.547	4.874	2.211	1.138
1	2.785	1.589	3.245	1.356	3.478	1.914	1.041
1	2.631	1.347	3.611	1.314	3.981	1.02	1.141

## Sheet: Figure S3G
Figure 3-figure supplement 1G. swt-1 expression in glp-1 under PPP and hxk-1 knockdown.
N2; luci	glp-1; luci	glp-1; hxk-1i luci	glp-1; T25B9.9i luci	glp-1; hxk-1i T25B9.9i	glp-1; tkt-1i luci	glp-1; hxk-1i tkt-1i	glp-1; mml-1i luci
1	4.245	1.654	4.314	2.037	6.489	1.987	1.138
1	3.589	1.365	3.458	1.674	6.471	2.587	1.041
1	2.487	1.147	4.974	1.354	4.75	1.034	1.141

## Sheet: Figure S3H
Figure 3-figure supplement 1H. fat-5 expression in glp-1 under PPP and hxk-1 knockdown.
N2; luci	glp-1; luci	glp-1; hxk-1i luci	glp-1; T25B9.9i luci	glp-1; hxk-1i T25B9.9i	glp-1; tkt-1i luci	glp-1; hxk-1i tkt-1i	glp-1; mml-1i luci
1	8.547	4.3698	9.398	4.587	11.201	5.847	6.314
1	10.69	3.247	7.584	5.321	8.475	4.014	5.102
1	8.14	3.698	9.85	3.987	8.423	4.587	4.571

## Sheet: Figure S3I
Figure 3-figure supplement 1I. G6P levels in glp-1 under PPP and hxk-1 knockdown.
glp-1; luci	glp-1; hxk-1i luci	glp-1; T25B9.9i luci	glp-1; hxk-1i T25B9.9i	glp-1; tkt-1i luci	glp-1; hxk-1i tkt-1i
3.035	1.02	4.275	2.574	3.258	1.147
3.125	1.138	3.159	2.541	3.652	1.348
3.098	1.098	3.047	2.397	3.459	1.428
3.105	0.857	3.256	2.254	3.263	1.124

## Sheet: Figure S3J
Figure 3-figure supplement 1J. Lifespan of wildtype and glp-1 under hxk-2 and T25B9.9 double knockdown.
Days	N2; luci	N2; hxk-2i luci	N2; T25B9.9i luci	N2; hxk-2i T25B9.9i	glp-1; luci	glp-1; hxk-2i luci	glp-1; T25B9.9i luci	glp-1; hxk-2i T25B9.9i
0	1	1	1	1	1	1	1	1
1	1	1	1	1	1	1	1	1
8	0.98	0.99	0.96	0.97	1	1	0.99	1
9	0.92	0.96	0.92	0.95	0.99	1	0.99	0.98
10	0.8	0.91	0.88	0.88	0.98	1	0.99	0.96
11	0.65	0.66	0.82	0.68	0.97	0.91	0.99	0.95
12	0.6	0.56	0.73	0.61	0.97	0.75	0.98	0.93
13	0.55	0.5	0.65	0.57	0.92	0.7	0.98	0.9
15	0.42	0.35	0.52	0.49	0.88	0.5	0.92	0.83
18	0.32	0.2	0.3	0.37	0.81	0.41	0.85	0.77
20	0.21	0.16	0.18	0.28	0.79	0.3	0.8	0.7
22	0.11	0.06	0.1	0.2	0.71	0.14	0.76	0.61
23	0	0.06	0	0.15	0.69	0.09	0.74	0.51
24		0		0.08	0.64	0.04	0.7	0.5
26				0	0.58	0	0.66	0.47
28					0.49		0.55	0.39
30					0.4		0.4	0.3
32					0.29		0.35	0.21
34					0.19		0.23	0.1
36					0.1		0.15	0.02
38					0.05		0.07	0
40					0.02		0.01
42					0		0.01
45							0
