# Supplementary material for: Hexokinase regulates Mondo-mediated longevity via the PPP and organellar dynamics
Source: eLife. 2025 Aug 11;12:RP89225. doi: 10.7554/eLife.89225 (PMC12339002; doi:10.7554/eLife.89225)
Supplement: Figure 3—source data 1. [file elife-89225-fig3-data1.xlsx]

## Sheet: Figure 3B
Figure 3B. MML-1::GFP nuclear localization under 6-aminonicotinamide.
Control	6-AN 500 uM	6-AN 1 mM
4.001	2.372	3.589
1.987	1.893	4.415
4.287	2.646	4.096
2.156	1.95	3.007
2.644	2.629	7.274
3.168	1.893	7.523
2.974	1.557	4.999
4.481	1.696	3.151
2.676	1.851	5.379
4.203	2.482	5.782
2.837	3.434	1.888
5.404	3.214	2.234
3.415	2.851	2.279
3.357	3.602	2.878
2.257	3.363	3.53
3.036	2.664	2.948
2.505	3.474	3.277
3.506	2.67	3.633
2.633	3.06	3.226
3.798	4.036	5.087
3.952	3.319	5.839
6.174	3.623	5.518
3.296	4.101	6.571
3.025	4.03	5.155
3.132	3.879	6.268
2.073	1.67	3.009
2.525	2.055	5.175
2.457	3.535	4.444
4.443	3.199	6.524
3.827	3.605	6.087
4.428	3.306	4.627
4.076	3.23	3.87
4.532	3.995	3.277
3.522	1.71	2.691
3.593	4.178	6.175
2.737	1.795	2.41
1.268	3.359	2.534
1.372	2.468	2.184
2.801	2.449	3.063
1.708	4.77	1.302
2.772	4.318	6.373
1.596	4.166	6.773
1.862	3.347	4.171
2.545	3.954	4.097
2.173	1.616	5.727
3.018	4.863	4.652
2.687	4.008	5.161
4.456	4.232	2.617
2.547	4.384
3.787	4.683
2.872	4.224
1.269	4.806
4.332	3.244
3.634	2.922
1.775	2.749
2.039	4.684
4.626	3.215
3.039	4.109
4.592	5.019
3.236	7.768
4.425	5.261
1.499	8.743
2.618

## Sheet: Figure 3C
Figure 3C. NADPH/NAD+ levels in glp-1 under hexokinase knockdown.
glp-1; luci	glp-1; T25B9.9i	glp-1; hxk-1i	glp-1; hxk-2i
1	0.42	1.24	2.62
1	0.65	1.08	2.12
1.41	0.47	0.85	2.1

## Sheet: Figure 3D
Figure 3D. TKT-1 activity in glp-1 under hexokinase knockdown.
glp-1; luci	glp-1; tkt-1i	glp-1; hxk-1i	glp-1; hxk-2i	glp-1; mml-1i
10.3	3.21	14.9	18.21	9.65
8.24	4	8.24	14.36	9.21
7.98	2.25	10.6	16.84	6.86

## Sheet: Figure 3F
Figure 3F. MML-1::GFP nuclear localiztion under PPP knockdown.
luci	hxk-2i luci	T25B9.9i luci	tkt-1i luci	hxk-2i T25B9.9i	hxk-2i tkt-1i
1.885	1.59	2.746	2.587	3.605	2.616
1.434	1.758	3.162	1.519	2.488	2.251
3.844	1.488	3.101	1.768	1.597	2.164
3.379	1.493	2.998	1.834	1.939	3.978
3.271	1.055	3.221	3.603	2.641	2.804
2.818	2.626	4.849	3.012	0.803	6.27
1.69	1.125	5.958	3.136	5.426	1.399
2.196	0.878	4.417	4.765	3.844	5.078
2.107	1.058	3.237	6.316	2.234	4.431
2.402	1.279	3.568	4.721	2.249	2.398
2.99	1.022	3.536	4.363	3.8	2.564
1.882	1.028	4.398	2.16	4.056	1.206
2.343	1.087	5.495	3.446	4.826	3.251
1.691	0.968	3.703	5.335	3.667	3.395
1.985	0.945	1.968	2.945	3.782	2.773
2.322	0.977	3.54	3.338	2.425	2.467
1.573	0.888	2.584	2.659	1.173	1.155
1.725	1.484	2.758	2.389	1.617	2.175
2.057	0.861	4.24	3.134	1.774	4.633
1.851	0.951	4.215	1.473	3.224	1.928
1.944	1.141	2.726	2.396	4.738	3.756
1.753	1.178	3.359	1.947	1.966	3.961
1.963	1.256	1.42	2.636	2.43	4.142
2.708	1.265	5.902	1.858	2.479	1.748
3.06	1.295	2.547	2.142	6.444	1.717
2.604	1.093	2.411	2.598	1.695	1.995
1.35	1.044	3.84	1.804	2.593	3.088
1.326	1.012	3.025	3.939	3.944	2.461
2.07	1.361	2.868	1.57	3.657	2.196
2.709	1.095	3.898	1.686	4.462	2.274
3.721	1.582	3.13	1.504	2.513	2.485
1.782	1.147	2.201	3.391	2.664	3.493
1.304	0.75	1.518	3.059	2.361	2.172
1.804	1.009	2.349	2.665	1.181	3.783
1.328	1.369	3.992	3.978	2.555	2.184
2.114	0.778	3.547	3.641	1.726	3.957
1.556	0.919	2.408	4.319	4.168	2.511
2.443	0.931	2.862	3.978	4.689	2.071
2.784	1.023	3.267	5.771	2.425	2.934
3.168	1.093	3.119	6.757	2.792	2.464
2.768	1.131	4.478	2.664	3.31	1.748
	0.754	3.095	3.421	2.302	1.804
	0.894	2.097	3.302	2.501	2.806
		2.186	2.081	3.66	2.517
		4.642	1.607	2.334	2.426
		4.207	3.325	2.21	2.469
		4.484	2.093	2.648	2.553
		4.756	2.25	2.877	1.736
		4.82	4.85	4.509	1.666
		3.844	3.947	4.486	3.931
		5.929	3.561	7.52	2.808
		5.267	3.132	5.35	3.204
		7.312	2.816	5.152	1.402
		3.177	3.155	4.654	2.019
		6.181	3.258	2.732	2.404
		5.624	3.45	3.346	3.007
		4.13	2.538	2.955	2.961
		4.822	1.123	3.856	2.252
			3.426	4.253	5.686
			5.066	3.272	4.268
			3.477	3.429	2.518
			3.13	3.259	2.493
			3.276	3.689	3.248
			5.547	6.462	2.991
			4.608	7.566
			3.197	3.765
			3.34	4.491
			4.202	4.993
			3.85
			1.956
			2.715
			1.907
			2.805
			2.42
			1.966
			3.631
			3.481
			2.559
			2.999
			3.458
			1.838
			3.298
			2.958
			3.495
			1.684
			1.743
			2.863
			2.266
			3.572

## Sheet: Figure 3G
Figure 3G. mdl-1 expression in glp-1 under PPP and hxk-2 knockdown.
N2; luci	glp-1; luci	glp-1; hxk-2i luci	glp-1; T25B9.9i luci	glp-1; hxk-2i T25B9.9i	glp-1; tkt-1i luci	glp-1; hxk-2i tkt-1i	glp-1; mml-1i luci
1	6.014	2.244	8.59	7.145	7.874	4.398	1.138
1	5.785	2.146	6.245	6.358	6.478	6.874	1.041
1	5.431	3.194	6.611	7.034	8.281	7.258	1.141

## Sheet: Figure 3H
Figure 3H. G6P levels in glp-1 under PPP and hxk-2 knockdown.
glp-1; luci	glp-1; hxk-2i luci	glp-1; T25B9.9i luci	glp-1; hxk-2i T25B9.9i	glp-1; tkt-1i luci	glp-1; hxk-2i tkt-1i	glp-1; tald-1i luci	glp-1; hxk-2i tald-1i
3.035	1.72	4.275	1.697	3.258	2.445	3.489	1.754
3.125	1.758	3.159	1.743	3.652	2.135	3.589	1.489
3.098	1.647	3.047	1.725	3.459	2.374	3.473	1.748
3.105	1.78	3.256	1.935	3.263	2.298	3.124	1.635

## Sheet: Figure 3I
Figure 3I. Lifespan of wildtype and glp-1 under hxk-2 and tkt-1 double knockdown.
Days	N2; luci	N2; hxk-2i luci	N2; tkt-1i luci	N2; hxk-2i tkt-1i	glp-1; luci	glp-1; hxk-2i luci	glp-1; tkt-1i luci	glp-1; hxk-2i tkt-1i
0	1	1	1	1	1	1	1	1
1	1	1	1	1	1	1	1	1
8	0.98	0.99	0.99	0.95	1	1	0.98	0.98
9	0.92	0.96	0.99	0.82	0.99	1	0.98	0.95
10	0.8	0.91	0.96	0.75	0.98	1	0.97	0.92
11	0.65	0.66	0.92	0.71	0.97	0.91	0.96	0.9
12	0.6	0.56	0.85	0.69	0.97	0.75	0.95	0.89
13	0.55	0.5	0.71	0.65	0.92	0.7	0.95	0.89
15	0.42	0.35	0.6	0.58	0.88	0.5	0.91	0.85
18	0.32	0.2	0.5	0.39	0.81	0.41	0.88	0.8
20	0.21	0.16	0.36	0.33	0.79	0.3	0.86	0.77
22	0.11	0.06	0.22	0.2	0.71	0.14	0.68	0.73
23	0	0.06	0.19	0.12	0.69	0.09	0.64	0.7
24		0	0.13	0.1	0.64	0.04	0.6	0.68
26			0.07	0	0.58	0	0.5	0.6
28			0		0.49		0.4	0.53
30					0.4		0.22	0.38
32					0.29		0.18	0.26
34					0.19		0.1	0.19
36					0.1		0.06	0.11
38					0.05		0.04	0
40					0.02		0
42					0
