# Supplementary material for: Hexokinase regulates Mondo-mediated longevity via the PPP and organellar dynamics
Source: eLife. 2025 Aug 11;12:RP89225. doi: 10.7554/eLife.89225 (PMC12339002; doi:10.7554/eLife.89225)
Supplement: Figure 4—figure supplement 1—source data 1. [file elife-89225-fig4-figsupp1-data1.xlsx]

## Sheet: Figure S4A
Figure 4-figure supplement 1A. Quantified proteins of IP-MS of MML-1::3xFLAG in wildtype and mml-1::3xFLAG.
N2_1	N2_2	N2_3	mml-1::3XFLAG_1	mml-1::3XFLAG_2	mml-1::3XFLAG_3
1644	1720	2045	1749	1769	1711

## Sheet: Figure S4E
Figure 4-figure supplement 1E. Intensity plot of ROI from Figure S4D (LipiBlue and DHS-3::GFP).
Distance (microns)	DHS-3::GFP	LipiBlue
0	1.174	2.28
0.03159	1.174	2.2496
0.06318	1.174	2.16
0.09478	1.174	2.0538
0.12637	1.4333	2.1528
0.15796	2.2828	2.2698
0.18955	4.0761	2.6576
0.22115	8.4058	2.9276
0.25274	15.0194	3.5902
0.28433	23.7758	4.5362
0.31592	33.1329	5.8318
0.34752	40.6361	7.7854
0.37911	44.6965	10.3002
0.4107	44.1111	12.9778
0.44229	39.7261	15.5166
0.47389	33.5764	17.2368
0.50548	28.129	17.8778
0.53707	23.9454	17.6456
0.56866	22.0571	16.9322
0.60026	21.5145	16.6862
0.63185	21.9538	17.0544
0.66344	22.1041	18.0576
0.69503	20.9833	20.0488
0.72662	18.5763	22.8382
0.75822	15.7692	26.2528
0.78981	13.0444	29.7666
0.8214	10.9584	32.7008
0.85299	9.7301	34.749
0.88459	9.392	35.6634
0.91618	9.08	35.8504
0.94777	8.805	35.8872
0.97936	8.6808	35.5714
1.01096	8.1554	35.1044
1.04255	7.2224	34.7052
1.07414	6.2603	34.6008
1.10573	5.5569	35.264
1.13733	5.222	36.7208
1.16892	5.2439	38.5212
1.20051	5.631	39.7132
1.2321	6.3302	39.331
1.26369	6.744	37.2552
1.29529	7.0049	34.208
1.32688	7.0064	31.3382
1.35847	6.8207	29.3192
1.39006	6.6772	28.3554
1.42166	6.457	28.1808
1.45325	6.732	27.9432
1.48484	7.3216	27.2368
1.51643	8.4998	26.023
1.54803	10.6276	24.6092
1.57962	13.6967	23.6106
1.61121	17.7039	23.4348
1.6428	22.6739	23.8308
1.6744	27.9923	24.258
1.70599	33.3087	24.1918
1.73758	39.1464	23.0178
1.76917	45.3566	20.887
1.80077	50.8436	18.0412
1.83236	54.5988	15.1312
1.86395	55.0684	12.4424
1.89554	51.5386	10.3512
1.92713	44.3068	8.6606
1.95873	34.5777	7.2702
1.99032	24.5366	6.156
2.02191	16.0368	5.1076
2.0535	9.8225	4.1446
2.0851	5.8794	3.3652
2.11669	4.0229	2.9396
2.14828	2.8411	2.771
2.17987	2.193	2.9822
2.21147	1.748	3.2174
2.24306	1.4704	3.5538
2.27465	1.1599	3.7392
2.30624	0.7394	3.6966
2.33784	0.587	3.2194
2.36943	0.587	2.964

## Sheet: Figure S4F
Figure 4-figure supplement 1F. Intensity plot of ROI from Figure S4D (LipiBlue and PLIN-1::mCherry).
Distance (microns)	PLIN-1::mCherry	LipiBlue
0	9.086	7.068
0.01916	9.0907	7.3616
0.03833	9.158	7.4814
0.05749	9.3233	7.4896
0.07666	9.24	7.6316
0.09582	9.3314	7.7016
0.11498	9.4178	7.8176
0.13415	9.632	8.0186
0.15331	9.828	8.2196
0.17248	10.136	8.4206
0.19164	10.528	8.6214
0.21081	10.542	8.6486
0.22997	10.374	8.704
0.24913	10.017	8.7684
0.2683	9.625	8.9692
0.28746	9.457	9.122
0.30663	9.3481	9.236
0.32579	9.527	9.3284
0.34495	10.2434	9.4214
0.36412	10.948	9.5104
0.38328	11.872	9.4924
0.40245	12.7889	9.8078
0.42161	14.1549	10.249
0.44078	15.8805	11.0006
0.45994	18.312	12.3448
0.4791	21.1521	14.0654
0.49827	24.6023	16.054
0.51743	28.539	18.0824
0.5366	32.8477	19.9076
0.55576	37.7464	21.4358
0.57492	42.8984	22.7962
0.59409	48.342	24.0308
0.61325	53.9	25.0056
0.63242	58.94	26.0294
0.65158	63.8158	27.0132
0.67075	67.0004	27.9222
0.68991	68.836	29.0052
0.70907	69.04	30.3234
0.72824	67.942	31.7036
0.7474	65.6937	33.404
0.76657	62.881	35.453
0.78573	60.186	37.9214
0.80489	57.806	40.5646
0.82406	55.426	43.2174
0.84322	53.69	45.1612
0.86239	52.311	46.1608
0.88155	50.799	46.4944
0.90072	49.0936	46.4826
0.91988	47.047	46.2646
0.93904	44.681	45.8868
0.95821	41.741	45.3182
0.97737	38.969	44.7908
0.99654	36.764	44.3238
1.0157	34.937	43.807
1.03486	33.7116	43.5826
1.05403	33.187	43.6176
1.07319	33.194	44.0234
1.09236	33.49	44.5152
1.11152	33.6443	44.925
1.13069	33.453	45.144
1.14985	33.2803	45.077
1.16901	32.762	44.7846
1.18818	31.836	44.5756
1.20734	30.884	44.4478
1.22651	29.764	44.7228
1.24567	28.448	45.2058
1.26483	27.202	45.8976
1.284	26.25	46.6334
1.30316	25.4024	47.6868
1.32233	25.0754	48.6452
1.34149	24.8218	49.847
1.36066	24.4974	51.2986
1.37982	24.259	52.8998
1.39898	24.101	54.3838
1.41815	23.8248	55.5062
1.43731	23.499	55.7264
1.45648	23.1625	55.1762
1.47564	22.995	53.96
1.4948	22.5102	52.3724
1.51397	21.6523	50.8208
1.53313	20.8391	49.6152
1.5523	19.754	48.6186
1.57146	18.774	47.809
1.59063	18.046	47.4222
1.60979	17.332	47.1032
1.62895	16.828	46.812
1.64812	16.5357	46.852
1.66728	16.8807	47.2056
1.68645	17.6552	47.5206
1.70561	18.634	47.86
1.72477	19.425	48.0596
1.74394	19.9693	47.907
1.7631	20.202	47.6508
1.78227	19.8399	47.3506
1.80143	19.124	47.2482
1.8206	18.361	47.1162
1.83976	17.437	47.079
1.85892	16.9401	46.9564
1.87809	16.933	46.863
1.89725	16.933	46.8686
1.91642	17.1524	47.0968
1.93558	17.346	47.486
1.95474	17.346	48.2432
1.97391	17.346	48.7338
1.99307	17.073	49.121
2.01224	16.523	48.877
2.0314	15.757	48.22
2.05057	15.0568	47.4318
2.06973	14.483	46.7014
2.08889	14.343	46.0676
2.10806	14.623	46.0366
2.12722	15.1255	46.318
2.14639	15.9683	46.5916
2.16555	16.7646	46.798
2.18471	17.584	47.0144
2.20388	18.144	47.3464
2.22304	18.704	47.8374
2.24221	19.2383	48.6696
2.26137	19.411	49.476
2.28053	19.2383	50.388
2.2997	18.72	51.135
2.31886	18.2973	51.3502
2.33803	17.626	51.2034
2.35719	17.36	50.4032
2.37636	17.528	49.4636
2.39552	17.7185	48.6478
2.41468	18.193	48.1496
2.43385	18.557	48.1572
2.45301	18.8356	48.7402
2.47218	19.3128	49.422
2.49134	19.5764	49.8842
2.5105	19.824	50.017
2.52967	19.824	49.6306
2.54883	19.775	49.022
2.568	19.537	48.2704
2.58716	18.977	47.8678
2.60633	18.774	47.8632
2.62549	18.5798	48.219
2.64465	18.2503	48.336
2.66382	18.172	48.22
2.68298	18.0819	47.6022
2.70215	18.137	46.5404
2.72131	18.557	45.1634
2.74047	19.3149	43.9576
2.75964	20.0809	42.8226
2.7788	20.8863	42.1288
2.79797	21.6996	42.0834
2.81713	22.12	42.7126
2.8363	22.484	43.8334
2.85546	22.9427	45.2986
2.87462	23.87	46.8202
2.89379	25.1811	47.8286
2.91295	26.845	48.1014
2.93212	28.497	47.4104
2.95128	29.512	46.1656
2.97044	29.8471	44.5992
2.98961	29.288	42.9684
3.00877	27.818	41.4072
3.02794	26.1362	40.2506
3.0471	24.6726	39.6012
3.06627	23.5681	39.4824
3.08543	23.3559	39.742
3.10459	24.0666	40.389
3.12376	25.4092	41.3912
3.14292	26.915	42.6344
3.16209	28.371	43.803
3.18125	29.701	44.5838
3.20041	30.534	44.6678
3.21958	30.6868	44.0546
3.23874	31.038	42.7318
3.25791	30.912	41.1096
3.27707	31.164	39.471
3.29624	31.6606	38.0526
3.3154	32.4439	36.9978
3.33456	33.7043	36.186
3.35373	34.988	35.4764
3.37289	36.484	34.821
3.39206	37.996	34.2
3.41122	39.676	33.4632
3.43038	41.671	32.7778
3.44955	43.54	32.0788
3.46871	45.605	31.178
3.48788	47.817	29.895
3.50704	49.8918	28.2742
3.52621	51.758	26.475
3.54537	53.606	24.8852
3.56453	55.678	23.3484
3.5837	57.7528	22.2868
3.60286	59.3038	21.54
3.62203	60.6672	20.9928
3.64119	61.5779	20.5542
3.66035	62.1398	20.1534
3.67952	62.2542	19.7566
3.69868	61.5362	19.2966
3.71785	59.7389	18.4374
3.73701	56.2054	17.1116
3.75618	51.7002	15.4384
3.77534	47.25	13.5988
3.7945	42.7909	11.8714
3.81367	39.124	10.5658
3.83283	36.043	9.6944
3.852	33.3024	9.3268
3.87116	30.576	9.3314
3.89032	27.636	9.92
3.90949	24.696	10.686
3.92865	21.917	11.4502
3.94782	19.5522	12.0492
3.96698	17.6062	12.2192
3.98615	16.079	11.9292
4.00531	14.959	11.2484
4.02447	13.8621	10.4108
4.04364	13.118	9.607
4.0628	12.362	8.9964
4.08197	11.3305	8.3882
4.10113	10.5271	8.0688
4.12029	9.6881	7.7482
4.13946	9.079	7.323
4.15862	8.687	7.0138
4.17779	8.3254	6.6004
4.19695	7.938	6.1906
4.21611	7.882	6.092
4.23528	8.176	5.9378
4.25444	8.239	5.9976
4.27361	8.173	6.0904
4.29277	8.3624	6.282
4.31194	8.799	6.6466
4.3311	9.3254	7.099
4.35026	9.9604	7.81
4.36943	10.7003	8.426
4.38859	10.8485	9.0418
4.40776	10.738	9.3248
4.42692	10.738	9.4718
4.44608	10.5199	9.2978
4.46525	10.325	8.9924
4.48441	10.325	8.8098
4.50358	10.276	8.7684
4.52274	9.912	8.892

## Sheet: Figure S4G
Figure 4-figure supplement 1G. ATGL-1::GFP expression under PPP knockdown.
luci	T25B9.9i	tkt-1i
0.91	8.41	13.59
0.87	21.23	16.425
0.71	18.59	9.649
2.05	14.32	12.865
2.59	8.2	6.6
2.18	16.85	13.695
3.74	10.39	8.075
2.56	17.72	13.105
3.64	7.3	9.233
3.4	19.8	15.45
3.49	15.85	9.847
3.93	16.33	24.54
5.08	21.01	12.146
5.43	30.69	12.997
5.14	13.5	17.774
5.67	15.15	15.009
4.53	24.14	27.947
5.44	28.8	22.79
5.69	26.05	27.648
6.96	17.77	14.206
8.78	23.9	24.211
6.14	24.15	16.318
6.64	15.7	15.392
7.05	22.69	24.544
7.56	18.92	15.227
6.41	18.52	13.322
7.24		14.69
5.67		19.331
4.76
5.54
4.55
3.66
3.09
0

## Sheet: Figure S4H
Figure 4-figure supplement 1H. PLIN-1::mCherry intensity under tkt-1 and hxk-2 knockdown.
luci	hxk-2i luci	tkt-1i luci	hxk-2i tkt-1i
26.83	12.92	8.41	8.615
11.97	10.35	9.76	8.807
31.14	7.47	7.92	4.73
15.7	9.48	15.46	3.647
17.32	12.26	11.94	5.101
24.26	16.8	10.57	7.783
19	24.45	13.8	11.638
12.43	13.69	11.04	3.402
14.32	22.58	16.64	8.772
7.55	16.72	16.89	6.918
17.45	13.72	13.88	12.249
16.823	15.64	16.638	15.482
30.545	14.27	19.442	5.539
19.828	12.14	10.953	4.742
22.291	14.8	8.802	9.927
5.916	16.82	16.527
	14.87	17.258

## Sheet: Figure S4I
Figure 4-figure supplement 1I. LD diameter (PLIN-1::mCherry) under hxk-1 and acs-2 double knockdown.
luci	hxk-1i; luci	acs-2i; luci	hxk-1i; acs-2i
1.151	0.949	2.353	2.625
0.596	0.778	1.403	2.625
1.838	1.192	0.495	2.625
1.141	1.383	2.353	2.625
1.343	1.06	1.151	2.625
0.535	0.576	0.505	2.625
0.606	1.454	1.464	2.625
0.858	0.424	1.03	2.615
1.646	2.1	0.899	2.615
1.888	0.788	0.464	2.615
2.11	0.979	1.676	2.615
2.292	0.505	1.151	2.615
0.424	0.454	2.363	2.615
1.636	0.495	0.515	2.615
0.979	1.151	1.111	2.605
0.757	0.788	0.535	2.605
1.03	1.212	0.757	2.605
0.798	0.565	0.687	2.605
0.353	0.535	1.07	2.595
0.697	0.465	1.121	2.595
2.02	0.656	0.959	2.595
0.909	0.687	0.727	2.595
0.767	0.586	1.515	2.595
1.767	1.05	0.576	2.585
0.515	0.555	0.464	2.575
0.515	1.212	0.495	2.575
0.919	1.03	1.181	2.575
1.525	0.666	0.707	2.565
1.626	0.434	1	2.565
1.03	0.636	2.151	2.565
1.727	0.374	0.464	2.565
1.222	0.646	0.687	2.565
0.454	0.505	0.576	2.565
2.03	0.535	1.04	2.565
1.151	0.454	1.09	2.555
2.201	1.262	1.444	2.555
1.404	0.505	1.454	2.555
1.161	0.596	0.949	2.555
0.757	1.05	0.767	2.555
0.848	1.01	0.717	2.555
1.434	0.666	0.666	2.555
0.545	1.353	0.757	2.545
1.686	1.505	1.545	2.545
1.979	0.666	0.535	2.545
1.959	1.656	0.576	2.545
0.929	1.111	0.495	2.545
2.009	1.03	2.353	2.545
1.383	0.525	1.817	2.544
1.03	1.333	0.949	2.544
1.727	0.727	0.505	2.544
0.767	1.313	0.515	2.535
2.363	0.555	0.969	2.535
1.363	1.06	2.353	2.535
2.211	1.888	0.363	2.534
0.394	0.919	1.06	2.524
2.535	1.999	1.515	2.524
1.888	0.404	1.03	2.524
0.586	0.465	1.898	2.524
1.323	0.465	0.959	2.514
0.394	0.848	0.878	2.514
0.535	0.384	0.616	2.514
1.282	1.787	0.707	2.514
0.404	0.899	0.858	2.514
1.06	2.444	1	2.514
1.737	2.04	0.616	2.504
0.808	1.06	0.525	2.504
0.666	0.757	1.868	2.504
1.313	1.404	0.464	2.504
0.374	2.514	1.656	2.504
0.555	0.565	1.323	2.504
1.313	0.535	0.979	2.504
1.222	1.939	0.949	2.494
0.798	1.878	2.171	2.494
1.777	0.677	0.929	2.494
1.424	0.505	1.06	2.494
1.141	1.494	1.121	2.494
0.545	1.383	0.959	2.484
0.959	1.646	1.262	2.484
1.262	0.929	0.495	2.474
2.161	0.535	2.332	2.474
0.909	2.09	2.393	2.474
1.121	1.02	0.576	2.464
1.595	0.384	0.444	2.464
0.636	0.969	2.353	2.464
1.666	0.364	1.595	2.464
1.111	1.03	0.919	2.464
1.929	0.545	0.878	2.464
1.444	0.818	1.686	2.464
1.424	1.111	1.504	2.464
0.424	0.404	2.353	2.454
1.828	0.778	0.757	2.454
2.383	0.879	1.828	2.454
1.293	0.778	1.353	2.444
1.222	0.495	1.555	2.444
0.364	0.394	2.242	2.444
0.677	0.838	1.212	2.444
0.919	0.414	0.899	2.443
0.576	0.616	2.201	2.434
0.535	1.04	0.767	2.434
0.879	1.202	0.576	2.434
2.434	0.778	0.969	2.434
0.576	0.394	0.767	2.433
2.575	1.555	1.545	2.423
1.474	0.979	1.151	2.423
1.394	1.585	0.747	2.423
1.05	0.606	0.616	2.423
1.252	0.565	0.798	2.413
0.646	0.828	0.515	2.413
0.747	0.505	0.979	2.413
0.828	0.606	0.687	2.413
1.979	0.828	1.181	2.413
0.636	0.646	0.878	2.413
0.919	0.656	1.919	2.403
0.535	1.424	1.232	2.403
0.727	1.05	0.666	2.403
1.272	0.424	0.798	2.403
0.808	0.424	1.797	2.403
1.383	0.818	0.363	2.403
1.091	2.514	0.949	2.393
0.444	0.525	1.272	2.393
0.697	0.364	0.363	2.393
1.363	0.949	1.03	2.393
0.596	1.232	2.06	2.393
0.565	0.828	1.303	2.393
0.747	0.737	1.02	2.393
2.05	0.767	1.474	2.383
1.03	0.424	0.767	2.383
0.808	0.677	1.252	2.383
2.262	0.666	1.303	2.383
1.141	1.091	1.202	2.383
0.545	1.303	1.171	2.383
1.303	1.323	0.515	2.383
0.838	0.858	2.12	2.383
1.192	0.879	1.111	2.373
0.465	0.818	0.838	2.373
0.485	0.767	2.222	2.373
0.596	0.757	1.05	2.363
1.161	0.99	1.171	2.363
0.687	0.959	1.252	2.363
0.454	0.525	1.252	2.363
0.525	1.828	1.919	2.363
0.707	0.374	1.474	2.363
1.161	1.313	0.576	2.363
0.656	1.333	1.05	2.353
0.545	0.424	0.858	2.353
0.576	0.424	1.282	2.353
0.394	1.222	0.535	2.353
1.494	1.394	2.353	2.343
0.848	0.485	0.757	2.343
0.687	0.374	0.616	2.343
0.778	0.374	0.495	2.343
0.616	0.485	1.202	2.343
1.333	0.879	0.707	2.343
0.727	0.545	1.141	2.343
0.737	0.515	1.02	2.343
2.181	0.606	1.151	2.343
0.778	0.656	0.939	2.343
1.474	0.798	1.525	2.333
0.788	2.131	0.727	2.333
0.939	0.747	0.576	2.333
0.555	0.424	1.363	2.332
2.05	1.525	1.07	2.332
1.181	0.364	1.262	2.323
0.636	0.949	1.525	2.323
0.969	0.919	0.363	2.323
1.141	1.777	1.373	2.323
0.636	1.262	0.899	2.323
0.404	2.302	1.919	2.323
2.05	0.808	0.858	2.323
1.101	1.08	0.363	2.323
0.949	1.515	1.363	2.322
0.808	0.899	1.06	2.322
1.293	0.757	1.797	2.322
1.343	0.525	0.525	2.312
2.504	0.545	0.959	2.312
2.191	0.778	0.505	2.312
0.454	0.909	0.515	2.312
2.11	0.616	1.05	2.312
0.495	1.262	0.616	2.302
1.282	0.394	1.545	2.302
1.222	1.01	1.515	2.302
0.666	0.424	1.797	2.302
0.889	1.232	1.01	2.302
1.323	1.828	1.696	2.302
1.232	0.747	1.01	2.302
0.636	1.808	1.363	2.302
0.757	0.767	0.858	2.302
0.364	0.424	1.161	2.292
0.677	1.434	0.576	2.292
1.868	1.545	0.979	2.292
1.101	0.99	1.171	2.292
1.434	1.575	0.969	2.292
0.959	1.03	1.07	2.292
1.323	0.959	1	2.292
1.383	0.353	2.353	2.282
1.07	0.424	1.363	2.282
0.687	1.202	2.262	2.282
1.252	1.02	0.777	2.282
0.565	0.424	1.494	2.282
0.353	0.636	1.807	2.282
0.424	0.505	1.535	2.282
0.364	1.293	1.454	2.272
1.757	0.353	1.474	2.272
1.828	1.161	0.525	2.272
1.454	0.525	2.332	2.272
0.374	0.414	1.111	2.272
1.03	0.555	1.383	2.272
1.747	0.444	1.141	2.272
0.808	0.656	1.313	2.272
0.808	0.596	1.07	2.272
0.475	0.596	0.939	2.262
2.242	1.181	2.353	2.262
0.889	0.384	0.959	2.262
1.08	0.444	1.525	2.262
0.525	1.06	1.626	2.262
0.949	0.353	2.504	2.262
1.03	0.404	1.262	2.262
0.767	0.606	1.747	2.262
0.919	2.242	0.727	2.262
0.576	0.788	1.787	2.262
0.444	0.444	1.333	2.262
0.424	0.979	1.444	2.262
0.808	2.323	2.009	2.262
1.212	0.353	0.505	2.252
0.525	0.586	2.04	2.252
1.737	1.192	1.151	2.252
1.262	0.858	1.939	2.252
0.394	1	2.484	2.252
0.969	0.969	0.979	2.252
1.535	0.444	2.403	2.252
2.171	0.788	1.05	2.242
1.494	0.424	0.979	2.242
0.525	0.596	0.969	2.242
1.03	0.838	0.525	2.242
1.949	1.282	0.747	2.242
0.596	1.454	2.242	2.242
0.444	0.626	0.798	2.242
1.222	0.727	0.989	2.242
0.606	0.818	0.707	2.242
0.818	2.02	1.02	2.242
1.868	0.677	1.403	2.242
1.909	0.414	0.525	2.242
0.434	0.495	1.858	2.242
0.555	0.475	2.201	2.242
0.596	0.808	2.484	2.232
1.141	0.353	0.444	2.232
1.101	1.444	1.949	2.232
0.545	0.454	0.707	2.232
1.545	1.161	1.464	2.232
2.06	0.949	0.505	2.232
1.03	1.171	1.05	2.232
1.545	1.05	1.434	2.232
0.414	1.192	1.303	2.232
0.545	0.666	1.191	2.232
0.979	0.909	1.383	2.232
2.232	1	1.141	2.232
0.353	0.374	1.444	2.231
1.737	1.525	1.181	2.222
0.798	0.384	1.575	2.222
0.757	0.868	1.949	2.201
0.868	1.01	1.696	2.201
0.727	0.465	1.02	2.201
1.222	2.252	1.676	2.201
0.384	0.576	0.464	2.201
0.687	0.868	0.798	2.201
0.475	0.909	2.09	2.191
1.03	1.161	1.454	2.191
0.565	1.212	0.929	2.191
0.364	0.444	1.343	2.191
0.848	0.868	2.04	2.191
0.656	0.969	1.161	2.191
0.656	1.464	1.716	2.191
0.646	0.687	0.535	2.191
0.545	0.919	1.696	2.191
1.171	0.404	1.959	2.191
1.222	1.616	0.767	2.181
0.858	0.747	1.757	2.181
0.565	0.424	0.767	2.181
0.374	1.192	1.01	2.181
1.03	0.666	1.04	2.181
0.515	0.616	2.009	2.181
0.646	1.252	1.131	2.181
1.08	0.485	2.222	2.181
0.727	1.555	0.353	2.181
1.787	1.424	1.939	2.171
1.293	0.99	1.403	2.171
0.404	1.151	1.01	2.171
1.202	0.808	1.848	2.171
1.101	1.222	0.353	2.171
2.05	0.616	1.939	2.171
0.747	1.03	1.939	2.171
0.737	0.545	0.838	2.171
0.949	0.565	0.949	2.171
0.606	1.192	1.111	2.171
0.374	1.272	0.353	2.161
0.596	0.879	1.191	2.161
0.353	0.485	0.929	2.161
0.404	1.636	1.939	2.161
2.494	0.949	0.444	2.161
0.99	1.262	0.697	2.161
0.515	0.838	0.838	2.161
0.384	1.535	0.525	2.161
0.677	0.515	0.666	2.161
1.717	0.899	0.363	2.161
0.959	1.949	1.959	2.151
1.181	0.636	0.353	2.151
0.656	0.475	1.08	2.151
1.333	1.323	0.989	2.151
0.485	0.434	1.929	2.151
0.485	0.838	0.747	2.141
0.737	0.939	0.363	2.141
2.1	0.545	1.919	2.141
0.475	1.717	2.222	2.141
1.434	0.555	0.989	2.141
0.454	0.687	0.353	2.141
0.757	1.606	1.525	2.141
1.383	0.919	0.353	2.141
0.485	0.909	1.04	2.141
1.01	2.625	0.666	2.131
1.444	2.504	1.888	2.131
0.404	0.515	0.747	2.131
1.646	0.364	1.06	2.131
0.606	0.364	1.08	2.131
0.565	2.353	1.403	2.131
0.727	0.717	0.363	2.13
0.899	0.899	1.918	2.13
1.404	0.767	0.929	2.13
0.475	0.465	0.838	2.13
0.424	0.576	1.464	2.13
0.505	0.485	1.706	2.121
1.656	0.929	1.171	2.121
1.252	2.636	1.353	2.121
1.979	0.565	1.161	2.121
0.939	0.808	1.02	2.121
0.545	0.636	0.989	2.121
1.565	1.04	1.282	2.121
2.06	0.384	0.899	2.12
0.586	0.727	0.535	2.12
1.141	0.788	0.444	2.12
1.111	1.313	0.858	2.11
0.485	2.05	1.636	2.11
1.545	1.242	0.989	2.11
0.818	0.374	1.03	2.11
1.636	0.798	2.06	2.11
0.697	0.465	1.181	2.11
1.989	1.969	0.444	2.11
1.101	0.666	2.04	2.11
0.879	1.434	1.313	2.1
1.323	1.848	0.979	2.1
2.373	0.939	1.313	2.1
0.465	1.838	1.171	2.1
0.929	2.575	1.06	2.1
0.515	1.606	1.939	2.1
1.545	1.394	1.05	2.1
0.596	0.616	0.767	2.1
1.293	1.101	0.697	2.1
0.727	2.444	0.697	2.1
1.686	0.677	1.727	2.1
0.384	1.666	1.303	2.09
1.202	0.889	1.08	2.09
0.374	1.414	0.717	2.09
0.919	0.454	1.303	2.09
1.141	2.04	0.959	2.09
0.636	0.384	0.515	2.09
0.848	0.666	0.535	2.09
0.515	1.333	1.202	2.09
0.606	1.171	0.464	2.09
1.343	0.909	0.363	2.09
2.413	0.465	1.212	2.09
1.777	0.475	1.212	2.08
2.1	0.576	1.04	2.08
2.595	1.07	0.535	2.08
1.141	0.626	0.363	2.08
0.596	0.959	1.939	2.08
0.848	0.979	1.616	2.08
0.656	0.798	0.838	2.08
1.222	2.06	1.494	2.08
0.606	1.464	1.747	2.08
0.828	1.303	1.454	2.07
0.495	2.524	1.01	2.07
0.969	0.747	1.08	2.07
0.616	0.646	0.495	2.07
0.788	1.01	1.171	2.07
0.606	0.434	0.727	2.07
0.555	0.979	1.343	2.07
0.384	1.101	0.777	2.07
1.515	1.07	0.979	2.07
1.767	1.262	1.181	2.07
0.747	0.485	0.757	2.07
0.929	1.01	1.171	2.07
0.848	0.505	0.767	2.07
0.717	1.484	2.222	2.07
1.404	1.606	0.444	2.07
1.959	0.778	1.525	2.07
0.767	1	1.939	2.06
1.202	0.889	0.717	2.06
1.131	0.465	1.272	2.06
0.414	1.02	1.464	2.06
1.091	0.414	1.656	2.06
0.727	1.04	1.444	2.06
0.545	0.384	0.878	2.06
0.959	0.646	1.303	2.06
1.212	0.818	1.868	2.06
0.969	1.656	2.222	2.06
0.818	0.475	0.464	2.06
0.424	0.788	0.353	2.06
0.919	0.565	2.242	2.06
1.07	0.374	0.979	2.06
1.202	0.858	1.202	2.05
0.465	1.111	1.202	2.05
2.595	0.889	2.242	2.05
0.687	0.565	0.666	2.05
2.03	0.727	1.474	2.05
0.646	1.151	0.747	2.05
1.192	1.919	1.01	2.05
0.364	1.293	0.666	2.05
1.171	1.505	1.02	2.05
1.171	1.303	1.04	2.05
0.414	0.636	1.06	2.05
0.555	2.141	1.403	2.04
1.353	1.606	1.292	2.04
1.101	1.747	1.05	2.04
0.374	0.606	0.576	2.04
0.677	1.242	1.262	2.04
0.565	1.909	1.686	2.04
0.444	1.888	1.111	2.04
0.868	1.121	1.333	2.04
2.656	2.05	0.727	2.04
0.666	1.04	1.716	2.04
1.242	1.303	1.363	2.03
0.778	0.626	0.878	2.03
0.767	1.05	1.131	2.03
0.909	1.434	1.07	2.03
0.747	1.101	0.949	2.03
1.666	1.252	1.393	2.03
0.424	0.525	1.878	2.03
0.364	0.444	1.403	2.029
2.11	0.747	1.09	2.029
0.747	1.929	1.121	2.029
1.212	0.939	1.626	2.02
1.303	0.879	1.817	2.02
1.717	1.424	1.797	2.02
0.687	1.151	0.949	2.02
0.848	1.808	1.939	2.02
1.757	1.05	0.666	2.02
0.384	0.747	2.322	2.019
0.727	1.616	0.515	2.019
0.586	0.495	1.252	2.019
2.514	1.686	2.403	2.019
0.616	1.686	2.222	2.019
0.545	0.353	0.363	2.009
0.697	0.505	0.353	2.009
1.707	1.747	1.969	2.009
1.232	0.778	1.212	2.009
1.767	2.242	1.292	2.009
1.474	1.757	0.979	2.009
0.727	1.474	1.706	2.009
0.535	1.404	0.495	2.009
1.787	1.262	0.798	2.009
1.303	1.121	0.505	2.009
0.959	1.141	0.727	2.009
1.646	2.181	1.04	2.009
0.909	0.757	2.11	1.999
1.303	2.444	0.777	1.999
0.717	2.08	1.929	1.999
0.656	1.111	0.515	1.999
1.575	1.202	0.747	1.999
2.11	1.01	0.464	1.999
0.858	0.374	1.141	1.999
1.131	0.475	0.495	1.999
0.485	0.687	1.605	1.999
0.949	0.515	0.505	1.999
0.485	1.293	0.444	1.999
1.686	1.131	1.171	1.999
1.545	0.969	2.08	1.999
1.373	0.374	0.576	1.999
0.788	1.141	1.616	1.999
0.979	1.626	0.616	1.999
0.848	1.181	1.605	1.999
0.828	0.939	0.878	1.999
1.06	0.424	2.04	1.999
1.595	1.08	1.716	1.989
0.646	0.757	2.09	1.989
1.494	0.596	1.817	1.989
0.465	0.384	0.495	1.989
0.747	1.383	0.767	1.989
0.919	0.475	1.535	1.989
1.505	0.697	1.121	1.989
0.969	0.384	1.424	1.989
1.091	0.656	1.575	1.989
0.495	0.495	0.515	1.989
1.323	0.757	1.908	1.989
1.293	1.282	0.525	1.989
0.515	0.636	0.899	1.989
1.444	1.434	0.767	1.989
0.656	0.717	0.616	1.989
0.737	0.697	1.212	1.989
1.919	1.091	0.525	1.989
1.797	0.626	0.505	1.989
0.959	0.778	1.393	1.979
1.07	0.909	1.414	1.979
1.747	1.909	2.242	1.979
2.009	0.848	0.979	1.979
1.212	0.949	2.171	1.979
1.898	2.232	1.888	1.979
1.808	1.383	1.02	1.979
0.697	0.606	1.111	1.979
2.272	0.656	1.202	1.979
2.595	0.747	1.535	1.979
2.373	0.737	2.029	1.979
0.707	0.848	0.979	1.979
1.08	1.767	1.656	1.969
1.555	1.293	1.303	1.969
0.687	0.465	0.757	1.969
1.575	1.232	1.262	1.969
0.666	1.525	1.605	1.969
1.777	1.161	1.313	1.969
0.384	0.687	1.757	1.969
0.778	1.747	0.959	1.969
0.808	0.788	1.313	1.969
0.535	0.364	0.505	1.969
1.07	1.565	1.151	1.969
1.131	0.485	1.151	1.969
0.515	1.101	1.363	1.969
1.767	0.717	0.535	1.969
0.919	0.697	1.535	1.959
0.899	0.414	1.393	1.959
1.727	0.858	0.363	1.959
0.687	0.848	0.717	1.959
0.707	0.374	0.697	1.959
0.636	0.778	1.474	1.959
0.555	0.848	1.191	1.959
0.949	1.878	2.342	1.959
0.788	0.808	0.899	1.959
0.384	0.485	0.757	1.959
0.929	1.232	2.07	1.959
0.677	0.495	0.899	1.959
0.778	0.374	1.919	1.959
1.707	0.899	1.323	1.959
2.343	0.555	1.959	1.959
0.384	0.475	1.878	1.959
1.212	1.787	1.05	1.949
1.222	1.383	0.363	1.949
1.091	0.626	1.292	1.949
0.889	0.576	1.181	1.949
0.949	0.656	1.585	1.949
0.899	0.929	1.02	1.949
1.171	0.767	0.535	1.949
1.595	0.666	0.969	1.949
0.565	0.485	0.535	1.949
2.141	0.434	2.353	1.949
2.201	0.364	1.141	1.949
0.697	0.586	1.282	1.949
1.222	0.646	0.697	1.949
1.474	0.444	1.191	1.939
1.07	0.576	1.757	1.939
1.363	0.485	0.495	1.939
0.979	0.949	1.333	1.939
1.686	1.343	1.494	1.939
1.303	0.384	1.02	1.939
1.383	0.687	1.565	1.939
0.757	0.586	0.464	1.939
0.353	0.374	1.585	1.939
0.868	0.656	1.595	1.929
1.848	0.697	0.777	1.929
0.889	0.394	1.848	1.929
0.384	0.979	1.434	1.929
1.222	0.364	1.01	1.929
1.07	0.525	1.494	1.929
0.636	0.959	2.242	1.929
0.848	0.485	1.717	1.929
1.01	0.636	1.05	1.929
1.252	0.767	1.716	1.929
1.515	0.979	0.505	1.929
2.009	0.414	2.272	1.929
0.828	0.505	0.858	1.929
2.666	0.929	0.899	1.929
0.666	1.303	0.464	1.929
0.939	1.111	0.525	1.929
1.07	1.303	2.322	1.919
0.565	0.838	1.191	1.919
1.141	0.979	2.04	1.919
0.798	0.838	1.504	1.919
1.676	0.646	2.363	1.919
1.585	0.535	0.505	1.919
1.989	0.444	0.727	1.919
0.414	0.636	0.959	1.919
1.151	0.949	0.727	1.919
1.262	0.454	1.535	1.919
1.383	1.161	0.464	1.919
0.596	0.717	0.858	1.919
2.04	0.848	1.333	1.919
1.363	0.434	0.989	1.918
0.868	0.899	0.949	1.918
1.434	0.576	1.111	1.918
2.009	0.697	1.04	1.909
0.757	0.374	1.434	1.909
1.262	1.202	1.747	1.909
1.07	0.666	2.161	1.909
1.05	1.272	1.403	1.909
1.262	0.404	1.444	1.909
0.889	1.343	1.252	1.909
1.02	0.515	1.202	1.909
0.808	0.808	0.616	1.909
1.696	0.656	1.272	1.909
0.677	0.737	1.151	1.909
0.515	0.384	1.292	1.909
1.212	0.646	0.697	1.908
1.313	1.444	1.363	1.908
0.465	0.565	1.515	1.908
0.969	0.737	0.798	1.908
1.06	0.767	0.757	1.898
0.858	0.687	0.576	1.898
0.475	0.717	1.908	1.898
0.959	0.414	1.181	1.898
1.212	0.364	0.939	1.898
0.889	0.707	0.969	1.898
0.353	1.101	1.02	1.898
0.515	0.858	1.717	1.898
0.565	1.091	1.595	1.898
1.373	1.242	1.484	1.898
1.04	1.02	0.747	1.898
0.465	1.394	1.666	1.898
0.717	1.394	0.747	1.898
0.374	1.797	1.403	1.898
0.394	0.747	1.171	1.888
0.656	0.808	2.222	1.888
0.374	1.161	0.616	1.888
0.364	0.899	1.232	1.888
0.909	0.879	1.383	1.888
1.04	1.525	1.252	1.888
1.969	0.535	1.131	1.888
1.07	0.535	0.757	1.888
1.192	1.444	1.676	1.888
0.596	0.353	0.858	1.878
0.475	0.899	0.757	1.878
0.899	1.141	1.363	1.878
0.465	1.727	1.05	1.878
0.565	0.414	2.222	1.878
0.424	0.414	1.616	1.878
1.131	1.323	2.292	1.878
0.535	0.939	1.181	1.878
0.939	1.05	1.212	1.878
1.282	1.363	1.171	1.878
1.585	1.525	1.717	1.878
0.636	1.02	1.999	1.878
0.475	0.778	1.303	1.878
0.788	0.737	1.898	1.878
0.505	0.949	0.929	1.878
0.485	0.515	1.939	1.878
0.364	0.626	1.04	1.868
2.605	0.899	1.121	1.868
1.333	1.04	1.06	1.868
0.353	0.505	2.13	1.868
0.586	0.697	0.949	1.868
1.202	0.586	0.878	1.868
0.465	0.677	1.616	1.868
2.02	0.374	1.101	1.868
0.606	0.808	0.949	1.868
0.666	1.181	1.101	1.868
1.838	0.586	1.383	1.868
1.192	1.141	0.939	1.868
0.606	1.03	2.443	1.868
1.525	1.363	0.545	1.868
0.475	0.384	2.332	1.868
1.545	1.131	1.212	1.868
0.364	1.686	0.697	1.868
1.434	0.465	0.767	1.868
0.828	0.535	1.595	1.868
0.515	1.282	0.929	1.868
1.373	0.505	1.353	1.868
0.879	1.727	0.989	1.868
1.192	1.939	0.757	1.868
0.454	0.949	1.111	1.858
0.828	0.959	0.858	1.858
0.868	1.282	1.929	1.858
0.899	0.879	1.898	1.858
1.666	0.525	1.121	1.858
0.465	0.394	1.817	1.858
0.959	1.787	0.878	1.858
0.99	0.707	0.505	1.858
1.131	0.727	1	1.858
0.868	1.313	1.232	1.858
0.767	1.717	1.646	1.848
0.707	1.202	0.767	1.848
2.1	0.747	1.101	1.848
1.192	1.323	0.576	1.848
0.545	0.505	0.505	1.848
0.525	1.222	0.464	1.848
2.423	0.798	0.697	1.848
0.444	0.505	1.323	1.848
1.313	0.697	0.979	1.848
1.333	1.293	1.01	1.848
1.181	0.677	0.949	1.848
2.434	1.424	1.727	1.848
0.788	1.08	0.878	1.848
1.272	1.373	1.919	1.848
2.282	0.495	1.06	1.848
1.464	1.696	1.101	1.848
0.707	1.07	1.464	1.848
0.535	1.171	1.08	1.848
1.646	1.232	0.505	1.848
0.646	0.626	1.191	1.848
1.333	0.677	1.434	1.838
1.707	0.465	0.949	1.838
1.293	1.939	1.131	1.838
1.575	0.697	2.292	1.838
0.99	0.848	0.798	1.838
1.909	0.475	1.807	1.838
0.616	0.424	0.464	1.838
0.485	0.959	2.009	1.838
1.343	1.171	0.495	1.838
0.596	1.696	2.504	1.838
2.11	0.626	0.616	1.838
1.202	0.737	1.07	1.838
1.06	0.747	0.525	1.838
1.474	0.434	1.696	1.838
0.788	2.272	0.505	1.828
2.141	0.919	1.222	1.828
1.293	0.353	1.777	1.828
0.909	0.394	1.202	1.828
2.232	0.707	2.231	1.828
1.151	0.909	0.878	1.828
2.141	0.798	0.798	1.828
0.798	2.211	1.171	1.828
2.312	0.565	0.959	1.828
1.767	1.575	1.111	1.828
1.919	0.828	1.525	1.828
0.889	0.364	0.697	1.828
1.999	1.454	0.777	1.828
2.605	0.606	1.585	1.828
1.323	1.333	0.495	1.818
0.899	1.373	1.151	1.818
0.656	1.161	0.727	1.818
0.535	0.364	0.525	1.818
2.323	0.485	1.484	1.818
0.424	0.727	0.525	1.818
1.141	1.969	0.767	1.818
1.131	0.788	1.343	1.818
1.111	0.404	2.141	1.818
1.262	0.687	0.576	1.818
0.858	1.242	1.908	1.818
2.282	0.374	0.777	1.818
1.464	1.171	0.798	1.818
1.444	0.606	0.969	1.817
0.838	1.686	1.999	1.817
0.959	0.424	1.666	1.808
1.293	1.05	0.697	1.808
1.091	0.535	1.272	1.808
0.454	0.626	1.646	1.808
1.282	0.475	1.02	1.808
0.586	1.424	1.717	1.808
0.798	0.444	1.797	1.808
0.99	1.181	0.949	1.808
0.767	0.788	2.009	1.808
2.413	1.555	1.787	1.808
0.959	0.475	0.929	1.808
0.677	1.363	1.434	1.807
0.808	1.262	0.353	1.807
2.423	0.727	2.312	1.807
1.303	1.111	1.838	1.807
1.585	1.484	0.989	1.797
0.545	0.475	1.555	1.797
1.212	2.585	0.444	1.797
1.767	0.404	0.444	1.797
1.797	1.484	0.747	1.797
0.414	0.808	1.303	1.797
2.333	0.444	1.141	1.797
0.808	0.454	0.727	1.797
0.798	0.687	1.717	1.797
1.696	2.545	1.353	1.797
0.565	0.515	0.495	1.797
2.393	0.545	1.252	1.797
0.364	0.505	1.131	1.797
0.576	0.717	2.151	1.787
1.505	1.454	1.272	1.787
2.514	0.414	1.101	1.787
1.626	2.423	1.383	1.787
2.161	0.636	0.989	1.787
0.475	1	2.009	1.787
0.747	0.879	1.868	1.787
0.959	1.222	1.969	1.787
0.939	0.545	1.727	1.787
0.606	0.465	0.727	1.787
2.302	1.282	1.918	1.787
2.181	0.424	1.212	1.787
1.747	0.414	0.767	1.777
0.929	1.919	1.646	1.777
1.373	0.707	0.939	1.777
0.99	0.394	2.312	1.777
1.999	1.262	0.444	1.777
1.565	2.09	1.151	1.777
0.616	2.161	0.545	1.777
1.404	0.414	1.08	1.777
1.303	1.848	1.171	1.777
1.091	2.625	0.858	1.777
2.282	1.08	2.383	1.777
2.302	1.656	0.444	1.777
1.08	1.05	1	1.767
0.666	1.252	1.656	1.767
0.515	2.009	1.898	1.767
1.313	0.535	1.232	1.767
1.868	0.505	2.171	1.767
0.353	1.474	1	1.767
1.202	0.687	0.576	1.767
1.666	0.707	0.353	1.767
1.07	0.525	0.969	1.767
1.999	0.565	1.605	1.767
1.202	2.191	0.949	1.767
0.889	0.353	0.464	1.767
2.03	0.666	0.777	1.767
0.747	1.878	1.545	1.767
0.565	0.465	0.525	1.767
2.272	1.919	1.252	1.767
1.07	1.444	1.545	1.767
0.737	1.606	0.949	1.767
0.535	0.364	1.484	1.767
0.545	0.767	2.474	1.767
1.323	1.03	1.212	1.767
1.373	0.949	0.747	1.767
1.676	1.121	1.434	1.767
1.353	0.374	1.01	1.767
0.485	0.879	1.121	1.767
1.525	0.374	2.161	1.757
2.393	1.424	0.969	1.757
1.192	1.242	1.212	1.757
0.788	0.899	1.787	1.757
2.161	0.656	1.191	1.757
1.101	0.949	1.171	1.757
2.05	0.747	0.464	1.757
0.788	1.505	1.787	1.757
0.535	1.848	2.383	1.757
0.808	0.414	1.141	1.757
1.888	1.888	2.151	1.757
0.374	1.848	1.101	1.757
0.848	0.656	1.09	1.757
0.454	0.384	1.232	1.757
0.909	1	1.181	1.757
0.949	0.656	1.353	1.757
0.666	1.02	1.202	1.757
1.08	0.606	1.949	1.757
1.616	1.343	1.343	1.757
2.201	0.959	1.161	1.747
1.262	0.889	0.969	1.747
0.444	0.576	1.313	1.747
0.99	0.535	0.525	1.747
0.848	0.404	0.515	1.747
0.555	0.596	1.484	1.747
1.06	0.687	1.838	1.747
0.737	0.353	1.373	1.747
2.232	0.767	1.292	1.747
1.262	1.121	1.333	1.747
0.434	1.05	1.292	1.747
0.798	0.404	1.716	1.747
0.444	0.929	1.01	1.747
0.717	0.454	1.01	1.747
0.767	1.394	0.939	1.737
0.505	1.111	2.242	1.737
2.03	0.505	2.342	1.737
0.889	0.848	0.444	1.737
1.131	1.181	0.989	1.737
0.717	1.03	1.727	1.737
1.353	0.475	1.232	1.737
1.424	1.262	1.01	1.737
1.111	1.141	1.515	1.737
0.545	1.383	1.09	1.737
0.666	0.646	1.424	1.737
1.303	0.939	0.929	1.727
0.404	0.454	1.07	1.727
1.454	0.868	1.222	1.727
1.585	1.091	1.212	1.727
1.747	0.485	0.929	1.727
1.252	1.545	1.333	1.727
0.838	1.04	0.878	1.727
1.353	2.656	1.121	1.727
0.737	1.161	0.576	1.727
0.969	1.595	1.232	1.727
1.293	0.969	1.252	1.727
0.636	0.636	0.676	1.727
0.424	1.343	1.171	1.727
1.343	0.535	1.828	1.727
0.899	2.272	1.787	1.727
0.747	2.504	1.02	1.717
0.949	0.525	1.02	1.717
1.121	0.414	1.01	1.717
0.616	0.576	1.424	1.717
0.525	0.889	1.696	1.717
1.979	0.384	1.05	1.717
1.515	0.404	0.525	1.717
0.767	0.757	1.575	1.717
1.02	0.545	0.767	1.716
0.979	2.171	0.939	1.716
0.889	2.232	2.332	1.716
1.161	0.757	0.505	1.716
1.08	0.475	0.505	1.716
0.697	2.201	0.747	1.716
1.212	0.909	0.464	1.707
1.303	1.525	0.444	1.707
0.969	0.929	2.292	1.707
1	1.313	0.495	1.707
1.444	1.222	0.969	1.707
0.868	1.252	0.676	1.707
1.575	0.959	0.353	1.707
0.99	1.898	0.798	1.707
1.636	1.646	1.191	1.706
1.535	1.636	1.848	1.706
1.535	0.737	2.252	1.706
1.616	0.798	0.444	1.706
2.656	1.909	0.475	1.706
1.394	0.454	2.13	1.696
0.394	0.374	0.979	1.696
1.07	1.979	1.555	1.696
1.232	0.808	0.545	1.696
1.414	1.828	1.111	1.696
2.201	1.101	1.686	1.696
1.787	0.636	1.959	1.696
2.252	0.454	1.747	1.696
0.979	0.868	1.848	1.696
0.757	0.525	1.111	1.696
0.535	1.394	2.403	1.696
1.03	0.767	1.929	1.696
0.99	0.848	0.939	1.696
1.494	0.707	2.242	1.696
0.979	1.838	1	1.696
1.656	1.03	1.191	1.696
1.272	0.565	1.403	1.696
0.565	0.889	2.252	1.696
1.606	0.475	1.949	1.696
2.464	1.08	0.989	1.686
0.949	0.444	1.06	1.686
0.737	1.131	1.161	1.686
2.605	1.05	0.878	1.686
1.202	0.767	1.605	1.686
1.363	0.576	1.575	1.686
1.717	0.899	0.676	1.686
1.969	1.414	1.313	1.686
1.272	0.364	1.08	1.686
1.626	0.818	0.363	1.686
1.474	0.515	0.444	1.686
0.949	1.01	0.959	1.686
0.495	1.494	1.747	1.686
0.677	0.959	1.484	1.686
1.363	2.252	0.505	1.686
1	0.374	2.151	1.686
2.282	0.555	1.969	1.686
1.212	0.444	2.141	1.686
0.747	0.626	0.353	1.676
0.979	0.959	1.807	1.676
0.767	0.475	1.949	1.676
1.03	1.797	0.576	1.676
2.625	1.656	1.999	1.676
0.414	0.424	0.363	1.676
0.727	0.374	1.454	1.676
0.646	0.525	1.08	1.676
0.555	0.364	2.231	1.676
0.889	0.697	1.605	1.676
0.747	0.535	1.414	1.676
0.717	0.353	0.959	1.676
1.575	0.394	1.141	1.676
0.485	0.969	1.282	1.676
1.192	2.009	0.464	1.676
0.727	0.374	1.171	1.676
1.444	0.444	1.797	1.676
2.373	1.02	0.767	1.676
2.474	0.899	0.515	1.676
1.919	1.181	1.05	1.676
1.151	0.677	1.716	1.676
1.06	0.505	1.444	1.676
2.393	0.505	0.576	1.666
1.293	1.454	2.161	1.666
1.575	0.364	1.282	1.666
1.202	0.475	1.161	1.666
0.858	0.737	0.576	1.666
1.424	0.404	1.717	1.666
2.524	0.364	1.919	1.666
0.767	0.626	1.716	1.666
1.242	2.383	1.646	1.666
1.07	0.666	0.939	1.666
0.364	0.596	1.07	1.666
0.404	1.101	1.989	1.666
0.454	0.565	1.636	1.656
1.797	0.555	1.333	1.656
0.929	0.515	1.212	1.656
1.262	1.464	0.858	1.656
1.838	0.747	1.949	1.656
0.929	1.01	1.02	1.656
0.414	0.778	1.797	1.656
1.747	0.858	1.313	1.656
1.757	0.586	0.767	1.656
1.737	0.364	1.08	1.656
0.737	0.767	1.292	1.656
1.414	0.687	1.03	1.656
0.747	2.141	0.939	1.656
0.353	1.222	1.414	1.656
1.293	1.404	1.393	1.656
1.515	1.727	1	1.656
0.788	0.727	1.01	1.656
1.828	0.465	1.05	1.656
2.323	0.606	1.717	1.646
0.485	0.899	1.202	1.646
0.374	0.677	1.111	1.646
1.373	0.353	1.171	1.646
0.778	0.384	1.919	1.646
1.01	0.424	1.595	1.646
0.747	0.424	0.505	1.646
2.08	1	1.929	1.646
1.282	0.515	0.989	1.646
1.131	1.202	1.08	1.646
0.576	0.586	0.656	1.646
0.434	0.969	1.272	1.646
0.606	1.464	1.929	1.646
1.464	0.515	0.979	1.646
0.788	0.687	1.434	1.646
0.838	0.646	0.606	1.646
1	0.939	1.04	1.646
0.374	0.384	1.06	1.646
0.495	0.656	0.878	1.646
0.404	0.677	1.02	1.646
0.949	1.03	0.767	1.646
0.767	1.595	1.605	1.636
1.02	1.656	1.262	1.636
1.686	0.626	1.252	1.636
1.293	0.889	0.545	1.636
0.858	1.262	2.171	1.636
1.717	0.454	0.394	1.636
0.565	0.414	0.444	1.636
1	1.626	0.505	1.636
0.475	1.343	0.656	1.636
0.808	1.858	0.858	1.636
1.333	0.555	2.322	1.636
1.121	0.828	2.11	1.636
1.131	1.878	2.13	1.636
2.504	1.959	1.747	1.636
0.586	0.677	0.777	1.636
0.737	1.111	1.474	1.636
0.424	0.465	1.101	1.636
0.757	1.323	1.06	1.636
1.515	0.646	1.424	1.636
0.505	0.788	2.05	1.636
0.596	1.05	1.383	1.636
0.818	0.606	1.515	1.636
0.757	1.222	1.716	1.636
0.576	0.959	1.212	1.636
0.555	0.757	1.08	1.636
0.808	1.03	1.252	1.636
0.707	0.495	1.464	1.626
0.434	1.091	1.262	1.626
0.444	0.353	1.929	1.626
0.394	0.626	0.464	1.626
1.939	1.272	0.353	1.626
1.161	1.06	1.262	1.626
0.778	1.414	0.989	1.626
1.07	1.656	0.464	1.626
0.374	0.505	0.495	1.626
1.141	2.545	1.09	1.626
1.383	0.798	0.606	1.626
1.141	0.586	1.222	1.626
2.585	0.485	0.475	1.626
0.848	2.312	0.505	1.626
0.535	0.404	0.444	1.626
1.323	1.192	0.394	1.626
1.252	1.222	0.353	1.626
0.374	0.454	0.495	1.626
1.161	0.687	0.737	1.626
2.211	2.393	0.737	1.626
0.828	1.03	1.727	1.626
1.424	1.636	2.312	1.626
0.767	1.424	1.716	1.626
0.798	0.596	0.394	1.616
1.373	0.858	1.747	1.616
0.394	1.707	0.353	1.616
1.07	0.565	1.888	1.616
1.606	0.555	1.05	1.616
0.616	1.121	2.019	1.616
0.606	0.767	1.353	1.616
1.525	1.262	2.242	1.616
0.687	0.677	1.121	1.616
1.989	0.717	1.06	1.616
0.505	1	1.02	1.616
1.242	1.767	0.727	1.616
0.778	2.615	1.151	1.616
1.07	0.767	1.666	1.616
0.646	2.333	1.09	1.616
1.444	1.05	1.03	1.616
0.636	1.07	2.191	1.616
1.05	1.222	1.656	1.616
1.909	2.03	1.979	1.616
0.747	1.505	1.575	1.616
1	1.272	1.343	1.616
0.828	1.949	0.858	1.606
0.99	1.272	0.505	1.606
2.03	0.565	2.13	1.606
0.818	1.181	0.394	1.606
2.06	0.929	2.201	1.605
1.404	0.99	0.939	1.605
0.687	1.171	0.525	1.605
2.242	0.465	1.969	1.605
2.11	1.08	1.323	1.605
1.474	2.03	0.394	1.595
0.545	0.626	1.262	1.595
1.08	1.666	0.798	1.595
0.353	0.687	0.767	1.595
1.343	1.02	1.313	1.595
0.697	0.505	1.171	1.595
2.201	2.242	1.999	1.595
0.384	0.949	1.878	1.595
1.858	0.404	1.565	1.595
0.677	0.778	0.353	1.595
1.949	1.434	0.959	1.595
0.596	1.909	1.333	1.595
1.343	1.05	1.131	1.595
1.424	1.272	1.07	1.595
0.636	0.586	2.06	1.595
2.07	0.565	1.161	1.595
1.111	0.586	1.757	1.595
0.485	0.858	1.555	1.595
1.979	1.03	1.706	1.595
0.697	1.787	1.212	1.595
1.686	1.606	1.616	1.595
0.353	1.939	1.717	1.595
0.818	0.929	1.919	1.595
0.475	1.282	1.878	1.595
0.939	0.788	1.202	1.595
2.1	0.646	0.979	1.595
2.04	0.505	1.949	1.585
2.07	1.939	2.009	1.585
1.787	1.808	1.03	1.585
1.747	1.888	1.848	1.585
2.262	1.848	1.585	1.585
2.201	1.353	1.797	1.585
0.656	1.424	1.565	1.585
0.525	1.323	1.424	1.585
0.616	0.424	2.009	1.585
0.606	1.737	1.656	1.585
1.767	1.888	1.383	1.585
2.333	0.737	1.131	1.585
1.04	1.394	0.464	1.585
2.211	2.282	1.131	1.585
0.959	0.919	0.767	1.585
1.212	1.585	2.06	1.585
1.091	1.868	1.747	1.585
1.151	2.009	0.525	1.585
1.383	0.414	0.505	1.585
1.525	1.787	1.03	1.585
0.374	1.757	0.989	1.575
0.374	2.222	0.505	1.575
0.636	2.121	0.777	1.575
2.02	1.04	0.515	1.575
0.353	0.818	1.949	1.575
1.848	1.202	0.404	1.575
0.414	1.181	0.989	1.575
0.576	0.808	1.535	1.575
1.424	2.222	0.515	1.575
0.525	1.04	2.242	1.575
1.707	1.262	1.939	1.575
0.939	1.252	0.656	1.575
0.495	0.465	1.747	1.575
0.424	1.303	1.111	1.575
0.879	0.475	0.798	1.575
0.788	1.606	0.878	1.575
0.596	0.697	0.777	1.575
1.313	1.303	0.939	1.575
1.565	0.545	1.101	1.575
2.393	0.727	0.404	1.575
0.919	0.353	0.545	1.575
0.747	0.374	1.383	1.575
1.454	0.969	1.333	1.575
0.465	0.505	0.989	1.575
1.737	0.868	1	1.575
1.676	1.434	1.222	1.575
0.515	0.707	0.475	1.575
0.727	1.06	1.262	1.575
0.646	1.454	1.111	1.565
1.101	0.535	1.686	1.565
1.424	0.677	1.363	1.565
0.353	0.565	1	1.565
0.717	1.747	1.868	1.565
2.05	0.606	1.414	1.565
0.889	0.565	2.06	1.565
0.939	0.384	1.747	1.565
1.394	1.434	1.727	1.565
1.646	0.737	2.151	1.565
1.282	0.384	1.403	1.565
0.899	1.323	1.141	1.565
1.646	2.646	0.464	1.565
0.697	0.434	1.807	1.565
0.525	0.394	0.858	1.565
0.868	0.606	2.06	1.565
0.646	0.909	0.757	1.565
0.899	0.565	1.474	1.565
1.484	1.05	1.434	1.565
0.818	0.434	1.575	1.565
0.767	0.454	0.394	1.565
0.848	0.919	1.656	1.565
1.888	0.485	0.878	1.565
1.878	1.121	2.373	1.565
1.222	2.171	1.303	1.565
1.141	0.353	1.434	1.565
0.838	0.939	0.899	1.555
0.434	1.424	0.404	1.555
1.05	0.535	1.121	1.555
1.333	1.08	0.989	1.555
0.939	1.101	1.646	1.555
0.798	1.091	1.03	1.555
1.111	0.899	0.525	1.555
0.444	0.626	0.767	1.555
1	0.717	0.959	1.555
0.919	2.131	1.02	1.555
1.646	0.899	0.969	1.555
0.717	1.343	1.747	1.555
0.959	2.423	0.505	1.555
1.181	0.666	1.484	1.555
0.606	0.404	1.212	1.555
0.808	0.364	1.181	1.555
0.394	0.636	0.404	1.555
0.99	1.323	0.404	1.555
1.979	0.374	0.363	1.555
0.374	0.555	0.959	1.555
0.545	1.293	1.161	1.555
0.535	0.757	1.717	1.555
1.394	0.555	1.515	1.555
0.384	0.454	1.292	1.555
1.03	0.838	0.576	1.555
1.848	0.576	0.606	1.555
0.697	0.939	1.545	1.555
1.242	1.151	0.989	1.545
1.212	1.626	1.898	1.545
0.414	0.414	1.929	1.545
0.404	0.899	0.545	1.545
0.414	1.404	0.798	1.545
0.364	1.08	1.121	1.545
2.171	0.868	1.101	1.545
0.879	1.192	1.696	1.545
2.222	1.424	1.141	1.545
0.818	0.666	1.656	1.545
0.677	0.707	1.545	1.545
1.616	0.364	2.494	1.545
1.565	0.565	0.767	1.545
0.636	1.454	1.585	1.545
0.889	0.616	0.676	1.545
0.969	1.04	1.272	1.545
0.364	2.08	0.777	1.545
0.727	2.464	0.505	1.545
1.434	0.949	0.475	1.545
0.697	0.465	0.495	1.545
1.222	0.565	1.02	1.545
1.161	0.949	1.717	1.545
1.515	1.727	0.444	1.545
0.818	1.373	1.111	1.545
1.808	1.04	1.121	1.545
1.262	0.626	1.353	1.545
1.181	0.495	0.757	1.545
1.04	0.444	1.949	1.535
2.514	0.636	0.606	1.535
1.01	0.868	1.605	1.535
1.06	1.494	0.495	1.535
0.697	0.434	0.757	1.535
1.101	0.636	1.09	1.535
1.707	0.475	1.434	1.535
1.818	0.707	1.787	1.535
1.141	0.868	1.676	1.535
1.434	1.838	0.777	1.535
0.454	0.939	0.979	1.535
1.323	0.838	0.919	1.535
0.616	1.06	0.757	1.535
2.07	2.07	1.232	1.535
1.585	0.666	1.171	1.535
0.697	0.666	1.535	1.535
1.05	0.394	1.08	1.535
0.868	2.242	1.444	1.535
0.434	1.696	0.757	1.535
0.899	1.949	0.363	1.535
1.242	0.565	0.464	1.525
1.04	0.596	1.05	1.525
1.989	0.828	0.394	1.525
0.646	0.747	1.161	1.525
2.413	0.687	1.101	1.525
0.606	1.888	1.07	1.525
1.969	0.535	1.09	1.525
0.424	0.889	1.626	1.525
1.192	1.04	2.08	1.525
1.616	0.747	1.03	1.525
0.747	1.04	1.03	1.525
0.707	0.535	1.717	1.525
2.161	0.808	0.475	1.525
1.808	0.535	0.676	1.525
0.747	0.747	0.656	1.525
0.586	0.505	1.181	1.525
0.636	1.272	1.393	1.525
1.323	0.616	1.414	1.525
1.666	1.434	1.09	1.525
0.374	1.091	0.798	1.525
0.606	1.909	0.464	1.525
1.343	1.999	2.242	1.525
1.414	0.757	0.798	1.525
1.707	1.767	1.303	1.525
1.777	0.545	0.353	1.515
2.403	1.06	1.191	1.515
0.727	2.161	0.363	1.515
1.262	0.606	1.202	1.515
0.737	1.282	0.464	1.515
0.919	1.08	0.798	1.515
1.252	1.414	1.131	1.515
1.091	0.586	2.161	1.515
0.444	1.676	1.737	1.515
1.555	1.888	1.252	1.515
0.99	2.353	1.949	1.515
1.787	1.373	0.939	1.515
1.737	1.04	1.545	1.515
1.646	0.525	2.019	1.515
1.707	0.616	1.969	1.515
0.505	0.879	1.777	1.505
1.525	0.737	1.585	1.505
0.858	0.666	0.878	1.505
0.959	0.525	1.949	1.505
1.898	1.282	0.656	1.505
1.293	0.424	0.676	1.505
0.737	1.909	1.555	1.505
0.858	0.767	1.484	1.505
0.596	0.495	2.009	1.505
1.07	1.464	1.101	1.505
1.818	1.394	1.525	1.505
1.272	0.465	0.858	1.505
0.808	0.868	2.383	1.505
1.232	0.919	1.504	1.505
0.828	0.727	2.06	1.504
0.515	0.485	0.384	1.504
0.889	1.474	1.878	1.504
0.555	1.293	1.191	1.504
1.232	0.394	1.08	1.504
0.677	0.879	2.454	1.504
0.979	1.323	1.04	1.504
0.687	0.606	1.474	1.504
0.596	1.515	1.555	1.504
0.404	0.979	1.706	1.494
1.323	1.282	1.929	1.494
0.414	1.969	0.919	1.494
1.999	1.353	1.01	1.494
0.687	0.384	0.444	1.494
0.495	0.889	1.807	1.494
0.465	1.03	1.605	1.494
1.06	1.979	0.495	1.494
0.666	0.535	0.656	1.494
0.475	0.656	1.212	1.494
0.868	1.01	1.949	1.494
0.444	0.939	1.747	1.494
1.141	0.909	1.979	1.494
0.99	1.373	1.747	1.494
1.151	1.03	2.454	1.494
1.363	0.586	1.232	1.494
2.04	0.929	1.686	1.494
1.676	1.131	0.858	1.494
0.596	1.08	0.353	1.494
2.07	1.717	1.171	1.494
1.151	2.636	2.221	1.494
0.364	0.565	2.1	1.494
0.778	0.384	1.747	1.494
0.515	2.353	1.525	1.494
0.465	0.444	2.161	1.494
0.979	0.778	1.111	1.494
0.424	1.091	1.202	1.494
0.767	1.727	1.343	1.494
0.374	1.091	0.939	1.494
0.424	0.959	2.029	1.494
0.727	1.555	1.02	1.484
0.737	1.111	1.191	1.484
1.565	1.929	1.535	1.484
2.312	0.535	1.626	1.484
0.404	1.333	0.576	1.484
0.505	1.555	1.424	1.484
1.787	1.151	1.605	1.484
0.858	1.08	0.464	1.484
1.404	1.858	1.323	1.484
0.687	1.595	0.777	1.484
0.545	0.656	1.202	1.484
1	1.575	2.363	1.484
2.03	1.808	1.272	1.484
1.505	0.808	2.201	1.484
0.606	2.262	1.363	1.484
0.626	0.636	0.757	1.484
0.666	1.101	1.161	1.484
0.788	2.222	0.464	1.484
0.404	1.03	0.939	1.484
0.364	0.959	0.384	1.484
0.495	1.373	0.404	1.484
0.414	2.595	1.838	1.484
0.939	0.717	0.878	1.484
1.585	1.111	0.374	1.484
0.404	1.595	0.495	1.474
0.535	0.454	1.929	1.474
0.424	0.677	0.384	1.474
1.404	1	0.404	1.474
0.889	0.576	1.717	1.474
1.919	0.697	0.939	1.474
1.959	0.495	0.404	1.474
1.373	0.565	2.242	1.474
2.373	0.353	1.05	1.474
0.414	0.99	0.485	1.474
1.595	2.131	0.656	1.474
0.384	0.596	1.504	1.474
1.555	0.737	2.221	1.474
2.07	1.111	1.292	1.474
1.909	1.07	1.807	1.474
0.364	2.343	0.868	1.474
1.03	2.191	1.373	1.474
0.394	0.374	1.565	1.474
1.545	0.868	0.798	1.474
0.767	1.818	1.333	1.474
1.08	0.979	0.919	1.474
0.747	1.656	0.858	1.474
0.687	0.778	0.515	1.474
1.333	0.697	1.101	1.474
0.586	1.454	1.727	1.464
1.192	0.687	0.384	1.464
0.868	1.474	1.363	1.464
0.848	0.596	2.272	1.464
2.393	0.545	0.464	1.464
0.475	0.394	1.202	1.464
0.555	0.939	1.161	1.464
1.08	1.676	0.394	1.464
0.848	1.07	0.989	1.464
0.454	2.211	1.151	1.464
1.505	0.515	1.161	1.464
1	1.08	1.515	1.464
0.808	1.727	2.06	1.464
1.232	0.485	1.282	1.464
0.899	0.495	1.212	1.464
1.101	0.505	0.606	1.464
0.99	0.384	0.889	1.464
1.03	0.606	1.373	1.464
0.465	0.677	2.05	1.464
0.414	1.131	1.08	1.464
0.353	1.222	0.798	1.464
0.626	1.05	0.576	1.454
0.495	1.484	0.394	1.454
0.798	1.646	2.262	1.454
0.666	2.545	2.322	1.454
1.07	2.131	1.03	1.454
0.586	1.01	1.949	1.454
0.737	0.727	1.373	1.454
1.02	1.646	1.373	1.454
1.161	1.767	2.029	1.454
0.969	1.878	1.858	1.454
1.303	1.666	2.474	1.454
1.525	0.959	1.787	1.454
0.919	1.282	1.212	1.454
2.444	1.484	2.06	1.454
1.293	1.464	0.868	1.454
0.444	0.737	0.878	1.454
0.666	0.465	1.696	1.454
1.555	1.202	0.515	1.454
0.636	2.393	1.908	1.454
1.394	0.525	1.434	1.454
0.444	0.586	0.889	1.454
0.788	0.606	0.676	1.454
0.434	2.353	1.101	1.454
1.04	0.515	1.282	1.454
1.979	2.07	0.576	1.454
1.727	1.454	0.919	1.454
0.949	1.363	1.333	1.454
1.929	1.464	1.605	1.454
1.999	1.444	1.595	1.444
1.818	1.111	1.575	1.444
1.686	1.111	2.06	1.444
0.414	1.636	1.767	1.444
1.343	0.959	0.545	1.444
1.858	0.919	0.384	1.444
1.949	0.606	2.08	1.444
1.07	0.919	1.05	1.444
0.364	0.394	0.515	1.444
1.444	0.505	0.899	1.444
1.101	0.848	0.505	1.444
0.717	0.364	1.07	1.444
1.424	1.202	0.757	1.444
0.99	1.373	1.686	1.444
0.535	1	2.05	1.444
0.505	0.889	1.363	1.444
0.525	1.535	1.646	1.444
0.757	2.232	1.898	1.444
0.879	2.08	0.515	1.434
1.383	1.727	2.029	1.434
1.04	1.828	2.383	1.434
1.434	1.787	1.262	1.434
0.364	0.565	0.989	1.434
0.505	1.101	0.889	1.434
1.151	0.828	1.161	1.434
1.161	2.373	1.323	1.434
0.858	1.999	1.303	1.434
0.899	1.171	0.989	1.434
0.434	1.414	1.05	1.434
2.323	1.101	1.828	1.434
0.747	1.858	1.929	1.434
1.575	0.889	0.959	1.434
1.03	1.484	0.404	1.434
1.262	1.101	1.403	1.434
0.565	0.757	0.353	1.434
0.99	0.565	1.05	1.434
2.191	0.515	1.333	1.434
0.636	0.889	1.04	1.434
0.99	1.161	1.949	1.434
0.374	1.192	0.798	1.434
0.515	0.414	2.1	1.434
0.808	0.475	0.384	1.434
2.03	0.414	1.03	1.424
0.586	1.555	0.989	1.424
0.919	0.838	0.485	1.424
1.141	0.384	0.485	1.424
0.868	0.364	0.353	1.424
1.08	0.414	0.505	1.424
2.141	1.07	1.161	1.424
2.03	0.788	1.363	1.424
1.474	2.1	0.899	1.424
0.798	1.353	1.403	1.424
0.848	0.99	1.949	1.424
1.02	0.717	0.565	1.424
2.171	1.444	0.464	1.424
1.686	0.707	1.666	1.424
2.04	0.374	1.121	1.424
0.858	0.939	1.272	1.424
1.565	1.646	1.696	1.424
1.242	0.424	0.969	1.414
1.444	0.99	1.121	1.414
1.414	1.494	1	1.414
1.494	1.454	0.464	1.414
1.07	0.778	1.383	1.414
1.03	0.757	0.374	1.414
0.374	2.05	0.404	1.414
0.727	0.818	0.404	1.414
1.131	1.192	0.404	1.414
1.192	0.616	2.141	1.414
1.293	0.636	0.505	1.414
0.828	0.737	1.636	1.414
0.767	2.06	0.475	1.414
0.495	0.909	1.666	1.414
0.565	1.737	1.131	1.414
0.707	1.717	0.485	1.414
1.141	0.818	1.747	1.414
1.414	1.424	0.899	1.414
1.717	0.626	0.565	1.414
1.737	0.444	1.08	1.414
0.687	0.434	1.949	1.414
2.191	0.636	1.03	1.414
0.767	0.858	0.495	1.404
2.131	0.899	0.959	1.404
1.444	0.535	1.07	1.404
1.545	0.454	1.252	1.404
1.02	1.131	1.272	1.404
1.272	0.899	0.878	1.404
1.192	1.05	1.212	1.404
1.606	2.615	1.01	1.404
0.909	0.525	1.222	1.404
1.06	1.02	0.495	1.404
1.666	1.616	0.606	1.404
1.727	1.404	0.384	1.404
1.131	0.465	2.151	1.404
1.02	1.303	0.384	1.404
0.424	0.767	1.747	1.404
0.576	0.747	1.202	1.404
2.555	1.585	0.374	1.404
0.535	1.111	1.353	1.404
0.979	1.707	0.676	1.403
1.606	0.515	1.333	1.403
0.646	0.374	1.191	1.403
0.454	0.626	0.777	1.403
0.485	1.202	0.576	1.403
0.727	1.01	1.353	1.403
0.596	0.364	1.373	1.403
0.576	0.949	0.515	1.394
1.525	0.565	1.121	1.394
0.576	1.08	0.545	1.394
1.08	0.434	0.384	1.394
1	0.757	2.272	1.394
2.423	0.747	2.282	1.394
0.757	0.666	0.475	1.394
0.858	0.687	1.525	1.394
1.515	1.818	1.767	1.394
1.131	2.09	1.313	1.393
1.141	1.242	1.212	1.393
2.11	0.707	1	1.393
1.424	0.394	1.706	1.393
0.555	1	1.494	1.393
1.515	0.747	1.07	1.393
0.737	1.07	1.111	1.393
1.151	1.525	1.616	1.383
0.495	1.636	0.464	1.383
1.232	0.626	0.939	1.383
0.505	0.616	1.01	1.383
1.08	1.828	0.505	1.383
1.05	1.242	1	1.383
0.949	1.151	1.747	1.383
1.616	0.747	0.394	1.383
0.929	1.505	0.717	1.383
0.515	1.01	1.545	1.383
2.454	0.687	0.767	1.383
2.646	0.909	0.858	1.383
0.818	0.364	0.606	1.383
2.333	0.687	0.515	1.383
0.858	1.747	0.374	1.383
1.909	0.394	1.777	1.383
0.565	0.606	1.535	1.383
0.778	0.707	0.606	1.383
0.717	0.778	1.424	1.383
1.333	0.656	2.231	1.383
1.394	0.576	0.767	1.383
0.757	1.04	1.212	1.383
1.696	0.586	1.949	1.383
0.434	0.939	1.232	1.383
0.808	0.586	1.131	1.383
0.555	0.394	1.595	1.383
0.979	0.636	1.484	1.383
0.525	0.757	1.898	1.383
0.606	0.687	0.475	1.383
1.404	0.838	1.202	1.373
0.353	0.656	0.676	1.373
1.535	0.515	1.09	1.373
0.798	0.465	1.767	1.373
0.636	0.939	0.868	1.373
1.222	1.505	1.262	1.373
0.576	0.707	1.141	1.373
0.979	0.727	0.394	1.373
2.05	0.444	1.181	1.373
1.363	2.06	1.121	1.373
0.444	0.949	0.676	1.373
1.525	0.656	1.535	1.373
1.494	1.404	0.444	1.373
1.03	0.636	1.656	1.373
0.949	0.555	0.606	1.373
0.394	0.576	0.475	1.373
2.1	0.646	0.475	1.373
0.909	0.454	2.514	1.373
2.141	0.485	1.393	1.373
0.959	0.727	2.029	1.373
1.293	0.99	1.696	1.373
0.818	1.05	0.858	1.373
1.686	0.889	0.767	1.373
1.878	0.394	1.535	1.373
1.414	0.444	1.535	1.373
1.282	0.636	1.131	1.373
0.636	0.596	1.111	1.373
0.969	0.646	0.576	1.373
0.899	1.353	0.545	1.373
1.272	0.404	0.404	1.373
0.959	0.747	0.495	1.373
0.778	0.515	0.384	1.373
0.505	0.384	1.333	1.373
1.222	0.969	1.03	1.373
1.484	0.586	0.363	1.373
1.212	0.687	1.343	1.373
1.777	0.828	1.696	1.373
1.08	2.242	1.373	1.373
0.374	0.515	0.878	1.373
0.596	1.929	0.384	1.373
0.788	0.697	1.03	1.373
1.151	0.404	1.303	1.373
0.374	1.252	1.131	1.373
1.121	1.05	0.858	1.363
1.121	2.575	1.414	1.363
0.353	1.03	2.322	1.363
0.707	1.464	1.373	1.363
1.414	0.535	1.474	1.363
1.202	0.808	1.212	1.363
1.091	0.697	2.06	1.363
0.879	1.232	1.464	1.363
0.818	0.737	0.505	1.363
0.808	0.384	2.383	1.363
0.586	2.02	0.717	1.363
1.454	0.979	0.989	1.363
0.727	0.717	0.646	1.363
0.798	1.05	1.878	1.363
0.555	0.889	1.828	1.363
1.394	1.04	1.575	1.363
1.07	1.212	1.525	1.363
1.444	0.848	0.464	1.363
1.373	0.717	1.09	1.363
1.202	0.666	1.918	1.363
0.666	0.778	1.464	1.363
1.383	1.636	0.404	1.363
1.616	0.656	1.767	1.363
0.586	1.727	1.403	1.363
0.858	0.788	1.434	1.363
1.02	0.939	1.767	1.363
1.525	2.141	1.848	1.363
0.707	0.909	0.656	1.363
0.979	0.495	0.384	1.363
1.303	0.798	0.878	1.363
1.878	1.979	1.252	1.363
0.353	0.959	1.313	1.353
1.404	0.868	0.576	1.353
0.374	1.585	0.384	1.353
0.616	1.171	2.06	1.353
0.828	0.767	0.767	1.353
1.323	1.282	0.485	1.353
0.394	0.909	1.262	1.353
0.606	0.646	1.171	1.353
1.919	1.202	1.04	1.353
0.576	0.485	1.727	1.353
0.646	0.828	0.656	1.353
0.778	0.737	1.222	1.353
0.838	1.202	1.343	1.353
0.555	1.111	1.444	1.353
2.171	1.06	1.929	1.353
1.03	0.767	1.545	1.353
0.596	0.737	0.444	1.353
1.313	1.171	2.029	1.353
0.939	0.889	0.989	1.353
1.131	1.171	1	1.353
2.535	2.09	1.767	1.353
0.444	1.989	0.394	1.353
0.535	0.384	0.656	1.353
1.767	1.484	1.313	1.353
1.131	0.444	0.576	1.353
2.201	0.626	1.767	1.353
1.686	1.394	1.161	1.353
0.727	0.808	1.01	1.353
0.747	1.787	0.868	1.353
0.848	0.475	1.151	1.353
0.364	0.798	1.585	1.353
2.07	0.687	1.858	1.353
1.181	1.676	1.414	1.353
0.444	0.424	0.798	1.353
0.717	0.858	1.676	1.353
1.626	0.475	1.605	1.353
1.222	0.394	1.959	1.353
0.889	0.687	0.515	1.353
1.757	1.091	1.181	1.343
1.434	0.858	0.878	1.343
1.626	0.545	0.656	1.343
1.515	0.475	0.384	1.343
2.272	1.303	1.212	1.343
0.515	0.656	0.353	1.343
0.858	0.687	0.505	1.343
0.868	0.394	1.605	1.343
1.646	0.939	1.403	1.343
0.868	0.596	1.414	1.343
0.555	0.838	1.08	1.343
1.141	0.959	2.231	1.343
0.959	0.818	1.323	1.343
0.899	0.384	1	1.343
1.252	0.666	1.03	1.343
0.454	0.424	1.202	1.343
1.636	1.535	0.717	1.343
1.646	0.525	2.06	1.343
0.414	0.525	1.333	1.343
0.525	1.01	0.394	1.343
0.364	0.687	1.393	1.343
0.353	0.515	1.151	1.343
0.879	0.889	2.1	1.343
0.394	0.586	1.424	1.333
2.323	1.414	2.019	1.333
0.576	0.525	0.545	1.333
0.414	1.01	0.353	1.333
1.181	0.798	1.04	1.333
0.444	0.687	0.979	1.333
0.576	0.767	0.899	1.333
1.111	1.585	1.04	1.333
2.07	0.666	0.989	1.333
2.555	1.414	1.02	1.333
0.909	1.747	2.454	1.333
1.898	0.636	0.394	1.333
1.181	0.798	1.363	1.333
0.687	0.808	0.656	1.333
0.848	0.394	0.565	1.333
0.697	0.747	1.929	1.333
0.838	1.161	1.525	1.333
0.586	1.212	0.646	1.333
0.727	1.454	1.111	1.333
1.929	2.04	1.323	1.333
0.586	1.272	1.191	1.333
0.899	0.525	2.252	1.333
1.545	0.747	1.484	1.333
1.131	1.222	1.02	1.333
0.687	1.636	1.303	1.333
1.919	0.596	1.111	1.333
1.787	1.494	1.575	1.333
2.545	0.717	0.798	1.333
0.949	1.101	1.282	1.333
0.879	2.07	1.949	1.333
1.131	1.929	0.353	1.333
0.586	0.828	0.959	1.333
1.03	1.151	1.515	1.333
0.687	1.727	0.444	1.333
1.929	0.717	2.019	1.323
0.465	1.131	0.676	1.323
0.646	0.778	1.161	1.323
1.565	0.475	1.757	1.323
1.04	0.535	1.181	1.323
1.242	1.939	1.908	1.323
1.171	0.586	2.191	1.323
0.697	0.485	1.01	1.323
0.656	0.384	0.899	1.323
2.292	1.848	1.363	1.323
0.697	1.828	0.798	1.323
2.585	1.696	0.656	1.323
1.323	0.808	0.656	1.323
0.596	0.414	1.646	1.323
1.06	1.272	1.101	1.323
0.818	1.929	1	1.323
0.717	0.99	1.222	1.323
0.404	0.535	0.404	1.313
0.485	2.646	1.828	1.313
0.414	1.171	2.413	1.313
0.424	1.626	1.636	1.313
0.454	0.495	1.09	1.313
0.364	0.666	1.101	1.313
2.131	1.262	0.899	1.313
1.777	0.899	1.747	1.313
0.565	0.979	1.676	1.313
2.262	0.697	0.414	1.313
0.444	1	1.444	1.313
1.898	1.505	1.08	1.313
2.232	0.798	0.464	1.313
1.898	1.07	0.565	1.313
2.292	0.747	0.485	1.313
0.364	0.374	1.515	1.313
0.485	2.141	0.939	1.313
0.394	1.323	0.676	1.313
0.444	0.939	1.343	1.313
0.737	1.293	0.576	1.313
1.202	1.293	0.707	1.313
1.05	1.656	0.959	1.313
1.969	1.323	1.03	1.313
0.828	0.535	1.949	1.313
1.606	0.606	0.404	1.313
0.818	0.717	2.524	1.313
0.848	1.696	1.08	1.313
1.606	1.171	1.434	1.313
1.242	0.616	0.939	1.313
0.687	1.262	2.11	1.313
0.596	0.384	1.807	1.303
0.767	1.171	0.374	1.303
0.495	0.444	0.646	1.303
1.121	1.444	0.939	1.303
1.515	0.444	1.828	1.303
1.03	0.939	0.919	1.303
0.848	1.131	1.686	1.303
1.202	1.181	1.151	1.303
0.636	0.697	1.131	1.303
1.797	0.505	2.342	1.303
1.242	0.626	0.757	1.303
0.959	0.737	0.485	1.303
1.161	1.151	1.202	1.303
0.959	1.606	0.858	1.303
1.888	0.606	1.656	1.303
1.293	1.272	2.07	1.303
0.515	0.636	1.07	1.303
0.687	0.949	2.06	1.303
0.909	1.686	1.02	1.303
1.575	0.535	1.141	1.303
0.606	0.889	1.565	1.303
1.595	0.919	0.939	1.303
1.424	0.737	1.989	1.303
0.515	1	1.737	1.303
1.06	0.939	2.464	1.303
1.313	1.141	0.798	1.293
0.353	1.252	1.454	1.293
0.687	0.919	0.767	1.293
1.02	1.121	1.868	1.293
0.798	0.475	1.131	1.293
1.676	0.818	1.777	1.293
0.444	0.959	0.919	1.293
1.07	1.01	1.696	1.293
1.151	2.191	1.454	1.293
1.585	1.505	1.646	1.293
0.424	1.08	1.706	1.293
0.495	0.727	1.747	1.293
2.151	1.727	1.232	1.293
2.353	0.697	0.676	1.293
1.737	1.333	1.08	1.293
2.393	0.879	1.504	1.293
0.899	0.454	1.06	1.293
0.969	0.969	0.858	1.292
0.767	1.101	1.494	1.292
0.515	0.979	0.979	1.292
1.434	0.444	1.212	1.292
0.374	1.606	1.383	1.292
0.636	1.373	1.747	1.292
0.778	1.394	1.141	1.292
2.272	0.818	1.171	1.292
0.677	1.373	1.272	1.292
0.353	0.384	0.878	1.292
0.666	1.525	1.02	1.292
0.465	0.919	0.485	1.292
1.666	1	0.868	1.292
1.272	0.949	1.929	1.282
2.302	1.777	0.475	1.282
0.353	0.545	1.04	1.282
0.565	0.656	1.212	1.282
1.313	1.444	0.485	1.282
1.131	0.535	0.858	1.282
2.02	0.636	0.404	1.282
0.434	0.596	0.878	1.282
1.04	0.848	1.383	1.282
1.252	1.252	0.868	1.282
0.485	0.899	1.565	1.282
1.929	1.484	2.151	1.282
0.969	0.606	1.696	1.282
0.868	0.646	0.475	1.282
0.596	2.211	0.899	1.282
1.383	0.525	0.444	1.282
1.262	0.606	0.414	1.282
0.636	2.312	2.383	1.282
0.586	1.111	1.111	1.282
0.959	0.454	1.949	1.282
0.747	0.545	1.272	1.282
0.404	2.131	1.515	1.282
0.384	1.525	0.515	1.282
1.161	1.626	1.616	1.282
0.889	1.828	0.515	1.282
0.838	0.666	0.444	1.282
0.808	0.899	0.525	1.282
0.707	1.282	1.565	1.282
1.151	2.141	1.191	1.282
1.101	0.737	1.807	1.282
1.424	0.525	1.353	1.282
1.444	2.292	1.747	1.282
1.252	0.616	1.504	1.282
1.797	0.374	1.555	1.282
1.747	0.909	1.111	1.282
1.01	1.686	2.242	1.282
0.767	0.384	1.131	1.282
0.485	0.969	1.474	1.282
0.929	0.697	1.08	1.282
1.303	2.272	1.161	1.272
1.696	2.09	0.626	1.272
0.687	0.636	0.515	1.272
0.687	0.505	0.878	1.272
1.818	0.586	2.262	1.272
0.394	0.99	1.262	1.272
1.686	0.808	1.636	1.272
0.808	0.788	0.394	1.272
0.414	0.454	1.03	1.272
1.04	0.798	1.494	1.272
1.01	1.606	1.626	1.272
1.656	1.494	0.767	1.272
1.555	0.909	0.979	1.272
2.464	0.979	1	1.272
1.686	0.949	0.676	1.272
1.313	1.737	2.242	1.272
0.364	1.989	1.292	1.272
0.475	1.272	0.565	1.272
0.454	0.475	1.333	1.272
0.434	1.848	0.808	1.272
1.989	1.858	1.403	1.272
0.939	0.535	0.394	1.272
0.616	0.384	1.646	1.272
0.687	0.969	0.606	1.272
1.646	0.778	0.858	1.272
1.02	0.979	1.585	1.272
0.697	0.838	1.232	1.272
0.515	2.191	0.525	1.272
0.828	1.212	0.656	1.272
0.798	0.828	1.202	1.272
0.949	0.646	1.929	1.262
0.889	1.091	0.949	1.262
0.434	0.929	0.676	1.262
0.838	0.707	1.616	1.262
0.969	1.08	0.919	1.262
1.252	0.636	2.242	1.262
0.475	0.808	1.02	1.262
0.394	0.767	0.374	1.262
1.262	2.131	0.707	1.262
0.353	1.575	1.02	1.262
1.08	2.232	1.292	1.262
1.555	0.353	1.171	1.262
0.707	0.384	2.433	1.262
0.778	0.747	0.626	1.262
1.091	1.131	2.09	1.262
2.646	0.384	1.232	1.262
0.697	1.01	1.908	1.262
1.171	1.181	1.202	1.262
0.374	1.141	1.555	1.262
1.08	0.555	1.252	1.262
0.666	2.201	1.616	1.262
1.747	1.343	1.161	1.262
1.272	0.798	0.919	1.252
0.384	1.595	0.384	1.252
1	0.889	1.565	1.252
0.384	0.919	1.363	1.252
1.171	1.282	1.747	1.252
1.131	1.08	1.504	1.252
0.899	1.121	2.171	1.252
2.02	0.525	2.141	1.252
0.454	1.242	0.646	1.252
1.131	0.374	0.626	1.252
0.515	0.636	0.485	1.252
0.656	0.687	1.181	1.252
1.252	0.525	0.969	1.252
0.555	2.131	1.454	1.252
2.282	1.404	1.858	1.252
0.919	1.232	0.384	1.252
0.535	2.232	1.434	1.252
0.364	1.484	0.545	1.252
0.757	1.03	1.01	1.252
0.535	0.858	1.929	1.252
0.434	1.131	1.605	1.252
0.677	1	0.525	1.252
0.848	1.101	0.676	1.252
0.454	0.889	2.342	1.252
[truncated: 8,527 more rows]

## Sheet: Figure S4J
Figure 4-figure supplement 1J. BODIPY levels under LD metabolism knockdown.
luci	dgat-2i	atgl-1i
10.08	16.39	38.407
12.97	20.211	43.513
16.28	11.372	39.364
19.7	15.7	42.636
22.29	15.326	34.445
12.71	20.086	37.695
23.32	15.277	44.924
12.84	16.606	40.961
15.06	19.667	40.604
21.24	13.962	44.125
26.45	17.035	42.907
19.33	18.501	38.632
28.14	25.118	40.002
24.79	25.523	46.689
20.57	22.421	43.602
17.5	21.036	43.299
26.69	28.289	39.912
27.7	24.206	43.087
29.14	24.992	43.152
23.46	17.444	39.306
41.63	23.981	38.83
23.5	20.732	40.641
18.19	20.675	42.851
18.21	19.663	43.705
24.32	19.574
16.21
