# Supplementary material for: Hexokinase regulates Mondo-mediated longevity via the PPP and organellar dynamics
Source: eLife. 2025 Aug 11;12:RP89225. doi: 10.7554/eLife.89225 (PMC12339002; doi:10.7554/eLife.89225)
Supplement: Figure 4—source data 1. [file elife-89225-fig4-data1.xlsx]

## Sheet: Figure 4A
Figure 4A. IP-MS of MML-1::3xFLAG. Interacting candidates.
MML-1	VIT-4	VIT-1	CLEC-1	CTC-2	MPC-1	FAR-2	VIT-3	MXL-2	PLIN-1	ACOX-1.2	F32A11.1 W09H1.3	F23B12.7	K10C3.5	CEY-2	PQN-22	ACS-13	C43H6.4	T21F4.1	C56G2.1/C56G2.2	LET-767	UGT-22	F44E5.1	BYN-1	UGT-62	TAG-174
7.092	3.862	3.616	3.479	3.418	3.306	3.224	3.171	3.084	3.001	2.972	2.83	2.77	2.749	2.713	2.615	2.572	2.543	2.498	2.491	2.481	2.415	2.361	2.354	2.336	2.245

## Sheet: Figure 4D
Figure 4D. Intensity plot of ROI from Figure 4C.
Distance (microns)	LipiBlue	MML-1::GFP	TOMM-20::mCherry
0	110	109
0.03434	75.428	112.629	361
0.06869	37.193	116.082	365.25
0.10303	19.036	113.452	369.848
0.13737	7.907	102.439	373.656
0.17171	4.308	85.576	374.412
0.20606	1.699	70.66	369.374
0.2404	0.945	58.234	363.24
0.27474	0.9	44.738	354.172
0.30909	2.537	30.974	355.261
0.34343	8.308	18.894	377.966
0.37777	21.051	12.47	444.07
0.41211	37.847	12.801	589.604
0.44646	50.195	23.315	838.566
0.4808	50.423	42.148	1229.48
0.51514	41.369	68.806	1773.2
0.54948	34.743	97.126	2444.8
0.58383	47.082	132.582	3245.27
0.61817	78.694	185.744	4056.98
0.65251	121.057	269.533	4803.82
0.68686	153.096	374.811	5364.44
0.7212	159.054	456.082	5711.64
0.75554	142	479.477	5893.51
0.78988	118.208	430.24	5968.73
0.82423	92.7	349.107	6036.42
0.85857	65.512	282.208	6107.13
0.89291	39.2	239.302	6169.94
0.92726	20.093	218.003	6133.73
0.9616	13.35	211.355	6038.52
0.99594	14.867	202.775	5878.33
1.03028	23.861	200.062	5736.99
1.06463	30.82	199.342	5619.29
1.09897	38.117	224.872	5497.43
1.13331	47.455	270.808	5362.73
1.16765	63.962	316.515	5206.95
1.202	90.367	336.418	5109.9
1.23634	105.355	309.853	5064.19
1.27068	103.692	252.966	5080.76
1.30503	75.851	200.04	5080.11
1.33937	42.219	162.458	4978.77
1.37371	22.309	153.926	4785.49
1.40805	13.773	149.805	4481.33
1.4424	17.269	147.082	4200.15
1.47674	25.641	135.118	3921.85
1.51108	32.856	117.614	3722.6
1.54543	34.087	100.875	3577.3
1.57977	30.902	91.55	3477.77
1.61411	26.074	87.545	3393.38
1.64845	32.615	79.748	3271.57
1.6828	51.374	66.673	3112.5
1.71714	86.513	51.763	2929.18
1.75148	127.16	40.653	2766.91
1.78583	162.256	36.694	2657.52
1.82017	184.343	39.68	2612.99
1.85451	190.098	49.304	2625.69
1.88885	185.831	68.897	2667.25
1.9232	173.764	97.676	2724.02
1.95754	149.872	128.396	2794.54
1.99188	118.48	155.833	2897.02
2.02622	94.004	176.169	3048.64
2.06057	96.246	189.9	3244.02
2.09491	145.752	195.264	3464.67
2.12925	253.331	192.976	3658.09
2.1636	394.906	188.512	3769.71
2.19794	525.79	196.157	3766.93
2.23228	643.018	232.737	3673.84
2.26662	752.621	314.342	3526.8
2.30097	896.833	475.959	3386.42
2.33531	1045.31	712.328	3306.21
2.36965	1232.46	1041.48	3344.8
2.404	1504.52	1418.41	3537.31
2.43834	1896.37	1920.32	3885.29
2.47268	2384.68	2546.95	4346.87
2.50702	2990.67	3411.97	4878.62
2.54137	3595.55	4388.93	5372.58
2.57571	4072.44	5391.52	5823.58
2.61005	4344.38	6097.31	6033.73
2.64439	4321.37	6275.86	6091.31
2.67874	4225.02	6021.8	5888.43
2.71308	4244.81	5544.06	5638.64
2.74742	4425.02	5141.27	5412.66
2.78177	4793.83	4935.91	5293.74
2.81611	5209.62	4898.12	5289.55
2.85045	5519.36	5019.27	5308.92
2.88479	5698.88	5156.13	5296.26
2.91914	5554.59	5324.33	5221.08
2.95348	5161.58	5422.21	5116.77
2.98782	4654.39	5551.65	5079.1
3.02217	4228.86	5685.19	5102.51
3.05651	4013.9	5895.15	5140.49
3.09085	3954.09	6126.68	5110.22
3.12519	3989.2	6378.9	4952.61
3.15954	3981.81	6603.71	4693.24
3.19388	3854.92	6762.22	4399.34
3.22822	3657.73	6778.13	4197.24
3.26257	3565.46	6649.33	4160.47
3.29691	3671.44	6450.47	4262.77
3.33125	3939.78	6238.6	4454.88
3.36559	4235.71	6018.48	4659.6
3.39994	4391.93	5746.5	4845.89
3.43428	4269.99	5377.07	4989.49
3.46862	3846.95	4954.04	5087.86
3.50296	3220.45	4628.53	5117.69
3.53731	2634.64	4519.56	5052.95
3.57165	2239.62	4646.5	4921.88
3.60599	2051.66	4900.62	4716.71
3.64034	2077.73	5171.81	4517.16
3.67468	2247.69	5330.41	4314.52
3.70902	2579.04	5330.67	4102.3
3.74336	3043.36	5242.13	3863.29
3.77771	3342.68	4998.59	3606.37
3.81205	3373.95	4669.13	3464.6
3.84639	2963.79	4186.48	3468.87
3.88074	2399.03	3610	3703.56
3.91508	1872.49	2939.32	4054.93
3.94942	1559.94	2314.04	4498.77
3.98376	1486.28	1791.94	4870.11
4.01811	1452.55	1463.88	5166.11
4.05245	1338.02	1240.65	5315.46
4.08679	1116.02	1055.33	5395.54
4.12114	834.939	854.528	5326.46
4.15548	592.482	637.305	5194.11
4.18982	433.083	451.321	4963.59
4.22416	347.577	323.324	4810.49
4.25851	303.083	281.807	4739.05
4.29285	263.955	276.355	4938.05
4.32719	212.607	286.385	5286.3
4.36153	161.907	275.411	5749.57
4.39588	131.076	249.647	6110.36
4.43022	129.034	223.754	6381.72
4.46456	162.051	216.958	6491.35
4.49891	210.905	244.438	6537.17
4.53325	243.695	309.214	6565.31
4.56759	239.213	381.603	6652.3
4.60193	207.334	417.18	6812.49
4.63628	173.26	390.626	7053.41
4.67062	162.459	324.969	7386.57
4.70496	187.922	265.582	7810.53
4.73931	237.84	248.928	8343.98
4.77365	282.026	275.753	8973.51
4.80799	283.7	324.361	9653.55
4.84233	245.394	348.901	10283.9
4.87668	213.36	337.313	10650.1
4.91102	197.418	295.416	10681.8
4.94536	190.275	240.591	10348.2
4.9797	174.153	192.401	9801.06
5.01405	140.667	149.363	9181.46
5.04839	107.909	129.653	8681.48
5.08273	84.007	129.619	8329.47
5.11708	78.24	158.706	8101.52
5.15142	86.82	198.682	7869.45
5.18576	115.843	239.351	7567.76
5.2201	153.567	259.133	7337.47
5.25445	179.627	262.056	7136.98
5.28879	178.279	249.798	7164.33
5.32313	145.218	254.349	7300.99
5.35748	102.266	273.76	7653.36
5.39182	71.057	314.72	8004.45
5.42616	53.734	372.969	8379.57
5.4605	58.906	416.543	8573.46
5.49485	85.346	438.301	8700.76
5.52919	132.634	420.13	8651.71
5.56353	186.447	379.781	8522.17
5.59788	231.132	349.39	8290.32
5.63222	262.011	344.136	7907.85
5.66656	243.254	352.769	7479.72
5.7009	183.019	362.106	7003.61
5.73525	102.655	359.208	6621.16
5.76959	41.045	344.087	6360.43
5.80393	12.988	320.187	6245.77
5.83827	8.231	281.679	6198.26
5.87262	22.931	226.418	6084.65
5.90696	66.151	171.282	5788.63
5.9413	151.048	132.097	5389.46
5.97565	273.08	116.492	5032.7
6.00999	391.853	118.489	4843.01
6.04433	456.59	128.279	4890.13
6.07867	434.339	136.172	5187.19
6.11302	353.162	144.724	5647.74
6.14736	305.644	172.716	6136.43
6.1817	330.615	241.48	6455.1
6.21605	427.252	340.747	6545.77
6.25039	541.549	430.558	6447.93
6.28473	620.595	470.262	6177.16
6.31907	614.19	435.593	5830.09
6.35342	568.413	353.126	5381.02
6.38776	506.769	265.616	4864.64
6.4221	458.158	198.293	4327.72
6.45644	399.988	154.248	3855.28
6.49079	326.334	127.72	3519.39
6.52513	273.931	107.762	3284.36
6.55947	247.873	95.498	3120.56
6.59382	268.553	84.99	2965.62
6.62816	315	78	2807.49
			2655

## Sheet: Figure 4E
Figure 4E. Manders' Colocalization Coefficient of MML-1::GFP and LipiBlue.
tM1 luci	tM2 luci	tM1 hxk-2i	tM2 hxk-2i
8.3	3.6	10.8	36.2
1.62	2.3	19.7	18.2
4.9	6.9	14.1	12.6
3	3.7	19.7	13.7
2.6	1.6	20.9	12.5
1.9	1.5	25.4	15.1
3.4	3.3	18.8	15.3
3.9	2.2	20.6	14.36
5.23	5.36	18.7	12.6
4.25	3.98	19.36	13.6
4.36	6.32	19.3	25.36
7.25	2.54	15.23	20.58
4.36	6.54	14.39	17.6

## Sheet: Figure 4F
Figure 4F. LD diameter (PLIN-1::mCherry) under hxk-2 and tkt-1 double knockdown.
luci	hxk-2i	tkt-1i	hxk-2i tkt-1i
0.396	0.208	0.167	0.272
0.312	0.187	0.146	0.146
0.271	0.208	0.104	0.23
0.292	0.146	0.125	0.251
0.292	0.104	0.125	0.188
0.187	0.125	0.125	0.272
0.229	0.146	0.104	0.146
0.229	0.167	0.167	0.272
0.167	0.146	0.104	0.209
0.271	0.146	0.125	0.209
0.187	0.125	0.146	0.23
0.229	0.208	0.083	0.251
0.229	0.125	0.083	0.23
0.271	0.104	0.104	0.167
0.354	0.104	0.062	0.209
0.167	0.104	0.104	0.146
0.187	0.146	0.146	0.251
0.208	0.146	0.125	0.104
0.125	0.125	0.083	0.084
0.125	0.104	0.125	0.167
0.167	0.125	0.083	0.209
0.208	0.167	0.104	0.209
0.229	0.167	0.104	0.23
0.146	0.104	0.104	0.146
0.25	0.146	0.146	0.209
0.229	0.104	0.125	0.146
0.167	0.167	0.104	0.292
0.167	0.167	0.104	0.188
0.187	0.104	0.146	0.209
0.167	0.125	0.062	0.125
0.187	0.167	0.083	0.167
0.229	0.187	0.083	0.146
0.187	0.125	0.104	0.104
0.271	0.271	0.104	0.167
0.375	0.167	0.083	0.146
0.146	0.125	0.083	0.187
0.292	0.125	0.125	0.146
0.208	0.125	0.104	0.083
0.208	0.167	0.104	0.187
0.208	0.187	0.104	0.083
0.187	0.104	0.104	0.083
0.229	0.104	0.083	0.146
0.187	0.146	0.083	0.125
0.271	0.167	0.125	0.146
0.229	0.146	0.104	0.146
0.187	0.146	0.125	0.104
0.25	0.187	0.167	0.104
0.146	0.146	0.146	0.146
0.167	0.167	0.125	0.167
0.125	0.125	0.083	0.187
0.229	0.125	0.167	0.125
0.25	0.187	0.104	0.125
0.187	0.125	0.125	0.083
0.187	0.208	0.146	0.104
0.229	0.187	0.125	0.104
0.208	0.167	0.125	0.125
0.271	0.167	0.083	0.062
0.208	0.125	0.146	0.146
0.208	0.104	0.125	0.083
0.271	0.104	0.125	0.083
0.229	0.146	0.125	0.104
0.25	0.167	0.104	0.083
0.25	0.167	0.125	0.104
0.208	0.187	0.125	0.083
0.312	0.167	0.104	0.083
0.333	0.146	0.125	0.125
0.312	0.146	0.125	0.104
0.333	0.125	0.104	0.146
0.229	0.125	0.167	0.167
0.208	0.167	0.167	0.125
0.271	0.187	0.125	0.104
0.229	0.208	0.167	0.104
0.208	0.187	0.083	0.125
0.229	0.167	0.104	0.104
0.167	0.146	0.104	0.187
0.208	0.167	0.125	0.083
0.229	0.167	0.104	0.084
0.25	0.208	0.083	0.063
0.187	0.125	0.146	0.063
0.271	0.167	0.125	0.084
0.271	0.187	0.104	0.125
0.187	0.167	0.104	0.063
0.208	0.25	0.104	0.063
0.187	0.229	0.125	0.125
0.187	0.104	0.125	0.063
0.229	0.104	0.125	0.063
0.167	0.104	0.146	0.063
0.187	0.146	0.146	0.063
0.146	0.125	0.104	0.084
0.187	0.146	0.083	0.063
0.187	0.125	0.125	0.084
0.187	0.125	0.125	0.104
0.104	0.125	0.104	0.104
0.104	0.125	0.104	0.104
0.146	0.167	0.104	0.125
0.146	0.167	0.208	0.104
0.167	0.125	0.125	0.083
0.146	0.229	0.167	0.125
0.208	0.167	0.187	0.083
0.187	0.125	0.125	0.083
0.187	0.208	0.125	0.125
0.146	0.229	0.104	0.083
0.167	0.187	0.167	0.104
0.229	0.187	0.104	0.104
0.125	0.146	0.104	0.083
0.146	0.25	0.104	0.042
0.167	0.208	0.104	0.104
0.146	0.146	0.083	0.104
0.187	0.229	0.104	0.062
0.25	0.146	0.187	0.104
0.208	0.25	0.125	0.146
0.104	0.292	0.125	0.083
0.146	0.125	0.146	0.125
0.167	0.25	0.104	0.083
0.208	0.167	0.125	0.125
0.208	0.167	0.167	0.042
0.125	0.125	0.229	0.083
0.125	0.146	0.125	0.062
0.167	0.167	0.146	0.083
0.187	0.187	0.187	0.083
0.146	0.125	0.187	0.125
0.167	0.125	0.146	0.083
0.146	0.125	0.167	0.125
0.146	0.271	0.167	0.104
0.146	0.187	0.167	0.083
0.208	0.187	0.125	0.083
0.167	0.125	0.167	0.104
0.167	0.146	0.125	0.083
0.167	0.229	0.146	0.104
0.167	0.208	0.229	0.125
0.146	0.187	0.146	0.083
0.104	0.187	0.125	0.042
0.208	0.187	0.146	0.062
0.229	0.187	0.146	0.146
0.125	0.167	0.146	0.104
0.229	0.167	0.146	0.104
0.146	0.125	0.104	0.083
0.125	0.271	0.104	0.083
0.125	0.146	0.083	0.125
0.187	0.167	0.104	0.104
0.167	0.187	0.187	0.104
0.208	0.104	0.125	0.062
0.167	0.104	0.125	0.083
0.146	0.104	0.167	0.083
0.208	0.187	0.125	0.042
0.229	0.271	0.125	0.104
0.187	0.187	0.146	0.083
0.167	0.25	0.125	0.104
0.187	0.167	0.16	0.146
0.208	0.187	0.18	0.167
0.208	0.208	0.14	0.187
0.187	0.167	0.14	0.25
0.146	0.187	0.14	0.125
0.146	0.104	0.08	0.167
0.187	0.292	0.1	0.167
0.187	0.187	0.16	0.146
0.167	0.187	0.08	0.146
0.208	0.25	0.1	0.187
0.271	0.208	0.1	0.208
0.229	0.25	0.12	0.125
0.167	0.208	0.14	0.125
0.104	0.125	0.12	0.125
0.146	0.125	0.14	0.167
0.229	0.146	0.18	0.167
0.208	0.208	0.14	0.167
0.229	0.167	0.14	0.062
0.25	0.25	0.06	0.146
0.125	0.146	0.1	0.104
0.208	0.292	0.14	0.187
0.312	0.187	0.14	0.104
0.208	0.187	0.12	0.104
0.167	0.229	0.12	0.208
0.125	0.208	0.14	0.104
0.208	0.25	0.14	0.229
0.208	0.292	0.1	0.125
0.187	0.229	0.12	0.083
0.208	0.208	0.12	0.062
0.25	0.125	0.12	0.167
0.146	0.187	0.1	0.146
0.187	0.167	0.12	0.208
0.167	0.167	0.08	0.125
0.187	0.187	0.14	0.083
0.229	0.292	0.1	0.125
0.208	0.229	0.1	0.125
0.208	0.146	0.18	0.104
0.229	0.208	0.16	0.083
0.146	0.146	0.12	0.146
0.146	0.187	0.14	0.208
0.104	0.187	0.16	0.104
0.146	0.229	0.12	0.125
0.187	0.208	0.14	0.146
0.229	0.229	0.14	0.062
0.208	0.146	0.1	0.125
0.167	0.146	0.14	0.125
0.208	0.146	0.12	0.167
0.208	0.208	0.08	0.167
0.208	0.187	0.12	0.146
0.104	0.229	0.04	0.312
0.208	0.146	0.1	0.083
0.271	0.208	0.1	0.125
0.208	0.104	0.12	0.146
0.25	0.167	0.12	0.125
0.208	0.167	0.1	0.083
0.271	0.25	0.12	0.146
0.167	0.167	0.14	0.083
0.125	0.125	0.08	0.125
0.229	0.146	0.08	0.229
0.167	0.229	0.14	0.208
0.125	0.208	0.1	0.208
0.187	0.187	0.06	0.167
0.271	0.208	0.08	0.229
0.167	0.271	0.06	0.208
0.312	0.146	0.06	0.125
0.271	0.229	0.08	0.104
0.125	0.208	0.1	0.208
0.167	0.208	0.08	0.187
0.208	0.146	0.08	0.187
0.229	0.125	0.08	0.167
0.208	0.146	0.24	0.271
0.104	0.208	0.12	0.167
0.125	0.187	0.18	0.167
0.25	0.167	0.12	0.187
0.271	0.187	0.16	0.187
0.208	0.229	0.12	0.187
0.25	0.187	0.12	0.146
0.146	0.167	0.14	0.271
0.167	0.25	0.2	0.208
0.208	0.208	0.1	0.167
0.229	0.292	0.1	0.104
0.25	0.25	0.2	0.104
0.229	0.125	0.16	0.042
0.187	0.25	0.1	0.208
0.271	0.208	0.12	0.167
0.229	0.208	0.1	0.25
0.25	0.146	0.1	0.125
0.167	0.208	0.1	0.104
0.167	0.146	0.18	0.25
0.125	0.25	0.1	0.125
0.146	0.146	0.1	0.167
0.167	0.208	0.12	0.083
0.187	0.208	0.18	0.104
0.229	0.187	0.16	0.167
0.167	0.333	0.1	0.167
0.229	0.187	0.1	0.167
0.271	0.25	0.08	0.146
0.229	0.167	0.1	0.104
0.187	0.125	0.18	0.208
0.187	0.167	0.16	0.25
0.25	0.229	0.14	0.104
0.25	0.187	0.12	0.104
0.25	0.146	0.16	0.125
0.208	0.208	0.16	0.104
0.25	0.208	0.14	0.146
0.229	0.208	0.16	0.187
0.146	0.271	0.2	0.208
0.146	0.167	0.18	0.167
0.167	0.229	0.24	0.208
0.104	0.187	0.12	0.25
0.208	0.25	0.2	0.146
0.167	0.229	0.16	0.167
0.187	0.208	0.2	0.146
0.292	0.271	0.14	0.187
0.208	0.312	0.08	0.167
0.187	0.25	0.12	0.125
0.167	0.146	0.12	0.104
0.187	0.208	0.12	0.167
0.208	0.208	0.16	0.208
0.25	0.292	0.08	0.208
0.229	0.208	0.12	0.187
0.271	0.271	0.1	0.167
0.146	0.25	0.14	0.208
0.167	0.292	0.14	0.229
0.187	0.271	0.16	0.208
0.187	0.187	0.14	0.208
0.167	0.167	0.18	0.104
0.25	0.125	0.12	0.104
0.167	0.187	0.14	0.104
0.187	0.146	0.187	0.125
0.271	0.187	0.146	0.146
0.125	0.25	0.187	0.125
0.125	0.167	0.146	0.062
0.208	0.229	0.125	0.146
0.208	0.104	0.104	0.083
0.25	0.125	0.187	0.083
0.208	0.208	0.146	0.146
0.208	0.146	0.146	0.062
0.187	0.208	0.146	0.083
0.167	0.25	0.146	0.104
0.167	0.208	0.146	0.125
0.292	0.271	0.104	0.104
0.146	0.125	0.146	0.146
0.229	0.146	0.167	0.146
0.167	0.167	0.167	0.125
0.187	0.187	0.125	0.104
0.104	0.167	0.146	0.271
0.187	0.208	0.229	0.125
0.146	0.187	0.187	0.146
0.271	0.104	0.187	0.146
0.167	0.167	0.167	0.167
0.125	0.271	0.125	0.125
0.187	0.146	0.167	0.146
0.229	0.208	0.146	0.125
0.167	0.208	0.125	0.125
0.208	0.167	0.187	0.208
0.271	0.104	0.187	0.146
0.167	0.167	0.146	0.125
0.187	0.229	0.146	0.104
0.312	0.292	0.167	0.146
0.146	0.187	0.146	0.104
0.208	0.146	0.146	0.083
0.208	0.229	0.104	0.104
0.125	0.125	0.187	0.104
0.229	0.146	0.167	0.083
0.167	0.187	0.104	0.083
0.208	0.125	0.208	0.104
0.187	0.125	0.187	0.208
0.167	0.312	0.167	0.187
0.229	0.229	0.187	0.083
0.187	0.25	0.146	0.062
0.104	0.167	0.125	0.208
0.146	0.187	0.208	0.187
0.125	0.229	0.167	0.167
0.208	0.271	0.146	0.125
0.271	0.271	0.146	0.208
0.146	0.208	0.187	0.167
0.125	0.271	0.146	0.083
0.083	0.187	0.187	0.146
0.167	0.104	0.146	0.125
0.125	0.167	0.146	0.125
0.208	0.167	0.104	0.187
0.104	0.208	0.167	0.167
0.083	0.167	0.104	0.125
0.167	0.25	0.146	0.125
0.187	0.167	0.25	0.146
0.146	0.167	0.187	0.167
0.125	0.167	0.187	0.083
0.146	0.25	0.146	0.146
0.187	0.208	0.146	0.167
0.25	0.187	0.229	0.167
0.146	0.271	0.167
0.104	0.229	0.125
0.208	0.25	0.208
0.146	0.271	0.083
0.208	0.125	0.104
0.167	0.167	0.125
0.146	0.208	0.25
0.125	0.187	0.125
0.062	0.25	0.146
0.083	0.208	0.125
0.125	0.146	0.125
0.167	0.208	0.187
0.146	0.25	0.125
0.125	0.208
0.125	0.146
0.146	0.208
0.146	0.125
0.167	0.167
0.125	0.229
0.125	0.229
0.187	0.167
0.208	0.187
0.125	0.167
0.167	0.104
0.312	0.125
0.25	0.208
0.187	0.229
0.208	0.167
0.167	0.312
0.292	0.333
0.312	0.292
0.229	0.187
0.208	0.312
0.187	0.271
0.167	0.146
0.229	0.312
0.208	0.167
0.208	0.229
0.125	0.146
0.125	0.167
0.104	0.187
0.208	0.187
0.146	0.208
0.167	0.229
0.104	0.292
0.167	0.187
0.146	0.229
0.125	0.25
0.104	0.167
0.146	0.167
0.125	0.104
0.271	0.229
0.083	0.229
0.208	0.333
0.146	0.167
0.125	0.167
0.167	0.125
0.125	0.292
0.104	0.167
0.104	0.167
0.125	0.208
0.229	0.208
0.167	0.167
0.187	0.125
0.208	0.146
0.229	0.167
0.187	0.125
0.25	0.208
0.187	0.208
0.146	0.167
0.146	0.167
0.125	0.354
0.125	0.167
0.187	0.167
0.229	0.167
0.312	0.312
0.187	0.146
0.208	0.146
0.146	0.292
0.125
0.104
0.146
0.229
0.167
0.229
0.062
0.146
0.104
0.167
0.229
0.437
0.146
0.083
0.062
0.062
0.125

## Sheet: Figure 4G
Figure 4G. MML-1::GFP nuclear localization under LD metabolism knockdown.
luci	dgat-2i	atgl-1i
3.48	8.78	1.19
1.88	2.99	1.07
2.4	2.06	1.41
2.21	4.64	1.17
1.48	3.17	1.07
2.18	2.01	1.29
2.91	1.23	0.91
3.3	1.26	0.9
2.98	2.09	1.1
4.01	3.29	1.21
3.4	2.06	1.69
1.6	3.59	1.28
1.28	2.02	0.92
1.49	1.41	2
1.19	1.18	0.81
2.41	1.14	0.92
1.95	3.65	0.83
1.23	2.56	1.03
2.46	3.53	1.32
2.21	2.34	1.16
1.32	2.36	1.15
2.82	3.04
1.22	4.17
3.54	3.69
3.59	3.42
2.64	4.06
2.61	2.64
0.85	6.68
1.32	2.64
1.97	6.84
2.01	2.09
1.61	3.22
1.35	3.24
2.34	3.46
1.12	5.27
1.97
2.51
2.31
2.52
2.89
1.72
1.23
2.39
2.2
1
0.97
0.95
0.91
1.07

## Sheet: Figure 4H
Figure 4H. MML-1::GFP nuclear localization under tkt-1 and atgl-1 double knockdown.
luci	tkt-1i luci	atgl-1i luci	tkt-1i atgl-1i
3.16	3.54	0.75	4.92
2.59	3.51	0.71	3.87
3.44	1.95	0.78	1.97
2.16	2.03	1.52	2.13
2.98	2.61	0.9	1.61
2.29	2.08	1.78	1.8
1.57	5.24	1.09	2.62
1.57	2.41	1.58	4.05
3.53	2.53	1.21	5.07
3.6	5.13	1.54	5.8
1.44	3.24	1.28	3.16
1.71	2.65	1.63	1.85
0.94	3.91	1.05	2.86
1	2.8	0.84	3.33
1.37	5.71	0.92	6.62
1.65	6.13	1.06	5.61
1.71	5.23	1.26	6.44
1.69	4.68	1.55	4.14
1.95	4.62	1.06	4
1.99	4.06	1.65	3.69
1.72	5.29	1.68	1.85
2.7	4.69	1.7	3.36
3.51	3.24	1.08	2.66
1.5	2.27	1.38	2.91
1.57	3.38	1.76	2.57
2.62	2.87	1.36	7.53
3.35	3.37	1.34	5.08
1.88	2.87	1.58	5.91
2.91	2.75	1.24	3.98
2.29	3.59	0.7	3.27
2.9	3.34	1.1	4.12
2.84	1.51	1.91	3.4
1.7	4.96	1.17	5.15
2.08	2.98	1.27	2.64
2.37	5.08	1.39	4.7
3.77	2.41	1.69	1.96
2.3	2.56	1.58	1.77
2.83	1.43	1.63	2.25
1.88	1.89	1.88	1.66
2.17	2.74	1.41	2.9
1.51	1.93	1.34	1.59
1.42	1.89	1.43	3.32
3.8	5.13	1.09	2.19
1.65	3.37	1.12	3.58
2.05	1.65	1.46	2.25
3.1	2.18	0.86	2.77
3.15	3.38	1.24	2.82
2.67	3.36	1.34	0.99
1.34	2.96	1.65	0.71
1.47	2.51	1.97	4.57
1.78	3.07	2.54	3.12
1.39	5.27	1.37	2.79
2.33	4.69	2.08	4.15
2.01	4.68	1.9	6.44
1.85	5.65	1.85	4.16
1.92	4.36	1.61	3.36
2.78	2.66	2.16	4.32
1.98	2.05		4.01
5.01	1.66		1.3
3.59	1.21		1.69
3.35	2.82		3.32
1.96	5.58		1.31
2.4	6.18		2.65
2.35	2.31		3.02
1.47	1.66		1.71
1.23	3.15		1.32
1.1	2.7		1.01
1.98	3.13		2.08
1.86	2.94		1.08
1.31	5.4		1.16
1.21	3.37		2.59
3.52	3.7		1.96
	3.8		1.56
	3.62		2.15
	3.54		2.54
	3.23		2.44
	2.64		2.05
	3.95		2.42
	3.37		5
			4.57
			1.61
			2.1
			3.67
