# Supplementary material for: Hexokinase regulates Mondo-mediated longevity via the PPP and organellar dynamics
Source: eLife. 2025 Aug 11;12:RP89225. doi: 10.7554/eLife.89225 (PMC12339002; doi:10.7554/eLife.89225)
Supplement: Figure 5—figure supplement 1—source data 1. [file elife-89225-fig5-figsupp1-data1.xlsx]

## Sheet: Figure S5B
Figure 5-figure supplement 1B. NADPH/NADP+ levels in high glucose or starvation media with 6-AN.
HG_DMSO	HG_16 μM 6-AN	HG_100 μM 6-AN	S_DMSO	S_16 μM 6-AN	S_100 μM 6-AN
2.9	1.93	1.61	1.2	1.28	1.43
2.49	1.74	1.21	1.22	1.18	1.63
2.23	1.94	1.65	1.39	1.47	1.58
2.07	2.02	1.68	1.31	1.51	1.62

## Sheet: Figure S5C
Figure 5-figure supplement 1C. ARRDC4 expression under 6-AN.
HG_DMSO	HG_6-AN 16 μM	HG_6-AN 100 μM	S_DMSO	S_6-AN 16 μM	S_6-AN 100 μM
1	6.928	8.578	0.974	0.749	2.443
1.174	2.591	4.064	0.464	0.649	4.042
1.309	2.813	6.365	0.689	1.348	2.837
