# Supplementary material for: Hexokinase regulates Mondo-mediated longevity via the PPP and organellar dynamics
Source: eLife. 2025 Aug 11;12:RP89225. doi: 10.7554/eLife.89225 (PMC12339002; doi:10.7554/eLife.89225)
Supplement: Figure 5—source data 1. [file elife-89225-fig5-data1.xlsx]

## Sheet: Figure 5B
Figure 5B. MondoA nuclear localization under high glucose and starvation treated with 6-AN.
HG_DMSO	HG_6-AN 16 uM	HG_6-AN 100 uM	S_DMSO	S_6-AN 16 uM	S_6-AN 100 uM
1.15	1.12	1.3	1.08	1.05	1.18
1.18	1.14	1.28	1.12	1.07	1.17
1.1	1.08	1.35	1.1	1.02	1.18
1.12	1.1	1.5	1.05	1.06	1.2
1.17	1.16	1.6	1.15	1.03	1.22
1.13	1.12	1.45	1.1	1.04	1.25
1.14	1.13	1.55	1.08	1.01	1.3
1.16	1.1	1.4	1.09	1.02	1.17
1.11	1.14	1.48	1.06	1	1.26
1.19	1.15	1.38	1.07	1.08	1.32
1.15	1.25	1.7	1.23	1.11	1.4
1.16	1.24	1.65	1.25	1.12	1.28
1.2	1.23	1.15		1.12	1.17
1.21	1.22	1.23		1.15	1.18
1.16		1.56		1.16	1.17
1.14				1.15	1.18

## Sheet: Figure 5C
Figure 5C. MondoA expression under 6-AN.
HG_DMSO	HG_6-AN 16 μM	HG_6-AN 100 μM	S_DMSO	S_6-AN 16 μM	S_6-AN 100 μM
1	1.066	0.762	0.796	0.34	0.694
1.401	1.037	1.024	0.645	0.338	0.931
0.827	0.387			0.799	0.818

## Sheet: Figure 5D
Figure 5D. TXNIP expression under 6-AN.
HG_DMSO	HG_6-AN 16 μM	HG_6-AN 100 μM	S_DMSO	S_6-AN 16 μM	S_6-AN 100 μM
1	5.951	5.398	1.513	0.379	4.092
1.034	3.406	4.729	1.549	0.482	2.735
1.164	2.649	7.892	1.025	2.464	5.589
