# Supplementary figures and images for: Hexokinase regulates Mondo-mediated longevity via the PPP and organellar dynamics
Source: eLife journal article supplement (doi:10.7554/elife.89225), 2023-08-02

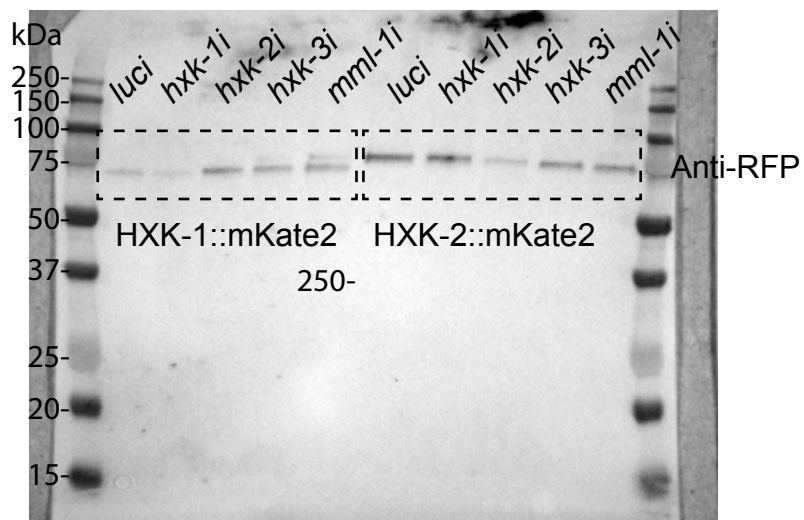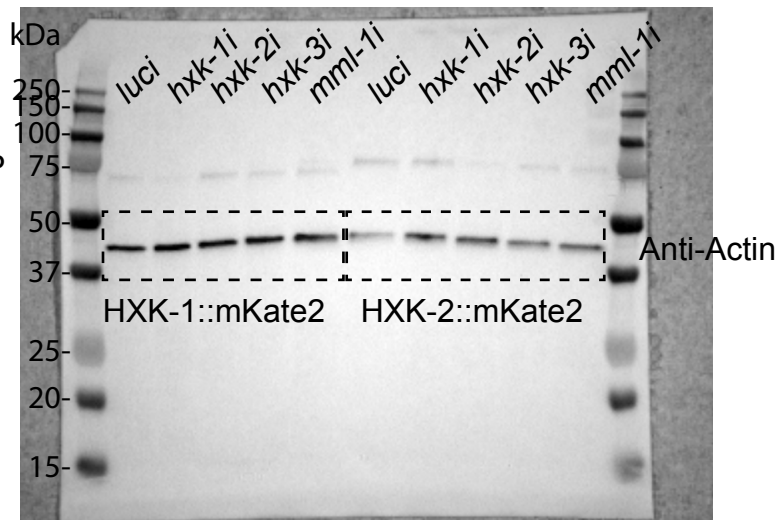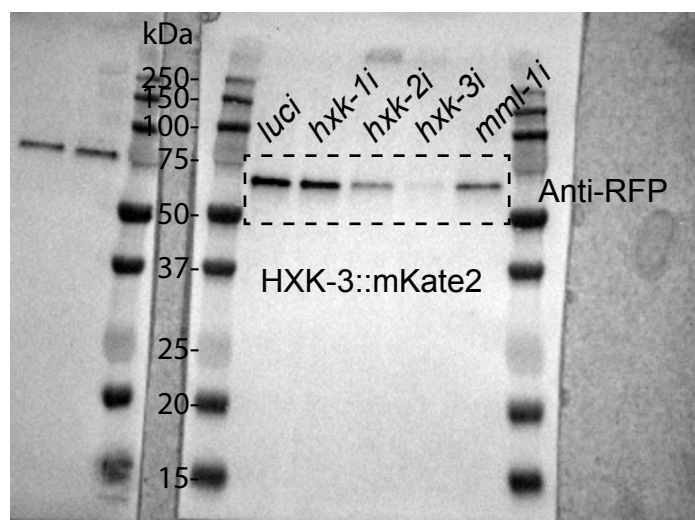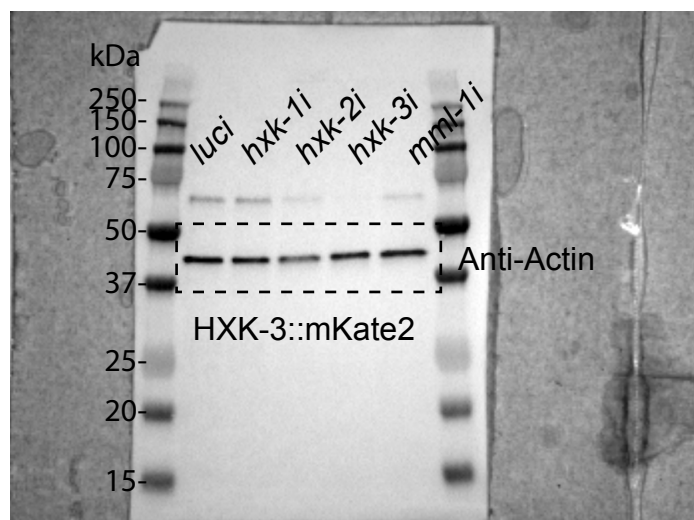

Supplement: fig1-figsupp1-data2 [file elife-89225-fig1-figsupp1-data2-v1.zip]
